# Supplementary material for: Identification of potential obese-specific biomarkers and pathways associated with abdominal subcutaneous fat deposition in pig using a comprehensive bioinformatics strategy
Source: PeerJ. 2024 May 31;12:e17486. doi: 10.7717/peerj.17486 (PMC11146330; doi:10.7717/peerj.17486)
Supplement: Supplemental Information 1 [file peerj-12-17486-s001.xlsx]

## Sheet: Info
Title:	Identification of potential obese-specific biomarkers and pathways associated with abdominal subcutaneous fat deposition in pig using a comprehensive bioinformatics strategy
Authors	Yongli Yang et al., peerj
Additional files:

## Sheet: S1
Table S1: The transcription per million(TPM) of gene expression in the obese and lean pigs
gene_id	GSM4057263	GSM4057267	GSM4057271	GSM4057265	GSM4057266	GSM4057268
DCTN5	11.932	23.1989	11.4722	19.8984	23.7559	18.6742
PALB2	2.64697	3.14514	2.21015	2.622	2.83646	2.31837
UBFD1	8.42945	14.7693	7.87124	15.4284	16.9116	14.8672
EARS2	2.58689	2.91408	1.9021	3.39375	4.12475	3.29186
GGA2	6.0046	5.25699	4.76589	4.65198	5.83783	5.74058
COG7	3.24809	3.45764	2.97578	3.84771	6.06058	3.30031
NDUFAB1	165.384	0.0623255	0.0816125	0.0475213	219.791	219.062
B3GALT2	0.0612215	4.28025	3.1219	250.283	0.0833147	0.0653273
CDC73	4.58244	271.732	213.444	4.1425	3.13243	3.53376
UCHL5	11.5556	15.6602	11.1292	14.2214	14.7251	15.2374
U6	0	0	0	0	1.45826	0
RGS2	1.50647	8.75499	1.14313	2.41309	0	2.0359
RGS21	0	0	0	0	2.35345	1.1592
RGS1	9.54128	0	0	0	0	0
SNORA70	0	0	7.45259	0	0	0
SNORA70	0	0	0	0	0	0
U6	0	0	0.130955	0.346714	0.171523	0
FAM5C	0	0	0	0	0	0
RGS18	256.306	0	0	0	0	0
U6	0	101.999	99.6052	76.8824	23.9086	77.025
Y_RNA	0	0	0	0	0	0
5S_rRNA	0	0	0	0	0	0
UCHL5	14.9421	21.1082	13.8478	18.1333	16.7822	17.4069
KCTD3	4.1122	4.14916	3.254	3.85826	5.35135	3.79244
ESRRG	0	0	0	0	0	0
U6atac	0.530452	0	0	0.663203	0.944739	0.549353
GPATCH2	0.630685	0.43286	0.493656	0.323407	0.442767	0.408164
SPATA17	1.61853	0.117858	0.153802	0.299603	0.493362	0.215575
KCTD3	4.54598	4.76775	3.79817	4.44732	6.12959	4.26843
RRP15	10.5402	0.80759	6.9774	34.0872	21.5211	39.869
TGFB2	0	0.0734251	3.3295	0	0	0
7SK	9.11375	0	0.0759501	13.5627	0	11.861
LYPLAL1	11.2424	0.0260435	0	0	0	0
MPHOSPH6	0	14.4734	18.2103	0	0	0
SLC30A10	0.0712114	0	0	9.61865	11.5072	0
ORF	0	18.8883	0	0.0132378	16.9942	20.0915
BPNT1	7.44775	19.7346	10.1982	13.6854	17.6532	12.2893
EPRS	10.1214	21.0358	10.711	15.4875	15.8807	12.9139
IARS2	15.8008	21.2166	17.0127	25.5531	28.23	19.5795
ssc-mir-215	0	0	0	0	0	0
ssc-mir-194b	0	0	0	0	0	0
RAB3GAP2	0	8.78505	0	0	13.6036	0
SNORA36	0	0	9.13057	12.4239	0	11.8527
U6	13.9973	0	0	0	0	0
U6atac	0	0	0	0	0	0
IARS2	15.0755	0	0	24.2694	25.0526	18.2662
ssc-mir-194b	0	0	0	0	0	0
ssc-mir-215	0	16.9921	12.8025	0	0	0
MOSC2	59.169	79.6857	45.8183	103.616	132.146	71.0473
MOSC1	0.43123	1.26118	1.14106	0.662681	1.24231	1.26616
C1ORF115	2.49872	2.92737	1.93003	2.7303	2.1675	2.28132
HLX	1.00557	0.808696	1.05362	0.712547	1.19884	0.696614
HHIPL2	0.165789	0.0842298	0.167946	0.111308	0.128352	0.11494
TAF1A	2.39781	2.23894	1.65223	1.76745	6.44464	1.33811
DUSP10	15.9422	11.4914	11.257	9.75673	2.21259	8.44992
AIDA	9.48356	0	7.90971	10.7465	7.83457	5.91788
MIA3	0	10.9402	0	0	16.5243	11.0166
FAM177B	9.11335	7.71196	0.289837	8.20901	0	0
BROX	13.6305	9.76019	8.99081	13.6274	0.157708	0
U6atac	0	7.79679	0	0	16.1308	0.445957
WDR64	0.133802	0.117883	0	0.0479371	0.303457	0
YWHAZ	0	0	0	0	0	0
U6	0.103553	0	0.0650405	0	0	0
GREM2	0	1.57113	1.16472	2.19962	0	0.0276424
CHML	0	0	8.98235	0.0638098	1.61785	0.908365
RGS7	0.423261	0.215081	0.148846	0.158163	0.110687	0.100861
U6	0	0	0	0	0	0
KMO	0.0353481	0.186709	0.0603068	0.116794	0.0708782	0.082939
ZNF596	2.39288	1.72802	2.05416	1.62059	2.28374	1.55723
CNIH4	11.329	12.6693	7.04661	11.6573	11.5588	12.0486
FH	44.2547	48.083	40.8768	47.048	29.882	60.8692
U3	0	0	0	0	0	0
CNIH3	2.02295	0.901688	0.769862	0	1.50602	2.18731
MIXL1	0	0	0	3.66686	0	0
LIN9	1.03732	1.2614	1.23453	1.0239	0.927427	0.968168
WDR26	9.75783	9.24326	10.2945	12.0532	0	30.0931
H3F3A	0	0	0	36.4902	0	0
U6	43.221	52.3348	43.6852	0	13.4665	4.21705
C1ORF55	0	0	0	0	0	0
PYCR2	5.54648	5.05194	5.35389	5.29539	7.03451	14.8059
SRP9	2.30654	4.35893	1.8887	17.6531	22.4602	15.1483
ENAH	12.5076	0.536445	10.6875	0.654861	0.376511	5.28964
TMEM63A	0.393285	18.3025	0.429823	0.478388	0.732257	0.587028
EPHX1	41.6109	0.787106	21.0903	40.9942	57.7195	58.4657
C1ORF95	0.330517	1.57921	0.274238	1.10881	3.75394	1.72647
ITPKB	0.486401	2.01731	0.597657	1.48174	1.33178	0.938563
PSEN2	3.48373	6.17014	3.57238	6.00593	7.60121	5.58934
PARP1	12.831	14.7681	9.98896	11.7617	15.6237	12.8857
SNORD112	0	0	0	0	0	0
AHCTF1	3.85992	4.32402	2.91223	4.30784	4.84566	3.52959
MAP1LC3C	0	15.6972	0	4.44629	16.2801	0
EXO1	0.0184597	0	0	0	0	0
PLD5	0.00522583	0	0.0459276	0	0	0
CDC42BPA	4.06238	0	3.13027	0	0.0224445	23.3147
ADCK3	34.643	30.508	24.9997	26.2025	0	26.8336
AKT3	1.68941	2.27713	1.68225	1.83923	31.2754	1.42931
SDCCAG8	2.93072	2.92441	2.44377	2.33514	0.687231	2.20987
SDCCAG8	4.1436	0	5.01384	0	1.95832	0
ZNF238	0	1.84936	0	2.72786	3.07767	2.48499
C1ORF100	0	0	4.33692	0	0	0
ADSS	3.31846	3.8882	2.50949	3.79506	3.8317	3.42213
5S_rRNA	39.5465	0	0	0	39.4092	0
ADSS	0.714687	1.5207	1.25253	1.59961	1.54552	1.36476
DESI2	2.90475	2.70986	2.24052	3.57911	4.05491	3.15015
EFCAB2	1.00603	1.3604	0.703548	0.836658	0.358866	0.774386
SMYD3	2.74083	3.38517	2.38898	3.09456	3.21246	1.99953
KIF26B	0.00615658	0.00285859	0	0.00952475	0.0077221	0.00656451
CNST	4.5496	1.56013	1.34348	4.06544	3.07462	3.14503
CNST	1.59699	3.4802	1.03833	1.5629	1.8496	1.63282
TLR5	2.07126	0.0200402	0	0.846507	2.81663	0.669947
C1ORF65	0	2.02177	0.28203	0.0611153	0.0269102	0.0630877
HNRNPU	0.93896	0.28832	0.461454	0.646506	0.811835	0.924689
U6	0	0	0	0.0137749	0	0
KCNT2	0	0	0	0	0.510655	0
CFH	0.125268	0.549483	0.196621	2.15422	44.0378	0.744265
TP53BP2	2.51031	3.73644	2.26231	1.97658	1.53738	1.75472
ASPM	0.00409699	0.00415598	0.00436825	0.00211214	0.00374465	0.00218409
ZBTB41	4.32841	3.96023	2.64672	7.1158	7.73224	6.11869
CRB1	5.35373	0	0	5.72461	0	0
FBXO28	0.0150882	5.30684	0.0179791	0.0156147	0	5.89965
DENND1B	1.54189	2.22403	1.62105	2.85508	4.00178	2.04571
LHX9	0	0	0	0	0	0
C1ORF53	3.96894	4.53975	4.94479	4.0922	7.72997	5.06374
NEK7	11.0256	9.8479	10.1132	9.76258	11.4569	11.2563
ATP6V1G3	0	0	0	0	0	0
ssc-mir-181a-1	0.041696	0	0	0	0	0
ssc-mir-181b-1	0	0	0	0	0	0.111197
PTPRC	0.13432	0	0.23873	0.590221	0.0041462	0.261303
NR5A2	0	0.823479	0	0	0	0
KIF22	0.026384	0	0	0.0612873	0.120268	0
ZNF281	1.96523	1.67693	1.34712	1.94614	2.16937	1.34737
DDX59	1.56401	1.78291	1.32491	2.16967	2.40142	1.813
CACNA1S	0	0	0	0.0030439	0	0
KIF21B	0.0569621	0	0.137667	0.133192	0.377956	0.129577
TNNT2	0	0.269778	0	0	0	0
TNI-S4	0	0	0	0	0	0.025758
LAD1	1.01375	1.08121	0.809934	1.3047	1.54036	1.06051
TMEM9	0.0155448	0.6176	0.0248635	1.03083	0.0212437	0.091188
CAMSAP2	0.915661	0.236895	1.20047	0.244821	1.82601	1.41687
PKP1	0	0	0	0	0	0
IGFN1	0	0	0	0	0	0
PHLDA3	8.06472	16.7576	10.3079	33.7129	0.215476	19.9828
NAV1	0.0216679	0.0220966	0.0693311	0.39435	0.718116	0.138781
IPO9	1.77986	3.53458	1.42386	1.99657	6.83023	2.7895
CSRP1	2.87688	0	0	0	0	6.45234
ELF3	0.0162902	8.26716	4.82864	0	0	0
PTPN7	0	0	0	0.00760989	0.0572604	0
LGR6	0.00368858	0.01123	0.0157316	10.5317	51.1474	0.00786627
UBE2T	1.26571	1.25266	1.04134	2.1725	2.78445	2.60516
NAV1	0.352851	0.527628	0.399321	0.19454	0.460104	0
PPP1R12B	0.356667	0	0.444894	0	0.00295559	0.366032
SYT2	0.00970752	0.266568	0.00345015	0.01335	0.913268	0.53465
KDM5B	3.77943	3.27127	3.50112	2.66165	3.07713	3.703
RABIF	2.44575	3.37761	2.4009	3.80071	5.13816	3.71931
KLHL12	6.24342	5.39081	4.34245	6.55535	9.53226	8.08481
ADIPOR1	12.733	17.111	11.6957	15.7463	19.9313	14.8363
HABP4	11.0006	0.823444	10.1359	1.05627	46.0446	31.5013
CDC14B	2.03037	26.7148	1.16224	0.136995	1.91496	2.12338
ZNF367	0.147363	12.5096	0	0.220917	0.207067	0.121253
SLC35D2	0.522724	0.145464	0.492561	4.46311	35.8327	0.525053
CYB5R1	13.4734	0.0399068	10.197	42.3045	5.58454	65.0955
KDM5B	5.55437	0.46293	5.77014	0.50821	0.878554	45.2326
HSD17B3	0.0320243	0.0489121	0.0170765	0.0165753	0.0435639	0.0683471
5S_rRNA	2.12531	0	0	0	0	1.76806
PTCH1	0.597896	0	0	0	0.239195	0
ssc-mir-24-2	0	0.379883	0	0.471688	0	0
ssc-mir-23b	0	0	0	0	0	0
ssc-mir-27b	0	0	0.580767	0	0	0.381124
FANCC	0.0637054	0.0433055	0.113243	0	0.0192021	0.0226676
U6	0	0	0	0	0	0
FBP1	10.6009	8.12472	8.4327	4.65371	5.49768	7.97009
FBP2	37.8398	33.8333	27.9816	19.1257	23.0555	14.6141
DAPK1	0.395552	1.53863	1.5532	0.24209	0.521207	0.26864
DAPK1	0.266931	1.00418	0.892687	0.137769	0.309816	0.129396
C9ORF153	0.592807	0.0302921	0.221326	0.369625	0.373495	0.189937
GOLM1	3.61224	4.93794	2.70379	5.30194	6.25106	4.49402
NAA35	0	1.34643	0	0	0	0
U6	0	0	0	0	100.476	0
U6	0	0	0.0331599	0	0	1.04634
ISCA1	1.61706	2.68429	0.694985	0	0.0215961	0.0356976
SLC28A3	0.239256	0.650703	0	0.84053	0	0.347325
AGTPBP1	1.0254	1.68207	0.833349	0.659011	0.236373	0.940838
TRKB	0.189058	0.325222	0.36702	0.335611	1.14667	0.279233
RMI1	0.242785	134.381	0.146034	0.179936	0.463241	0.252284
KIF27	145.257	0.303457	115.863	138.723	0.420068	132.447
C9ORF64	4.67554	3.02192	2.78165	3.98487	3.812	2.06834
ZCCHC6	0.237535	33.7379	19.2728	21.9195	23.073	19.4843
GKAP1	4.63825	3.89801	2.8074	4.09243	4.45156	3.4033
FRMD3	0.0816782	0.333065	0.130671	0.275135	0.18473	0.130775
CCL21	0	0.141116	2.02216	0.0528836	0.0727223	0
IDNK	0.252102	3.24481	0	0.091916	0.230608	0.0544004
CCL19	0.0406316	0.0903965	0.0543448	1.27782	0.396685	3.20207
CCL27	3.59155	2.35218	0.201697	2.70124	0	0.605874
RASEF	0	0.0111076	0.0116488	0	0	0
U6	0	0	0	0	3.49164	0
HNRNPK	4.44754	8.70435	61.8535	5.27826	69.4548	3.94473
ssc-mir-7-2	61.2155	109.013	0	80.8382	0	62.7748
GALT	0	0	20.9521	0	3.39455	0
ARID3C	0	46.5716	9.42773	0	0.0215715	0
IL11RA	6.42608	0.0120693	0	0	5.59381	4.86789
ENHO	0	0.627378	0.129602	9.78705	0	0
CNTFR	0.516353	1.98705	0	1.70481	2.5961	0.8151
UBQLN1	0.529013	0.02407	0.919298	0	11.0164	0.648816
C9ORF24	11.3829	10.2211	11.6423	39.2583	0.0213043	13.6262
C9ORF23	13.3218	19.1809	10.9909	9.65521	17.1127	0.100743
DCTN3	0	25.2816	11.9456	16.3132	17.7572	14.5508
SIGMAR1	5.881	21.0082	3.08857	17.7711	45.8716	16.223
DCAF12	3.44487	3.00485	17.2649	3.23943	4.71208	4.16537
NUDT2	7.45713	6.30043	5.45499	8.96853	10.6154	8.52698
UBAP1	5.54847	6.41201	5.34499	8.37115	12.5211	9.80711
KIF24	0.406858	0.29762	0.484246	0.53023	0.495517	0.558246
UBAP1	11.0717	14.2457	9.76384	15.634	19.4178	15.1823
NOL6	1.03007	1.7938	0.821948	1.96726	2.16083	1.7786
AQP3	4.46726	4.22453	1.6382	5.18053	5.5443	5.62858
UBAP2	3.10682	0	3.25161	0	0	0
SNORD121A	0	0	0	0	0	0
SNORD121A	0	0	0	0	0	0
SNORD121A	0	29.17	0	20.0645	8.61679	5.35831
AQP7	25.293	31.962	26.4556	60.2993	71.8332	53.0345
NFX1	4.41128	4.33409	3.81966	3.84711	3.49437	3.99569
CHMP5	18.6408	20.2694	14.5467	21.0809	21.0653	21.0585
SPINK4	0	0	0	0	0	0.138446
BAG1	21.0228	20.3548	14.0539	21.7033	24.5719	27.2376
B4GALT1	10.6192	16.5859	8.10128	13.4852	8.89234	7.05458
SMU1	9.39808	14.2465	9.70859	9.75789	9.67075	9.77908
TMEM215	0	0	0	0	0.0770111	0.0454563
APTX	3.61088	5.79593	4.15079	4.4081	5.3804	5.18637
DNAJA1	54.5626	14.0864	90.7178	11.6585	7.36641	65.7574
TOPORS	13.2689	5.65716	1.3442	2.96442	3.10257	1.76482
RIG-I	3.76215	148.223	10.0145	92.1452	89.9357	9.13351
SNORA31	0	0	0	0	0	0
SNORA31	0	0	0	0	0	0
U6	0	0	0	0	0	0
7SK	0	0	0	0	0	0
U6	0	0	0	0	0	0
7SK	0	0	0	0	0	0
U6	0	0	0	0	0	0
LINGO2	0	0	0	0	0	0
LINGO2	0	0	0	0	0	0
IFN-KAPPA	0.119478	0.0816137	0.254917	0	0.071308	0.0851195
U6	0	0	0	0	0	0
C9ORF72	14.1996	9.43169	10.91	9.4701	10.7807	9.31342
BAMBI	0.249025	0.217582	2.16129	1.26126	1.11453	1.23521
5S_rRNA	0	0	0	0	0	0
MTPAP	72.8711	3.91466	2.76474	3.79829	0.99998	3.12239
KIAA1462	3.31202	0.75713	0.432282	0.706855	0.0653766	1.73303
MAP3K8	0.527051	0	3.02016	4.89765	3.98847	1.63e-10
ZNF438	0	0.637526	0.653191	0.259121	0.255571	0.346346
ZEB1	14.5018	2.43601	1.68959	1.97931	1.62057	2.12961
SVIL	1.47147	2.04404	3.83285	16.4451	2.52132	12.5438
WAC	3.4093	16.3033	2.75222	2.73109	18.8711	3.04869
U6	2.28514	105.316	0	94.7163	0	0
ARHGAP12	0	0	114.114	0	21.8353	17.9034
CUBN	0.0423323	0.0117624	0.0074174	0.0109383	0.0940516	0.00741738
TRDMT1	0.00463784	0.0107602	0.0225709	0.0119558	0.00423835	159.475
EPC1	2.56232	2.10086	1.69583	1.76468	2.48461	0.568874
PTCHD3	1.07e-08	2.56e-09	0	8.52e-07	1.3e-09	2.47e-09
ACO1	0.0270472	0.00916275	0.0672969	0.0279428	0.0820829	0.0576999
KIF5B	15.5545	37.2472	16.0941	39.6295	40.5139	25.9509
ST8SIA6	0	0	0	0	0	0
STAM	2.82504	3.9629	2.62944	0	0	0
SLC39A12	0	0	0	0	0	0.00856975
5S_rRNA	0.0321389	0	0	4.32111	0.0505624	4.16921
CACNB2	0.071639	0.0561728	0.0451359	0.0335864	6.47533	0.0520819
NSUN6	0.772887	1.91001	1.63257	1.67648	0.972404	0.816948
CH242-21O2.1	1.62337	2.25892	0	1.34616	2.25015	1.5509
SNORA72	0	0	1.0541	0	0	0
RSU1	10.3059	13.0825	10.8134	11.737	14.7171	12.339
C1QL3	0.0294761	0.301229	0.157213	0.0612599	0.0265328	0.0629609
SNORA31	0	0	0	0	0	0
PTER	9.31471	10.255	7.9641	8.20396	7.30662	7.16579
U6	0	0	0	0	0	0
ITGA8	0	0	0	0	0	0
U6	0	0	0	0	0	0
FAM171A1	1.05772	0.951682	0.604584	9.93646	1.42395	0.717015
FAM188A	0	0.214036	0	3.53568	11.0634	0.229318
OLAH	8.10355	2.57964	0.183105	3.01933	0.115068	0.0638933
MEIG1	0.25746	1.93594	7.8389	0.0310782	0.0538359	8.46191
NMT2	4.6199	0.943799	3.54021	4.69981	6.12545	3.48297
DCLRE1C	0.5188	14.3493	0.45506	1.16683	1.46325	0.615833
SUV39H2	1.43696	1.26627	1.04071	2.33626	3.20747	2.70814
CDNF	0.141539	0.0968464	0.100662	0.147717	0.168345	0.151321
MRPL51	0.00703531	1.21348	1.95527	3.30227	1.96313	3.26323
FRMD4A	1.89181	0.114339	0.0300071	0.0581133	0.019237	0.0375166
HSPA14	2.9215	3.82292	2.16931	2.83138	3.02825	2.57859
PRPF18	17.7339	13.5167	11.0096	12.2517	12.6186	11.5704
PRPF18	4.64405	3.92208	3.86053	3.50256	4.28643	4.06571
ARMC4	0	0	0	0	0	0.0172602
MKX	0	0	0	0	0	0.0275082
MPP7	7.85762	10.0102	6.88747	13.9723	14.1183	11.2218
MASTL	0.0193557	0.0327629	0.0275184	0.0266427	0.02353	0.0275234
RAB18	24.1099	0.162816	23.3177	30.6624	31.7199	25.9415
YME1L1	0.0800087	9.15721	0.113764	0.110346	27.7802	25.5017
APBB1IP	10.1132	36.4357	8.88534	8.11933	0.0484451	0.113819
ACBD5	33.3308	35.522	0	0.0225613	0	0
GAD2	0	0	0.127278	0	0.180326	0
GPR158	0.0488099	0.144217	0.010895	0	0	0
MYO3A	0	0	0	24.1516	0	0
7SK	0	0	32.7033	34.869	38.168	28.1421
THNSL1	2.94585	3.33786	2.71428	4.26658	5.15949	4.29867
PDSS1	0.166036	0.940399	0.425514	0.641243	0.715625	0.601387
PRTFDC1	16.7048	11.9948	5.65394	6.12083	3.44206	3.80432
KIAA1217	0.0334817	0.0525036	0.0292084	0.0565064	0.0222438	0.0259638
U6	2.98671	4.40872	416.355	0	0	0
SNORA70	0	0	3.54848	0	0	0
C10ORF67	0	0	0	0	0	0
PTF1A	0	0	0	0.0277495	0.012182	0
ARHGAP21	0.0402399	0.0136482	0	0	15.8494	15.5634
ARMC3	0	0	0	36.2485	0	0
U6	54.407	0	0	21.8078	0	25.5332
MSRB2	19.3813	24.3411	50.8029	7.28324	26.7031	0
SPAG6	0	0	22.7081	0	6.09891	5.39758
VIM	6.99213	8.17235	0	6.74283	6.07796	6.47809
PIP4K2A	18.3788	649.103	3.93568	12.2617	569.067	9.47892
BMI1	13.2086	27.0722	17.826	21.9286	11.9471	19.5964
COMMD3	12.5612	9.40987	7.95832	12.8157	22.2132	10.3544
DNAJC1	0	8.37585	7.13486	1.5176	10.5354	0
7SK	0.132676	0.247512	0	0.0504699	0	0.0819219
SKIDA1	4.99484	0.0851151	0.0893511	0.39966	0.0763775	0.397986
MLLT10	0.567269	0.67809	4.59601	4.05613	0.268753	0
NEBL	0	1.02353	1.05616	2.47018	3.36456	5.1374
5S_rRNA	967.715	2660.09	2423.24	973.746	0.375864	677.178
NRP1	11.6954	11.1292	12.1601	9.83606	1.13964	2.62447
PARD3	7.32111	3.4431	4.44398	3.66153	3.5444	3.87408
CUL2	4.66655	3.81629	3.43209	4.71076	4.54045	3.85445
GJD4	49.6191	0	0.0203698	0.0197882	0.0518735	0
CCDC3	0.0381983	1.54816	6.09511	0.325685	0	0.0279147
U6atac	1.49014	0	0.278853	0	0.0943025	0
CAMK1D	0	0.0207859	0	0.0305185	0.0207664	0.0048524
CCNY	7.5033	7.48545	0.0436674	9.32408	4.31518	10.5234
CREB	0.00910089	7.03383	41.0502	5.40061	15.2328	4.57842
CDC123	10.5177	18.0989	9.35338	13.2074	12.5645	12.0496
DHTKD1	4.83934	0.904743	5.40733	0.919938	1.74248	1.26138
SEC61A2	0.832251	0.0716935	1.26001	2.75997	9.24133	2.90747
C10ORF47	12.8496	5.76272	2.32625	0.0637649	3.37491	0.0470732
NUDT5	3.36065	17.0122	3.30888	7.16694	7.18732	9.98903
USP6NL	4.59272	1.6666	12.8193	1.77657	1.42901	1.39365
ITGB1	1.19055	14.919	1.3469	5.10537	6.837	4.39872
CELF2	3.7225	7.14356	6.04437	11.971	12.881	0
ECHDC3	0.21455	0.0439986	0.228882	0	0	0
U6	0	0	18.1454	0.0447408	0	0.0334042
GATA3	0	0.268766	0.0445333	0.0712748	0.0208936	1.3354
ITIH2	1.025	1.17389	0	1.3331	1.46019	14.0699
TAF3	27.1614	62.3943	0.786721	63.9256	50.5889	0
SFMBT2	0.187089	0.321009	0	0	0.0552655	50.0666
U6	0	0.246397	0.13304	0	0	0.0667418
PRKCQ	0.0160695	0.0326543	0.0085676	0.00829845	0.0875632	0.0480906
ITIH5	25.5848	29.9509	13.2338	27.6937	19.8909	24.4788
PFKFB3	39.1022	21.2686	48.8792	28.5624	0	36.4636
IL2RA	0.30567	0.320707	0	0	0.158897	0.336705
IL15RA	0.457591	0.46561	5.65105	0.180983	5.96286	5.79323
IL2RA	7.44342	0.116717	0.34446	0	0.0445389	0.215393
RBM17	0.0491214	8.35869	0	6.26042	28.9081	0
ANKRD16	1.17257	0.717049	0.782748	0.797861	1.20607	1.05755
FBXO18	2.45126	2.33739	2.17674	2.47267	3.02971	2.25577
U6	0	0	0	0	0	0
CALML5	0	0	0	0	0	0
TUBAL3	0	0	0	0	0	0
ASB13	1.50503	0	0	1.38633	1.94933	1.32489
NET1	0.340315	0.420666	0.810388	0.465634	0.334925	0.294326
UCN3	0	0	0.382508	0	0	0
TUBAL3	0	0	0	0	0	0
FAM208B	0.982918	0.887694	0	1.12481	1.46205	1.03049
GDI2	41.0034	55.1994	47.9504	47.0648	53.5264	43.7396
CALML5	0	0	0	0	0	0
AKR1C1	0.199158	0.368908	0.729182	1.21611	0.47313	0.847635
AKR1C3	0.441298	0.120072	0.356489	0.42707	0.310627	0.673499
AKR1E2	0.855972	0.114866	0.348982	0.171273	0.242322	0.264895
AKR1C4	219.31	118.745	229.083	420.729	306.554	331.74
AKR1C3	0	0	0	0.0222571	0.0305428	0.0328676
AKR1E2	0.481612	0.0536038	0.216609	0.124562	0.174062	0.116393
U6	0.00946368	0	0	0	0	0
ADARB2	7.86558	0.0224066	0.00672697	0.0227751	0.00576296	0.0033636
PITRM1	3.59597	6.22798	4.89364	1.12863	1.89894	1.02591
KLF6	33.9925	55.5391	25.8701	55.3544	24.9653	20.4306
GTPBP4	38.0946	4.54358	3.15207	5.01675	5.54821	4.59779
LARP4B	0.898434	1.45125	19.0168	5.87111	8.47211	28.0052
ZMYND11	0.102564	10.5899	0.32551	0.327823	0	0
ZNF510	9.42953	0	0.18593	0.116597	0.167965	0.13129
C9ORF21	2.41385	0.0938443	1.02273	2.50987	1.58782	1.39097
ZNF782	5.14006	0.898477	0	0	0	0
U6	0	0	2.18903	2.126	1.99081	1.78346
RNaseP_nuc	0	9.67751	0	0	0	0
ARL5B	7.26569	0	4.13477	7.51258	4.17256	2.62689
CTSL1	69.1014	0.787515	92.1817	41.4764	45.0229	41.1918
AKR1C4	220.454	82.8964	0	0	309.931	0
U6	0	0	231.316	0	0	0
U6	0	0	0	0	0	0
CRYL1	3.62047	4.74739	4.20767	1.171	4.19714	1.2572
XPO4	1.61874	0.989891	0.590908	1.774	1.52613	1.04306
IFT88	1.69361	2.28667	1.66829	0.645287	1.13793	0.485367
IL17D	3.86091	4.02007	3.66323	4.94938	4.14678	3.44692
SKA3	0.428931	0.343825	0.37425	31.6078	0.767489	29.7731
SAP18	30.246	36.6808	28.0452	0.144209	30.2653	0.119105
FGF9	0.0372201	64.6026	92.5219	104.612	0.160936	0.955352
ZDHHC20	12.5525	0.0851174	0.0198447	6.5774	2.42498	335.657
EFHA1	112.094	2.94456	11.5872	2.43391	7.44314	5.49469
SACS	1.65552	6.56095	6.10314	1.24733	0.82034	8.01554
OPTN	1.03579	0.818593	1.05529	0.799565	0.0017004	0.825447
SACS	0.59926	0.623489	0.684303	0	23.9439	1.19187
SGCG	0.00559229	0.00757097	0	20.841	2.12792	0.00596376
TNFRSF19	18.0892	1.93332	19.9645	1.26974	0.0186143	0.820474
MIPEP	0.0617328	2.32045	0.0877885	2.17526	24.0246	0
SPATA13	1.61303	0	0.0180252	0	0.0384873	0.00901502
FAM123A	0	0	0	0	0	0
SHISA2	0.101305	0.00575502	0.17828	0.018024	0.045537	0.015965
ATP8A2	0.0698654	0.0253313	0.0372475	1.66802	1.9958	1.66532
RNF6	2.37332	2.6275	1.56349	0	5.21233	0
CDK8	6.87652	0	4.79704	6.39796	0	6.36621
GPR12	0	6.78764	0	0.48695	171.549	0.561304
WASF3	0.512229	0.493085	0.354327	3.59283	0.678793	164.794
USP12	2.85013	2.09857	2.15276	425.991	3.80875	2.6263
RASL11A	0.139717	0.244141	0.180946	1.18937	0.298015	0.0426086
GTF3A	1.01399	0.783788	0.602361	0.941788	1.17694	0.659907
U6	0	0	0	0	0	0.924935
LNX2	1.96935	1.24704	2.06267	2.88026	2.57632	1.25115
GSX1	0	0	0	0	0	0
PDX-1	0	0	0	0	0	0
FLT3	0	0	0	0	0	0
PRHOXNB	0	0	0	0	0	0
CDX2	0.00589277	17.7091	0.00628334	0	0.188308	28.7507
POLR1D	36.4689	0.0119701	32.8042	25.0555	0.0107499	0.0179986
POLR1D	63.305	34.3429	42.8958	55.1642	67.5354	75.7178
U1	0.0244321	0	0	0	0.0445909	0
FLT-1	0	0.342279	0.0468918	0.211776	0	0.0573186
PAN3	0	3.55831	0	0	2.73957	2.80525
U1	5.86467	0	3.76458	3.22964	0	0
MTUS2	0.0105834	0	0.0225696	0	0	0
MTUS2	0	0.0053726	0.0283007	0.00546115	0.00482785	0
POMP	169.125	268.144	150.826	207.086	185.749	153.044
SLC7A1	0.132793	0.351295	0.169935	0.288447	0.410082	0.198353
UBL3	19.0739	16.8083	15.1397	18.9338	19.7145	18.2611
UBL3	16.1461	14.914	10.9068	19.4538	19.9929	18.1675
USPL1	4.43497	2.18215	1.73106	2.00638	3.34474	2.0516
KATNAL1	2.66328	3.96412	3.51964	4.10342	4.3604	3.45018
USPL1	1.94006	1.59804	1.41068	1.7377	2.35689	1.81236
ALOX5AP	6.7009	5.27694	4.68191	6.1474	4.89567	3.79936
U6	0	0	0	0	0	0
TEX26	0.0932002	1.49477	1.36638	0.379961	1.93238	0.697863
C13ORF33	9.84347	9.41724	10.1258	9.59176	8.08295	5.46701
RPL21	0	0	0	0	0	0
SNORD102	0	0	0	0	0	0
SNORA27	627.371	0.0263224	0.00552179	0.00535164	0	0
U6	0	723.821	0.988075	0.710421	0.874419	1.34396
RXFP2	0.00517815	5697.33	0	0	11.3413	2.68108
B3GALTL	1.29998	1.31716	2799.53	4011.27	667.474	2.36593
HSPH1	7.77581	14.612	5.08315	15.9493	0	33.7701
HMGB1	3.17782	3.85057	3.66163	65.2391	1926.87	2.49365
N4BP2L2	6.70777	0.00373642	4.77376	0	0	4.1894
U6	0	6.68554	0	0.0227875	0	0
KL	0.0110453	95.2278	0	5.66624	6.23916	0.0667398
PDS5B	2.76524	2.62486	1.73482	2.03962	2.20869	1.70769
STARD13	5.98488	7.70038	6.52813	7.10716	7.74899	6.93634
RFC3	2.56742	2.09086	2.01326	0	2.5077	1.74043
DCLK1	0.640234	0.518353	0.0694213	0.178004	0.0147562	0.052098
MAB21L1	0.112177	0.133356	0.0398797	0.116211	0.0169301	0.359176
U4	0	0	0	0	0	0
SPG20	39.0315	27.9275	20.5866	29.3658	30.6449	26.7542
CCNA1	0	0	0	0	0	0
SERTM1	0	0	0	0	0	0
CCDC169	1.66361	1.41775	1.51906	2.02799	1.52288	2.63533
SMAD9	0.220558	0.115097	0.06719	0.0584951	0.0172684	0.043675
RFXAP	7.14168	3.46924	3.7152	3.23102	3.79265	2.98627
EXOSC8	8.09194	14.3821	6.49597	9.41611	10.2715	5.11201
ALG5	10.0975	18.606	10.6179	11.2994	17.7262	10.9809
FAM48A	3.40978	3.60635	2.72191	3.11773	4.28041	2.55462
TRPC4	0.0658378	0.0119657	0.166593	0.368336	0.0652319	0.195355
POSTN	0.0235673	0.517876	0.0314117	0.048652	0.0268677	0.00628332
STOML3	0.216032	0.353233	0.071685	0.194095	0.0357144	0.210399
FREM2	0.0823817	0.102156	0.230365	0.0421911	0.384736	0.0373996
LHFP	0.368598	1.52501	35.4363	0.193839	0.485375	0.296784
PROSER1	0.0165274	0.0587771	0.589514	0.0768193	0.0602141	45.9441
NHLRC3	1.98974	1.14912	0.0440589	2.27698	2.07731	0.0352563
PROSER1	0.824775	0.640711	1.44574	0.108601	0.315916	2.37133
COG6	74.206	7.90853	4.59837	5.15435	6.9007	4.71726
SNORA1	0	0	0	0	0	0
TPTE2	0	0	0	0	4.68884	0
SLC25A15	0.983814	2.09279	1.13226	1.79959	0	0.910366
MRPS31	0.00546768	0.0388606	0.0174901	16.15	1.84273	0.0116617
FOXO1	16.3953	0.289722	15.0454	0.0225721	14.6512	13.6444
THSD1	0.395486	1.12912	0.145177	0.535458	0.0249394	4.93882
CKAP2	1.39979	25.1441	1.11015	0.813391	1.12311	0.739844
VPS36	2.72955	2.9797	2.57212	2.20116	0.541712	0.475915
NEK3	0.0342116	0	0	0	2.80576	1.96263
CCDC70	0.0757663	0.0288792	0.0605949	0.0293569	0	0
NEK5	2.44049	2.9447	1.86082	2.13541	0.0517223	0.0505116
ALG11	11.727	15.0974	10.3128	12.3778	2.9956	2.71637
SERPINE3	0	0	0	0	0	0
DLEU7	0.0255892	0	0	0	0	0
FAM124A	0	0.048228	0.0116932	0.075418	0.100146	0.0623675
KPNA4	5.59283	12.6008	6.00825	16.5075	17.3621	13.4968
SPRYD7	23.8934	21.2272	14.7038	21.1908	24.4114	16.3072
INTS6	9.4951	12.0623	7.17282	13.2962	12.9055	10.47
ARL11	0	0	0	12.2303	0.0439683	0.0527559
EBPL	8.34433	27.6547	12.6924	0.051516	21.8734	11.1358
RCBTB1	7.70893	4.09711	6.63875	3.66814	3.08429	1.97697
SETDB2	1.9655	4.35155	1.76061	2.11897	2.80249	1.52447
KPNA3	1.85804	2.58857	1.27304	18.8287	19.5605	15.5583
CAB39L	2.7175	3.8974	1.82284	4.53266	4.7792	3.18242
MLNR	0	0	0	0	0	0
CDADC1	3.28613	3.90546	1.66443	4.11347	4.42363	2.57392
CYSLTR2	0.0177802	0.650503	0.0284396	0.560232	0.0728504	0.189652
U6	0	0	0	0	0	0
RCBTB2	6.80186	6.51163	6.2645	7.70739	6.56155	6.04885
RB1	2.79187	3.31158	2.78168	3.39029	2.82329	3.05783
LPAR6	1.34714	2.60486	2.4721	2.75099	2.09762	1.69163
5S_rRNA	0	0	0	0	0	0
MED4	11.1466	16.0624	11.9373	18.0884	17.1818	13.4248
NUDT15	9.52848	9.18081	9.54914	9.93872	9.83449	7.89509
ITM2B	115.119	118.62	117.304	126.561	109.105	102.418
HTR2A	0.0397056	0	0.0282285	0.0136898	0	0.014121
LRRC63	0	0.163351	0	0	0	0.0343071
LRCH1	0.135107	0	0.0960426	0.139479	0.0703915	0
KIAA0226L	0.0624216	0.581745	0.0665641	0.311816	0.075716	0.155371
CPB2	0.718059	0.371645	0.644836	0.521116	0.0801246	0.658567
LCP1	0.241856	1.31012	0.401163	0.538707	0.569571	0.437065
SPERT	107.23	0	0	0	0	0
7SK	0	0	0	0	0	0
COG3	4.02129	2.51158	2.08876	2.44477	3.47019	2.25811
ZC3H13	2.16836	0.103126	0.215323	0.179762	4.66457	0.215575
GTF2F2	4.45248	32.1513	21.9672	72.0526	22.4545	16.7855
ESD	29.5102	101.723	83.239	21.0739	65.3969	64.8416
KIAA1704	5.07126	95.8716	71.2289	62.6433	104.896	85.6557
NUFIP1	2.2182	5.34819	3.47016	3.93766	4.59795	3.03815
SUCLA2	0	2.09929	1.6847	1.49518	1.69523	1.33653
SERP2	0	0	0	0	0	0
TSC22D1	146.069	1.48278	0.124476	3.44139	0.867405	0.753087
LACC1	9.44948	1.93424	5.91171	2.74352	1.7848	1.46569
CCDC122	1.23994	9.35029	0.594758	0	0	0
ENOX1	12.5288	1.09171	2.6657	0	0	0.0187147
TNFSF11	0	15.6968	0	17.1002	11.9698	14.2485
C13ORF30	0	0	0	15.493	21.0366	13.0186
DNAJC15	8.79166	0	9.74876	0.859362	0.706944	0.272187
DGKH	0.660038	1.0801	0.69327	0.487952	0.719167	0.309905
AKAP11	14.6327	15.401	11.537	26.1338	27.4977	23.7882
NAA16	2.40417	2.27769	1.77238	2.27369	3.17387	3.06686
7SK	0	0	0	0	0	0
ELF1	2.35294	2.65074	2.30487	3.03984	3.56136	2.7437
KBTBD6	0.47024	0.424543	0.289582	0.43844	0.998606	0.537045
KBTBD7	0.970457	0.700617	0.781977	1.26109	1.63137	1.06791
LECT1	0	0	0	0	0	0
PCDH8	0	0	0	0	0	0
OLFM4	0	0.0117313	0	0	0	0
U6	0.00399533	0.012165	0	0.00412174	0	0.00852062
U6	0	0	14.8427	0	0	0
U6	0	0	0	0	0	0
SUGT1	20.8146	0	0	0	0	0
DIAPH3	0	0	0	0.320035	0.0399528	25.7072
PCDH17	3.70852	0	0	5.11253	30.7422	3.85917
MTRF1	0	30.8499	3.4264	0	5.94005	0
U6	0.111474	0.674066	0	30.4029	0	0.39618
SNORA31	0	0	0	0	0	0
U6	2.85403	0	5.01777	4.42868	3.90423	0
U6	0	0	0	0	0	0
TDRD3	11.9741	9.91861	9.78206	7.88102	7.37753	6.77244
KLHL1	0	0	0	0	0	0
U6	0	0	0	0	0	0
DACH1	1.41413	1.29502	0.963626	1.51668	0.832124	0
MZT1	10.2449	7.91824	6.20993	5.81982	8.55755	9.59937
KLF5	0	0	0	0	0	0
PIBF1	2.3186	2.26802	0.784218	1.77394	2.91358	1.51239
SNORA70	0	0	0	0	0	0
BORA	0.107531	0.0770486	0.0549826	0.051011	0.105727	0.0689081
DIS3	1.12116	1.9147	0.821384	1.2333	1.49677	0.938884
U6	0	0	12.5735	0	12.2263	9.37305
U6	6.50399	6.30341	0	9.05056	0	0
TBC1D4	0	12.2596	8.02841	5.73346	8.60554	5.91317
LMO7	0.00513333	0.0208463	0.010947	0.0105949	0.018735	0.0109483
KCTD12	0.126904	0.625418	0.270702	0.241192	0	0.158041
IRG1	0.360493	0.212699	0.320444	0.0628652	0.516419	0.128579
UCHL3	14.9666	20.437	12.9678	18.5489	26.7999	19.7974
CLN5	18.7723	15.7001	14.4652	14.3242	17.0926	12.5434
FBXL3	16.0232	15.7916	11.616	11.1012	9.54327	9.79746
7SK	0	0	0	0	0	0
SCEL	0.242068	0.216503	0	0.125799	0.0272254	0.0382702
SLAIN1	0	0.148734	0	0.151195	0.0266319	0.0832419
U6	0.0877914	0	0.0728129	0	0	0
U6	0	0	0	0	0	0
POU4F1	0	0	0	0	0	0
EDNRB	0.0887686	1.47387	0.105176	1.34537	0.0897558	0.410324
U6	0	0	0	0	0	0
RNF219	2.63443	2.98202	2.79227	2.65543	3.18555	2.37105
MYCBP2	1.98697	3.20672	2.13764	2.68038	3.22819	2.46955
NDFIP2	6.06174	10.8866	7.15939	7.61088	0	7.79474
RBM26	5.44117	2.97778	3.11771	3.34536	2.259	3.03618
SPRY2	4.38309	4.94422	7.95026	5.25241	12.5877	2.40841
SNORA70	0	0	0	0	0	0
5S_rRNA	0	0	0	0	0	0
5S_rRNA	0	0	0	0	0	0
SLITRK1	0	0	0	0	0	0
SLITRK6	0.408773	0	0	0	0.00545182	0
SLITRK5	0	0.161859	0	0	0	0
ssc-mir-17	0	0	0	0	0.391544	0
ssc-mir-19a	0	0	0.369385	0	0	0.2734
ssc-mir-18a	0	0	0	0	0	0
ssc-mir-19b-1	0.0179338	0	0	0	0	0
ssc-mir-20a	0	0	0	0	0	0
ssc-mir-92a-1	0	0	0	2.29628	0	0
U6	0	0	0	0	0	0
U6	0	0	0	0	0	0
GPC6	7.4234	6.72083	8.80525	5.09637	3.54489	2.48884
DCT	0.171499	0.0966949	0.052826	0.0511089	0.0417587	0.0650207
SOX21	0	0	0.0166257	0	0	0.0166354
5S_rRNA	6.88978	0	0	0	0	0
TGDS	0	0	5.82932	0.0142723	0	6.03919
CLDN10	0	0.000871096	0	0	0.0336262	0
GPR180	1.35723	1.27564	0.842403	0.934174	2.88689	3.16142
5S_rRNA	2.44636	12.4294	12.1044	8.91281	12.1143	13.395
DZIP1	7.99055	0	0	0	0	0
HS6ST3	0	0	0	0	0	0
UGGT2	2.21507	2.86128	2.20254	2.32055	3.33503	3.18121
U6	0	0	0	0	0	0
MBNL2	9.0586	12.4972	6.27405	12.9839	14.662	8.38947
CISD1	50.9005	78.8782	61.5726	80.3082	119.574	75.6428
7SK	0	0	0	0	0	0
U6	0	0	0	0	0	0
FARP1	0.192117	0.438682	0.183177	0.293456	0.222665	0.122125
FARP1	0.151982	0.220908	0.206541	0.396809	0.13589	0.0667394
SLC15A1	0.00515157	0.00697348	0.0109859	0.0132907	0.00156678	0
STK24	2.65175	3.95562	1.93466	3.28782	6.40665	0.964912
DOCK9	0.908376	1.49773	0.772655	1.59208	1.17005	0
U6	0	0	0	0	0	8.0575
U1	0	0	6.17865	0.689057	0	0
UBAC2	2802.64	6.9943	4.51334	27.3312	8.39186	5.69713
GPR18	6.27616	0.0354365	0.0371349	7.77547	0.0316162	0.0297231
GPR18	0.0394646	0.0354365	0.0371349	0.0264183	0.0316162	0.0297231
GPR183	0.0394646	0.916305	10.1189	0.0264183	0.998337	0.25776
U1	22.8916	1885.54	2914.95	3.14007	27.5038	2588.83
5S_rRNA	0	0	0	0	0	0
ZIC5	0	0	20.7467	0	0	0
ZIC2	0	0	0	0	0	0
CLYBL	8.28252	10.139	10.4462	9.62417	9.27984	27.9159
U6	0	0	0	13.3964	16.2839	0
A2LD1	1.31918	1.43135	2.81399	2.40127	5.15502	2.82539
NALCN	2.1571	2.2546	1.53391	1.96808	2.66386	1.1242
NALCN	3.59738	4.00974	2.31947	3.37725	3.61037	2.53467
ITGBL1	3.14543	1.98214	0.0219344	1.65248	3.72341	2.4287
FGF14	0.0411412	0.00696462	1.34826	3.64887	0.0312516	0.0731292
TMTC4	11.3316	3.78582	11.4982	11.6464	15.126	15.9652
METTL21C	0	0	0	0	0	0
CCDC168	0.0178292	0.0232565	0.0162942	0.0210123	0.013964	0.0135786
EFNB2	0.141139	0.154551	0.0463096	0.100999	0.296229	0.208472
U6	259.338	0.0466441	0	0	153.068	0.0968293
FAM155A	0	0	501.652	0	0	0
RPL5	0	0	0	0	0	0
U6	0	0	0	769.544	0	0
ARGLU1	1.63564	1.76454	4.19209	2.01047	2.30959	1.41179
LIG4	0	7.91462	1.29618	7.07086	0	7.04668
MYO16	2.22451	0	2.15553	0.00943726	0.133753	0
BIVM	1.97897	1.41806	1.15153	1.33899	2.0011	1.61459
TNFSF13B	1.96401	1.76156	1.37202	1.51621	1.73311	1.83425
ABHD13	15.3142	10.4348	11.1645	6.14585	5.20554	5.94681
U3	0.185139	0.201827	0.141025	0.588172	0.0960928	0.141093
RAB20	0.584502	0.497438	0.763235	0.727692	1.33364	1.23442
CARS2	0.060975	0.0627569	0	0	0	0
TEX29	0	0	0	0	0	0
GRTP1	2.51855	3.57274	2.5161	3.12643	3.39401	2.72798
TUBGCP3	0	0	0	68.4402	81.7569	66.8844
F7	0.0493464	0.0300976	0.0210483	37.7093	20872.8	0
F10	0.0152496	0.00709253	0.00745425	0	45.0457	0.0947488
ADPRHL1	0.895726	0.792666	0.0225293	0.0305956	0	0.0223627
MCF2L	0.0637925	0.0974313	0.645064	0.829857	0.0212969	0
DCUN1D2	6.28707	6.87615	5.64388	0.127139	0.909493	0.558457
PCID2	5.63745	6.39721	5.01498	0.0825434	0.0353772	5.72203
LAMP-1	0	0	0	6.03526	0.0289275	0
CUL4A	0	0	0	7.36385	7.65226	0
ATP4B	0	0	0	34.9198	8.66321	0
GRK1	1.5777	1.52578	1.53786	0	51.2635	7.2498
FAM70B	67.4224	2.65623	2.66579	0	0	1.63008
TMCO3	41.8963	0	0	1.80226	0	44.9105
COL4A1	29.2403	9.59444	1.15349	3.48756	1.80805	3.43484
GAS6	0	1.07209	3.08333	7.01101	3.98617	36.6481
COL4A2	1.04597	94.0204	99.6364	0	3.1965	0
RASA3	15.2282	39.3484	3.2687	4.35075	1.3349	2.94655
MPHOSPH8	2.81377	5.16531	2.33837	3.56097	4.09693	5.04452
PSPC1	2.89538	2.65375	2.75747	3.03946	4.80812	2.53175
ZMYM5	2.72845	2.31522	0	1.81243	3.09903	3.33699
PARP4	0.868905	0	0	0.808843	2.60858	0
ATP12A	0	0	1.01288	0	0	0
7SK	0	0	0	0	0	0
TEX19	0	0.948774	4.57849	0	0	1.5797
C17ORF101	0.798076	0.46589	0.0161003	0.730729	5.9401	0.949193
HEXDC	0.0132125	0.0153246	0.064079	0.0214181	0	0
RNF17	0.0515006	0.0524557	0.831919	0.115547	0	0
CENPJ	0	0	2.93064	0	0	0
C17ORF62	1.99681	1.77361	53.4056	3.87077	3.6972	2.50814
NARF	0.352298	0.191704	3.03968	0.219279	3.89572	0.451338
WDR45L	3.25439	2.23191	2.04023	2.32397	3.86193	2.38244
FOXK2	5.08397	5.45729	5.22406	5.28886	3.03245	4.94731
FN3KRP	10.5091	10.527	8.66973	10.1652	7.09909	11.8417
FN3K	0.637489	0.272629	0.582692	0.97679	13.1924	0.850097
B3GNTL1	0.266763	0.509377	0.316179	0.985666	1.1075	0.981341
METRNL	0.270857	0.0878446	0.184356	0.160734	1.76076	25794.8
SLC16A3	0.0522258	0.0163272	0.167068	0.0995814	0.167276	0.0471336
CCDC57	1.52711	1.92712	1.92275	2.46374	0.161022	0.156746
TBCD	0	0	0.0483425	0.00936734	3.78586	2.84103
ZNF750	3.79521	4.10871	4.26007	5.29802	0	0.00967136
CSNK1D	46801.5	51007.5	50690.6	41860.4	6.65615	3.9039
FSCN2	0.0329745	0.122943	0.0966987	0.0795325	0.273225	0.120187
C17ORF70	0.585548	0.471388	0.581245	0.699313	0.72108	0.449996
NPLOC4	7.17859	8.84318	6.95514	10.3006	14.9898	10.6425
BAHCC1	0.170037	0.289975	0.384119	0.275798	0.33372	0.229313
AZI1	0.668675	0.179001	0.653583	0.280724	0.399915	0.338444
AATK	0.00397758	0.0360251	0.00848769	0	0	0
ssc-mir-338	0	0	0	2.59487	3.21813	0
BAIAP2	0.381103	1.87919	0.837436	1.52826	2.23638	1.40451
SLC38A10	2.62088	2.80354	3.88765	5.65645	4.563	4.56624
CHMP6	1.81357	4.60982	2.05215	3.3084	7.47049	3.13149
RPTOR	2.60403	3.2926	3.32363	3.5907	3.85891	2.8833
RPTOR	1.27942	2.06067	1.4688	1.95442	2.11597	1.7184
NPTX1	3.46368	1.38062	2.23276	1.87137	0.011741	0.330934
RNF213	0.550529	0.795806	0.70383	0.730384	1.14609	0.780135
SGSH	1.51802	0.693305	2.53725	1.56979	2.44362	2.49871
SLC26A11	2.86952	0.825023	3.3696	1.92272	2.79969	2.50742
CARD14	0.011429	0.00580252	0.0304663	0.0176945	0.00521234	0
EIF4A3	5.16757	0.0151702	4.85345	4.54111	4.96142	114.208
CCDC40	0.0730553	1.10756	0.053111	0.0719609	144.829	4.65799
TBC1D16	1.14024	7.67259	1.61098	2.86981	0.0848435	0.0447069
U6	0	0	0	0	3.65024	2.26497
ENPP7	0	0	0	0	0	0
BETA-ACTIN	0.655179	0	0.111029	154	0	0
CBX2	0	0	0	0.702864	0	0
snoU2-30	0.160535	0.0880793	0.667803	0	0.182185	0.630233
CBX8	0	1.06985	0.917784	1.02782	1.13752	0.75342
CBX4	16.925	3.03976	153.466	0.0716237	2.00294	0.138799
GAA	2.40306	0	12.5058	3.44541	4.49192	5.15561
SGSH	0.504989	0.938238	0.0350424	0.56572	0.862657	0.766276
SLC26A11	3.49684	0.734422	2.47233	2.30049	3.41743	3.02721
USP36	0.534987	0.478949	0.0134405	37.6239	32.4102	39.7871
CYTH1	3.33759	3.49928	4.05103	0.033968	0.00996193	0.0116852
TIMP-2	0	0	0.794855	3.6256	4.5019	3.76344
U6	1.94876	3.40497	0	0	0	0
2022-09-09	0.672766	1.38395	2.86896	4.43808	1.15847	3.13878
MGAT5B	0	0	1.09459	1.14338	0	0.82261
SEC14L1	555.002	833.771	0.00571253	0.00552912	6.57361	0
SCARNA16	6.39528	4.42509	667.411	528.274	256.207	368.999
MFSD11	187.341	253.706	3.23869	4.09974	8.00553	6.53698
JMJD6	324.549	3.91606	1.80745	3.36309	4.17513	2.69032
ST6GALNAC1	1.4448	493.936	15.9052	15.5743	17.2064	0
snoR38	0.00927257	0	2.92923	2.63238	4.77791	0
snoR38	0	38.9918	0	0	0	0
snoR38	0	3.60485	0	0	0	0
ST6GALNAC2	0	0.644545	0	0	0	14.9627
SRSF2	0	0	0	0	0.0646125	0
METTL23	0	0	0.45402	0.320728	0	0.104076
CYGB	1.78371	0	0	0	0.409873	0
AANAT	18.8421	0	1.10522	0.838144	0	0.411348
RHBDF2	3.78192	1.63272	0.209721	0.279598	0.283275	0.209739
UBE2O	0.122384	0.204083	1.1297	1.41254	1.97806	1.30648
SPHK1	1.14671	0.982496	3.13777	7.15725	4.18181	2.73531
QRICH2	2.47211	2.05318	0	0.00697972	0.00618026	0.00360768
FOXJ1	0.00338342	0	0.108754	2.64722	0	0.020395
FAM100B	0.121116	0.161847	2.25167	0.0987101	1.37874	0.192242
RNF157	1.77456	2.69545	0.226375	1.79715	0.177115	1.94103
GALR2	0.033172	0.169665	0	0	0	0
ZACN	0	0	0.350855	0.47025	0.198944	0.150455
PRPSAP1	0.156662	0.303054	3.88073	15.8683	4.97979	4.25937
EXOC7	13.255	16.1269	17.0164	4.16298	20.9779	19.2191
EVPL	3.94401	4.9696	0.371366	0.140912	0.139534	0.199969
CDK3	0.235773	0.309884	1.18259	1.42755	12.2868	7.03927
C17ORF106	1.74276	1.35961	4.27691	8.12152	3.39012	2.51607
TRIM65	4.6455	4.92251	11.108	12.0908	12.6399	0.409236
SRP68	14.0531	16.8211	0.409069	0.57687	0.697478	12.4963
FBF1	0.464973	0.437421	0.149674	8.11346	0.340128	8.40768
U6	6.44187	8.61897	0	0.36462	0	0.299381
MRPL38	0.314629	0.152329	7.01876	0	11.4542	0
TRIM47	0	0	0.252817	515.092	1.5192	0.552134
UNC13D	421.617	1.34901	0	2.99562	0	0
UNK	0.220321	0	0.207866	0.380551	0.21714	0.169409
ITGB4	0	0.198023	63.3234	0.223658	0.00272638	0.0135266
GALK1	0.216601	65.8413	0.00954775	67.9988	7.28433	4.99609
C17ORF109	66.6867	0.00605709	7.81077	0.012314	0.66937	0
SAP30BP	0.00596958	6.65705	0	5.4806	3.96521	2.6718
RECQL5	3.46642	0	2.00339	0	2.89044	3.57526
SLC25A19	0	1.81652	2.15646	2.70144	22.7949	1.52162
MIF4GD	2.27566	3.04637	727.891	3.12886	19.8326	10.3527
WBP2	2.13949	19.9979	16.5488	14.0626	1.87517	19.972
MRPS7	17.5822	2.48167	52.4296	2.07186	12.4106	87.8779
H3F3A	1.35557	14.3005	1.88552	14.4947	80.1782	29.2196
GRB2	11.7382	14.9303	10.1095	46.0552	15.2515	11.0768
GGA3	8.19428	1.36602	9.05671	13.4298	1.97393	1.62784
NUP85	1.67288	3.79445	1.37389	1.29971	2.26337	2.2765
FASN	2.60894	0.415452	4.04003	2.73857	17.4178	17.0677
HN1	8.6993	0	0.426177	16.9741	0	0
SUMO2	0.163557	0	18.7769	0.276508	0	0
NT5C	0.23642	15.3419	0	0.318898	0.358217	0.856529
ARMC7	0	74.579	0	0	0.73727	0.265246
SLC16A5	0	0.285138	0.398717	0	1.13541	0.359898
KCTD2	0	0	3.4066	0	0.0231881	0.075881
OTOP3	0.0254131	0	0	5.79236	6.38059	6.24945
OTOP2	5.80599	0.144481	0.0541942	0.0996558	0.164084	0.129551
C17ORF28	74.4103	0.4292	0.248718	0.386124	66.5007	64.0465
CDR2L	0.310998	712.319	73.5085	71.1927	0	732.322
USH1G	0	94.4832	0	0	0	0
FADS6	0	0	0	0	1.85188	0
GRIN2C	0	0	0.285164	0	0.00279325	0
FDXR	1.50576	0	0.00652062	0.25429	0.797819	88.6611
TMEM104	0.0030578	0	0	0.0031537	0	1.83684
RAB37	0	1.3279	0	0.0134325	2.75558	0.542011
NAT9	0	0.396973	2.84194	0	0	0
CH242-307O4.3	2.84494	0	0	0	0.00622897	0
CD300LF	0.220654	0.600964	0.0190868	0.474131	0.0272083	0.367159
SLC9A3R1	0.00683337	2.63446	0.0846181	2.49158	0.130239	0
CD300C	0.0238671	0.00605907	0.0120949	0.0307949	0	0.0120998
CD300LB	0.0476064	0.0752213	0	0.114983	0	0.18306
BTBD17	0	0	0	0	0	0
KIF19	0.0187622	0	0	0	0	0
DNAI2	0.00981463	0	0.0104659	0	0.356546	0
TTYH2	0.0186962	0	0.615455	0	92.7244	0.0800849
ACOX1	130.871	0.277525	121.223	132.62	100.588	0.458161
SDK2	127.994	149.373	0.00270662	780.03	0	0
CDC42EP4	0	0	0.856642	0	0.175365	0.319931
FAM104A	1.1675	1.67716	1.22299	0.91889	2.01756	1.05611
C17ORF80	1.30454	1.13407	0.886155	1.35914	1.54883	0.842802
SSTR2	1.03886	1.3781	0	1.14173	0	0
COG1	0	0	3.85184	0	6.74551	0
SOX9	5.2028	0	0.34288	5.45791	0.495638	0.187041
SLC39A11	0.0668211	0.267049	6.40956	0.611831	0	0
U6	4.69939	0	0	0	9.35055	0.76828
U6	0	6.83372	0	5.48229	0	7.84198
U6	0	0	0	0	0	0
MKK6	0	0	1.86115	0	0.199606	0
ABCA5	0.271453	0.223219	0.0749899	0.777019	0.0380623	0.172253
U6	0.876089	1.01297	0	0.811629	0	0.0525367
FAM20A	0	0	0.332478	0	0.0211204	1.70687
ABCA9	0.519115	0.836056	0.714831	0.567326	0.221868	0.28619
U6	0	0.696477	0	0.614139	0	0
RPL38	0.788289	0	1294.85	0	811.751	0.305938
ARSG	5.83891	3.87198	6.70843	1139.76	0.555544	0.00916843
SLC16A6	0.91793	0.983426	1.00938	46.6466	0.00392434	1101.18
WIPI1	0.00429901	0.00872712	0.00458383	6.9477	7.55542	6.57718
PRKAR1A	1482.01	56.2174	40.3485	0.533152	41.2681	36.916
AMZ2	50.6245	1721.19	0	0.00887082	14.9298	12.1756
CEP112	12.9254	10.9757	0.771891	11.5401	0.187376	1.00168
AXIN2	0.536034	0.128871	10.0668	1.33583	4.20402	0.134357
APOH	0.12576	0.488321	0	11.0389	0	0
APOH	0	0	0	0.520051	0	0
GNA13	0	0	8.10399	0	14.9993	9.71019
PRKCA	12.6915	13.2802	0	0	0	0
CACNG5	0	0	1.87586	0	0	0
CACNG1	0	3.07459	0	0	0	0
CACNG4	2.11081	0	0.0186906	4.0248	4.44085	3.91553
HELZ	0.00500134	0	2.63233	0.00516104	3.05493	2.58867
U6	3.00498	3.33397	0	3.09547	133.12	0
PITPNC1	0	0	13.7106	0	7.04755	5.0643
5S_rRNA	16.2259	3.86737	2.58679	5.9794	0	0
PSMD12	4.80216	0	0	0	5.34328	4.81014
NOL11	5.27366	27.7017	4.16307	29.8473	8.85624	7.38205
SNORA50	1.34482	9.29063	6.84783	8.04503	3.81479	2506.36
SNORND104	7.79124	109.003	2470.89	2417.18	0	112.334
PECAM1	5555.31	9562.22	151.349	154.767	88.4272	5.03609
SCN4A	116.897	7.34381	2.32966	0	0	0
PGH	0	0	0	0	0	0
CD79B	0	0	0	0.00624035	0.00829088	0
ICAM2	0	0.160466	0.00967703	0.48341	0.0659766	0.157437
ERN1	0.174489	1.13645	0.130392	0.75361	1.02314	0.845021
TEX2	0.738221	1.39517	6.62583	7.96336	12.1712	11.1853
FTSJ3	8.44081	13.0248	1.38467	11.594	1257.36	4.91706
DDX42	5.79118	6.59762	5.72779	5.11199	6.27862	26.1616
SMARCD2	27.3587	31.8981	24.4294	30.3071	25.7089	5.03956
PSMC5	3.69456	5.66589	3.22933	6.26306	6.5249	4.67222
STRADA	7.31378	7.28562	4.8143	5.49284	5.47376	0.230947
LIMD2	1.75645	1.58967	0.0355079	1.7219	1.69873	1.87636
MAP3K3	0.116531	0.152582	2.01786	0.189594	0.226379	1.00851
ACE3	1.41577	2.14133	1.33872	1.18165	0.980486	2.25963
KCNH6	1.92727	0	2.13672	2.88755	3.36145	0
TACO1	0	0.00587682	0	0	0	0
CYB561	0	2.95747	0	0	0	0.0506459
DCAF7	2.32358	2.48822	0.0651034	3.23224	0.13605	3.65467
TANC2	0.0542717	0.179151	3.37907	0.175103	3.34046	0.189558
TACE	0.0310411	0.0644208	0.0210616	0.194986	0.0541956	0
2022-03-10	0	0.164639	0.0181297	0	0.364804	0.142942
MRC2	0.169281	0	0	0.362712	0	1152.17
MRC2	0.147821	0.574444	0.319123	0.514824	0.165787	0.181048
CCDC47	0.160737	0.731969	0.626969	0.461732	0.324514	0.415551
EFCAB3	0	44.7432	0	0	0.0133522	46.8222
C17ORF57	0	0	37.6067	0	0	3.12071
MYL4	0	0	0	0	0	0
METTL2A	2.90976	3.58251	1.30627	1.56822	2.01349	0
TLK2	45.9375	0	2.30698	3.51902	0.180609	0
CD61	1.61197	2.15993	0	0.188446	4.2031	1.32604
CDC27	0.0584184	0.379576	0.207053	60.7497	64.6146	0.0483872
KIAA1267	0	4.79764	0	10.0575	0	0
SPPL2C	0	0	0	0	4.16301	0
CRHR1	0.0173641	0.0088228	0.0277738	0	0	12.7245
ARL17A	6.85096	0	6.54142	0	13.4745	1.32577
MAPT	5.03662	13.9002	1.54337	12.9624	3.98239	4.26133
WNT3	2.37403	3.96715	4.49885	3.8579	0.26401	11.33
NSF	0.0485237	0.181171	0.120748	0.150697	15.3823	0.241643
LYZL6	1.7876	2.2755	1.88266	1.78025	2.5572	1.86221
RPRML	0	0	0	0	0	0
TTN	0	0	0	0	0	0
ARHGAP27	0.0733283	0.0136129	0.00526293	0.104877	0.0809087	0.0285779
PLEKHM1	0.883177	0.92263	1.09345	0.907841	1.08463	1.0532
GOSR2	0.0334018	0.145497	0	0.122765	0	0
C17ORF46	0.0120904	0.0150569	0.0133555	0	0	0
MAP3K14	0	0	0	0	0.212016	0.0128917
FMNL1	0.0358929	0.088497	0.0328041	0.0899117	0.929397	0.021872
HEXIM2	0.374006	0.706718	0.324746	0.660635	0.0150585	0.411883
HEXIM1	3.43292	3.25492	3.09032	2.42526	4.39561	3.37926
ACBD4	4.12308	10.6243	8.04807	7.65782	9.94626	6.20668
PLCD3	4.07944	5.59674	6.98287	4.63439	2.36769	6.13505
FASN	1.76398	1.31323	2.2121	1.50975	12.6222	1.45353
C1QL1	0	0	0	0	0	0
FAM187A	0	0	0	0	0	0
KIF18B	0	0.00678632	0.0380312	0	0	0.0335333
GFAP	0	0.0422552	0.0167568	0.049088	0.00609119	0.00633954
CCDC103	0.0888503	0.0225875	0.071061	0.0229617	0.191896	0.254734
DCAKD	1.10569	2.03666	1.58616	3.94344	8.10157	4.44573
HIGD1B	0.10242	0.210421	0.109259	0.106981	0	0.109526
U6	12.7911	0	0	0	0	0
ADAM11	0	5.14138	0.0427656	0.0069012	0.0243749	2.69499
GJC1	0.00668445	0.0203675	7.84979	2.8374	2.04369	0.0213869
C17ORF104	5.38345	0.329472	15.0877	0.425513	0.509157	0.309514
DBF4B	0	0	0.0403803	0.140193	0.177588	0
NMT1	0.112293	0.0465465	0.356844	0	0.0618369	0
SLC4A1	3.41752	1.2383	0	0	0	0
GPATCH8	0	23.7782	1.06215	1.22068	1.54211	1.39058
EFTUD2	1.25424	13.9094	12.8903	13.3854	16.0578	15.5694
FAM171A2	0.0948402	0.0160596	0	0.0489747	0.00720001	0.00842955
RUNDC3A	0	0	0.117985	0	0.00526866	0
GPIIB	0.286131	0.0727978	0.0928418	0.0657899	0.0607524	0.0491567
GRN	11.3649	12.8438	14.4324	13.4143	16.2485	15.3266
TMUB2	8.18799	10.3207	2.70909	2.7558	4.12591	2.55572
C17ORF53	3.83416	3.1704	11.495	17.0711	0.0383051	0.0673794
SLC25A39	0	0.0107032	0.0112258	0.0326412	24.1038	3.24198
UBTF	3.39151	1.23865	2.92666	1.30769	1.74371	20.7615
ATXN7L3	1.46088	4.01186	1.31762	3.66281	4.63022	1.32337
G6PC3	3.30093	3.5378	3.65886	5.11331	6.74322	5.93236
HDAC5	5.31149	4.66284	5.1276	0	0	0
PPY	0	0	0	0	0	0
PYY	0	0.132351	0	8.17808	0	0
MPP2	0	0.0172817	0	14.608	0	0.0329432
MPP3	0	18.268	0	0.00439156	8.71152	14.873
C17ORF105	0	0	11.8118	0	0.00388569	0
LSM12	0	0	0	0.00809411	17.0168	0
CD300LG	0.13484	1.28931	0.159752	0.7011	0.0760839	0.444885
NAGS	0.0545234	0.0487048	0.0606196	0.0468467	0.0788513	0.0257261
TMEM101	6.05941	4.79714	4.4886	5.23917	5.48808	5.35743
SOST	0	0	0	0	0	0
MEOX1	0	0.0540332	0	0.0183111	0	0
ARL4D	0.158046	0.190102	0.229836	0.148662	0.117378	0.122644
ETV4	0	0.015446	0	0.00785055	0	0
DHX8	9.19448	13.2772	8.79294	2.68502	2.58928	2.4656
DUSP3	3.04324	3.49447	2.81158	19.0822	20.6596	16.8963
IFI35	2.46728	4.51705	2.55509	2.59244	1.74931	1.62188
RND2	0.855739	0.458532	0.560415	0.77915	0.982794	0.732992
PIGBRCA1	0.453567	0.815544	0.459118	0.90297	0.792897	0.780518
RPL27	46.0953	41.6832	42.1619	37.1607	34.0266	42.8
VAT1	0.392455	1.03238	0.528234	588.606	423.939	517.479
NBR1	29.2412	34.7637	25.8829	34.4249	30.296	32.0847
U2	2.79783	6.4852	12.9387	2.08567	2.06372	1.26506
RUNDC1	6.40353	11.6151	8.18155	7.62242	7.00789	6.48069
U2	4250.11	6672.97	4275.87	5141.8	3346.17	4746.98
U2	4377.77	7020.73	4461.88	5234.96	3403.13	4816.24
AOC2	3.69595	3.2403	3.78182	2.97795	1.54528	1.14567
PSME3	4.70283	8.32556	5.49674	6.68513	8.1304	6.31525
BECN1	18.5145	19.8049	16.056	19.3154	20.9378	16.5986
RAMP2	5.2125	6.24323	2.82953	3.23833	0.471625	1.25184
CCR10	0.0823764	0.0335554	0.0878526	0.0682277	0.0896247	0.0175815
CNTNAP1	0.0812892	0.0660759	0.121353	0.0419798	0.0592365	0.034681
PLEKHH3	0.207958	0.715611	0.529714	0.816845	0.795587	0.271057
PSMC3IP	0	1.57354	0	0.155457	0.895325	0.0797586
TUBG1	10.1768	31.4527	0.828443	1.13616	20.8201	11.8146
WNK4	5.17752	3.58388	20.5089	30.2365	2.64018	1.09065
CCDC56	0.865499	5.78999	3.22794	3.59448	4.28953	22.4388
EZH1	5.14123	17.0686	14.767	15.5591	0	5.09737
FAM134C	8.92954	7.21703	5.07182	5.92911	8.13854	5.96796
HSD17B1	12.9	0.195827	0.274025	0.107825	0.131679	0.059958
NAGLU	0.369412	0.969527	1.39289	0.815898	0.833763	0.609016
COASY	1.61132	5.33245	12.8924	5.74049	7.05826	15.7776
MLX	5.07543	19.0243	5.76066	16.5925	21.3842	5.67049
STAT5A	8.066	210.941	153.686	5.97698	5.18278	3.96491
AOC3	222.846	5.70194	8.84769	7.50182	189.945	166.942
STAT3	9.75807	7.96108	8.86245	238.679	8.0276	6.72007
HCRT	0	0	0	0	0	0
KCNH4	0	0	0	0.320389	0	0
GHDC	0.528073	0.418591	0.3358	0.00581642	0.414461	0.31007
STAT5B	0	8.48404	0	9.27404	8.60884	7.00204
HSPB9	0.0870823	0	0.0265328	0	0	0
DHX58	0.622303	1.84215	0.0750821	0.093815	0.29158	0.0614634
KAT2A	10.9506	1.14889	10.5938	1.73436	2.50949	1.98638
ZNF385C	0.190797	0.157239	0.158176	0.166233	0.139259	0.159604
NKIRAS2	5.00763	4.365	3.7116	6.55851	5.26383	4.77608
DNAJC7	48.3059	61.8226	32.848	38.7738	34.6877	24.2245
CNP	3.83107	8.46826	4.07781	10.7633	21.6055	18.1147
TTC25	44.271	40.8246	37.4855	24.4577	36.322	20.6147
GAST	0	0	0.143315	0	0	0.0719307
HAP1	0.642661	1.37989	0.926595	0.243135	0.181296	0.164133
FKBP10	1.83722	1.25456	0.666613	0.82416	0.668808	0.121291
LEPREL4	3.23994	2.37859	1.66018	1.56687	1.98013	1.13025
JUP	1.75977	5.15607	5.86949	8.70574	14.1668	11.3711
KRT14	0	0	0	0	0	0
HKA1	0	0	0	0	0	0
HKA1	0	0	0	0	0.0026867	0
HKA1	0	0	0	0.00438433	0.00265735	0
KRT32	0	0.0129384	0	0	0.00245199	0
KRT36	0	0	0	0	0.00258396	0
KRT35	0	0	0	0	0	0
KRT13	0.0113594	0	0	0	0	0
KRT15	0.0137962	0	0	0.131205	0.0626354	0.0294401
KRT19	0	1.63671	0.313326	2.67555	0	0
KRT39	0	0	0	0	0	0
KRTAP3-1	0	0	0.191638	0	0.0231469	0
KRT25	0	0	0	0	0.0297437	0
KRT27	0.0274498	0	0	0	0	0
KRT28	0	0.0129591	0	0.0112683	0.010932	0.0719191
KRT26	0.0539252	0.0137177	0	0.0139454	0.145845	0
KRT10	0	0.0244672	0.0292732	0.0283967	7.53403	6.98843
KRT23	0	0.130424	0.0329614	0.0773405	0.0367301	0
KRT24	0.0128513	0	0	0	0.0420575	0
KRT222	0	0	0	0	0	0
U6	0	0	0.0288972	0	0	0
KRT20	0.00825941	0.00839238	0.0786686	0	0	0.00880951
KRT12	0	0	0.00880722	0	0	0
CCR7	0.0494032	0.384851	0.0132975	0.306176	0.269989	0.15808
TNS4	0	0	0.00810997	0.0078543	0	0
SMARCE1	7.69642	7.57807	6.39304	6.15204	7.60686	5.41032
GJD3	0.0134687	0.0550195	0.0287335	117.341	0.0242816	0
TOP2A	0.0145312	0.064873	0.0402833	0	0.0371705	0.0526794
CDC6	0.0146523	0.642457	0.600101	0.0419618	0.020029	0.468607
RARA	0.315673	0.0148844	0.0312477	0.0151302	0.573294	0.0312545
IGFBP4	123.392	155.676	104.867	0.525339	10.323	102.025
THRA	5.16967	5.9892	5.93919	5.95798	4.14656	3.9983
NR1D1	0.374595	0.632256	1.33906	0.879188	1.35786	1.03256
RAPGEFL1	0.0522075	0.00378452	22.455	0.0307744	0.0442676	23.3379
CASC3	33.861	40.2215	0.0397613	44.2659	100.791	0.0477164
MSL1	4.01861	5.13665	4.07912	3.00967	3.14386	4.19741
EIF1	3.87313	3.94143	3.34338	5.70387	6.73626	2.48623
WIPF2	0.946247	1.06402	1.01171	1.07881	1.43618	1.11542
CSF3	0	0.19974	0.0132889	0.175365	0	0.0397226
SNORD124	0	0	0.838592	0	1.16692	0.974636
CSF3	0.137282	0.423747	0	0.191317	0	0
SNORD124	0	0	0	0	0	0
GSDMA	0.0143162	0	0	0	0	0
PSMD3	208.925	24.2988	14.1637	19.4952	23.7762	17.879
ZPBP2	15.2273	0	0	0	0	0
GRB7	0	0	0.0334468	0	0	0
IKZF3	0.424163	0.0335997	0	0	0	0
ERBB2	0	0.638762	0.805006	1.27797	1.70647	30.537
MIEN1	20.4453	38.3492	20.1663	41.0897	41.9522	2.2299
TCAP	1.61316	0.148898	0	0	0	0
PNMT	0	0.0260474	0.0389659	0.0189225	0.066185	0.0194966
STARD3	0.345221	0	0	1.03333	0	0
PGAP3	0.0173536	1.66902	0.945142	1.30876	1.70252	1.4148
PPP1R1B	0.824755	88.2231	4.28612	64.6153	53.04	65.7156
CDK12	6.79922	7.33061	81	6.26987	5.85991	4.47572
MED1	5.72674	6.53728	4.97088	6.08178	7.03258	5.15187
STAC2	0	0.00951873	0	0	0	0.00998955
FBXL20	5.06864	5.28564	4.57262	4.09052	4.54521	4.94518
CACNLB1	233.691	0.0482572	0.0394183	0.0272514	0.033728	0.0506872
PLXDC1	0.107036	0.639845	0.413778	0.138397	0.121516	0.099926
NPEPPS	0.13203	10.3684	807.9	13.2922	12.2156	15.6962
TBX21	18.6338	0.00989137	12.1157	0.02011	0.00885577	0.0103798
OSBPL7	0	0.268889	0	0.383955	0.385125	0.463891
LRRC46	0.460192	1.47786	0.618414	0.168941	0.016416	0.193414
SP6	0.217471	0.129244	1.66737	0	1.76408	1.79583
SCRN2	1.72276	0	0.193279	0.664156	0.0637285	0.131355
TBKBP1	0.140666	1.81205	0.0187524	2.01094	2.09275	1.97816
MRPL10	1.49063	13.7388	0.82711	8.08662	9.37074	8.89569
PNPO	4.72272	0	4.75144	12.2375	431.081	13.9907
PRR15L	10.139	11.3265	0	0	0	0
RPL19	0	0.213242	10.6675	487.02	18.2658	500.454
NFE2L1	17.7176	0.0688246	14.492	0.0174926	0	32.4181
SP2	0.0506823	32.5893	0	0.250143	0.409039	0
SKAP1	0.273857	2.35239	0.1718	48.6529	49.5829	0.309428
CDK5RAP3	1.24244	11.3587	1.2024	2.91407	13.3729	11.5314
SNX11	11.4011	687.864	9.90942	13.1832	4.4873	2.5349
KPNB1	7.54681	13.4582	7.38199	27.1041	28.19	23.1597
CBX1	22.6216	30.9998	17.4398	11.4012	11.9198	8.30374
COPZ2	34.2646	58.9259	31.9465	51.9337	30.5673	25.5847
ssc-mir-152	0	0	0	0	0	0
HOXB1	805.766	0	699.733	0	0	0
HOXB2	57.6838	0.136245	0	0.455129	0.345823	0.265003
HOXB3	0	0.273353	0.427765	0	0	0.206947
ssc-mir-10a	0.45838	0	0.222742	0.262458	0	0
ssc-mir-196a-1	0.298377	0	0	0	0.379065	0
HOXB9	0	1.16753	0	0	0.161844	0
HOXB8	0	0.0135442	0.00710972	1.0387	1.14079	0.839837
HOXB4	0	0.306362	0.991593	0.0934562	0.00607851	0.128054
HOXB13	0.643614	0	0.319744	0	0	0
TTLL6	0.119898	0.763742	0	0	0.0228021	0
HOXB5	0	3.7994	0.706049	0.0932606	0.142056	0.0262652
HOXB6	0.0574588	0	39.234	0.639416	0.948009	0.408162
HOXB7	4.99655	0.116766	0.0525169	4.61399	5.98526	3.16164
STAT5A	0.131121	1.09436	0	0.468137	2.28062	1.73218
STAT5A	0.996986	6.13473	0.515689	1.89664	4.08	2.96386
STAT5A	2.12325	2.68971	2.97107	6.73649	2.79521	2.71498
GHDC	9.28889	0.336059	9.30482	3.67401	0.324646	0.205192
GHDC	5.05728	1.79034	4.71772	0.270001	1.27713	0.702109
NFE2L1	0.391014	94.1748	0.278335	1.16776	116.345	92.7985
snoU89	1.63967	0	1.57401	130.998	0	1282.89
CALCOCO2	0	50.4965	0	0	188.302	0
UBE2Z	126.09	8.9788	37.1124	11.3867	13.9585	175.016
SNORA11	47.5926	361.348	7.98586	174.359	57.1078	0
GIP	14.0207	0	158.975	0	0	0
ATP5G1	184.318	0.0453512	192.065	0	0.0243781	0
PHOSPHO1	0	0	0	0.046101	0	0.174824
ABI3	0	2.30169	0	75.0941	28.1572	0
SNF8	0	22.3265	0.0291228	257.111	3.199	70.1787
ZNF652	24.1564	298.634	18.9145	21.4396	0	22.6405
NGFR	0	0.296092	0	0	0	0.021423
NXPH3	0.108983	0	0.542415	0.22577	93.9706	0.0775419
SPOP	0.00812064	15.7012	0	0	11.5911	0.00577428
SPOP	10.1417	24.2109	9.66552	13.3611	24.6127	10.7328
PHB	4.14112	0	0	0	0	0
FAM117A	0	0.414698	19.824	0.67599	0.969534	21.4637
TAC4	1.13114	0	0.906584	24.246	0	0.854578
DLX3	0	0	0	0	0	0
U6	0	0	0	0	0	0
ITGA3	0.00676382	0.0707816	0	0	0.345383	0
MYST2	2.59101	3.44526	3.51964	2.82325	3.31913	2.63302
SLC35B1	3.72277	0.14598	0.236618	0.0906416	4.41658	0.150812
SAMD14	0.275953	4.99199	2.80854	3.71939	1719.82	3.79124
CH242-301O20.6	0.0820513	0	0.0437482	0.169596	0.241827	0.185995
PPP1R9B	0	8.4011	0	0.0905075	10.8663	0
PDK2	4.72046	5.49791	3.85196	10.7625	0	7.44145
COL1A1	0.194054	10.857	11.7794	0.924953	0.683087	1.58918
TMEM92	1.59119	0	23.7207	3.07302	3.25436	8.24139
CH242-301O20.3	0.568446	28.1774	0.09087	2.48745	8.8794	17.3596
SGCA	2.60541	0.0645983	33.2238	10.1902	0	0
HILS1	0	20.5547	0	0	1.85777	3.83441
EME1	21.1771	0.0107817	8.40946	0.455495	0.309414	0.181835
XYLT2	0.241426	0.539887	0	0.0219205	0.0192918	0.0226241
MRPL27	2.23591	0.147331	0.0729021	0.0749088	0.0806894	3.50734
LRRC59	8.01382	17.3611	0.318437	37.0461	3.65523	0.153081
MRPL27	2.33379	27.2828	3.15754	20.1933	6.19299	4.38279
EPN3	13.1672	1839.23	10.828	4.60418	23.811	20.9756
RSAD1	0.728217	0.00960923	0	0.00488409	0.0215129	0.00504217
MYCBPAP	0.00787829	0.922823	0.814873	0.622292	0.875825	0.738395
EPN3	0.00409839	0.0115429	0	0.0469328	0.00518457	0.00606156
CACNA1G	2.89163	3.35853	3.22679	3.74812	4.17347	3.58954
ABCC3	0	0.00440505	0.0115747	0.00671617	0.00793733	0.00462985
SPATA20	0.627902	0.9432	0.518195	0.852603	1.60039	1.30123
WFIKKN2	0	0.152406	0	0.130027	0	0.132706
ANKRD40	0	19.5028	0	0.0620834	0.0295694	0.0345485
LUC7L3	0.134222	0	0.0690902	0	21.5725	7.30261
TOB1	3.87918	0	3.46863	12.2881	15.7995	8.07176
SPAG9	5.16045	7.90743	8.94516	6.80554	0	7.06149
NME1	17.1961	0	5.35424	21.4271	6.32735	16.5641
ACSF2	87.492	6.65643	29.4804	99.4505	37.0083	29.0363
CHAD	0.186962	22.8891	71.291	0.25179	133.714	139.613
MBTD1	26.887	57.6267	0.199398	41.9307	0.440183	0.51881
CA10	0	0	0	0	0	3.40623
UTP18	7.11911	5.07863	5.324	3.7413	0.00202474	0.00473348
KIF2B	250.891	17.4823	0	12.9581	8.24297	7.32162
U6	43.3909	0	0	0	0	0
STXBP4	0.611593	0	0	0.571958	0.598922	0.399331
NME2	0.448148	0.920438	0.265597	0.318652	0.275722	0.328893
STXBP4	0.214268	0.308149	0.267478	0.647736	0.628219	0.220347
HLF	0.922436	0.318456	0.218529	1.62158	1.36135	1.67011
TOM1L1	4.7292	4.16378	3.24795	427.018	405.107	384.595
ACLY	5.2379	4.68295	3.56211	4.12982	4.73563	4.23842
TMEM100	0.3367	0	0.0700649	0	0	0
CH242-289H7.1	0	0.0167256	0	0.068016	0	10.5027
ANKFN1	0	0	0	0	0.21593	0.297961
CH242-99N13.1	0	0	0	0	0	0
C17orf67	63.5822	35.008	47.4862	27.3204	16.8144	0
MMD	260.33	108.898	131.686	155.918	195.085	111.04
TRIM25	3.30009	0.692391	0.73447	2.45313	0.421912	1.94341
COIL	3.03036	3.42925	3.03064	0.549676	2.6139	0.583803
ORF	0.959883	0	0	0	3.0796	0
DGKE	4.00062	1.02249	0.934987	0.924974	1.17628	1.09279
5S_rRNA	0	0	0	0	0	0
MSI2	8.83898	10.2767	3.49622	12.4654	17.2765	7.24821
VEZF1	0.440145	0.249613	0.2456	1.15899	1.01642	0.94655
VEZF1	1.54716	1.50016	0.991346	1.11062	1.23588	1.11562
U1	1.57878	0	0.905963	0	1.53851	0
SRSF1	147.259	1.63205	31.9923	1.05458	52.4396	0.986872
DYNLL2	36.1271	81.9227	121.461	225.228	251.742	47.4834
SCPEP1	24.46	92.4907	23.6261	64.1898	63.1167	0.705595
U1	0	0	4.76833	0.639839	0.769257	0.705595
U1	0	0	4.1191	0.639839	0.769257	31.6748
U1	21.8222	26.157	4.1191	0	25.6084	0
U1	0	0	0	0.639839	0	0.705595
U1	0	0	0.588443	0.639839	0	0.705595
RAD51C	1.59601	1.04899	0.820368	0.639839	0	0.89803
U1	0	0	0.588443	1.3117	0	1.20655
U1	0	0	1.61822	53.6972	1.36755	29.1218
U3	62.2376	51.045	82.6271	3219.21	17.4365	3982.83
U3	10016.3	21346.9	150.982	12819.3	3166.36	360.419
U3	18782	20265	19737	18742.4	20911.5	25894.7
C17ORF47	0	0	0	0.00902775	0	0.00932143
2022-09-04	0.153501	0.896194	0.139532	0.591971	0.198797	0.328128
HSF5	0.00402355	0	0	0	0	0
RNF43	0.138223	0.137763	0.110534	0.201865	0.0621887	0.0409342
MTMR4	2.46878	2.52236	2.01094	1.80002	1.91187	1.62531
ssc-mir-142	0	0	0	0	0	0
LPO	0	0	0	0	0	0
CH242-73D9.1	0.0235461	0	0	0	0	0
EPX	0	0	0	0	0	0
MPO	0	0	0	0	0.0143007	0
CU571372.3	0	0	0	0	0	0
CU571372.2	0	0.373077	0	0	0	0
CU571372.1	0	0	0	0	0	0
BZRAP1	0	0	0	0.519393	0	0.0059355
MKS1	0.13079	0.0090737	0.0624195	0.0717646	0.807165	0
SUPT4H1	14.1239	15.1008	13.7022	15.6644	14.0545	14.4761
PPM1E	2.07e-12	6.33e-16	4.12e-13	0.0176959	0	0
TRIM37	8.01538	7.17854	5.76977	7.25518	7.91941	5.59959
TEX14	0.352765	0.255658	0.182069	0.669118	0.478046	0.731683
U1	0.277847	0.297639	0	0	0	0
U1	0	0	0	0	0	0
U1	0.277847	0.297639	0	0	0	0
U1	0.277847	0.297639	0	0	0	0
U1	0.277847	0.297639	0	0	0	0
U1	0.277847	0.297639	0	0	0	0
U3	3545.25	4143.87	2131.26	5183.86	3768.8	5405.96
GDPD1	23.9207	0.678665	26.3471	0.639399	0.38582	0.399647
PRR11	0.207711	9.19821	0.22583	0	0.0150919	0
ssc-mir-301	0	0.0169536	0	9.11612	0	0
DHX40	2.32907	6.40795	3.35793	7.53735	2.27413	1.97992
CLTC	15.5206	45.6609	3.7105	4.85615	48.89	36.3776
PTRH2	5.44141	6.53732	6.28123	7.1111	8.95605	7.36851
TUBD1	1.46865	1.7853	1.23578	1.85047	2.26372	1.60349
VMP1	5.4797	9.87779	15.8915	27.6863	8.06509	12.5113
ssc-mir-21	28.6275	12.1153	0	0	0	0
RNFT1	0	53.3592	5.58224	9.57272	12.438	6.65519
RPS6KB1	8.6672	0	8.7953	14.6493	20.7321	14.6603
U3	41.3272	12.3572	8.05862	8.58476	9.46803	6.45538
MED13	9.23246	0	0	7.76623	0	0
MED13	7.57541	0.129211	0.134459	0	0.450854	0.314321
TBX4	0	0.453271	0.54367	0.262781	0.77653	0.679756
BRIP1	0.565622	0.391165	0.40565	0	0.627581	0.379689
ssc-mir-378-2	0	0	7.17864	0.402642	9.32176	4.41574
TBX2	0.312157	14.3579	0	8.10492	6.61602	0.0712369
INTS2	0.0666847	2.94685	10.9061	0	0.0598926	4.39217
C17ORF64	4.63466	5.28768	42.127	4.09457	4.02398	2.2623
BCAS3	2.97604	1.82613	3.68116	2.12285	1.93943	0.756528
PPM1D	0.96474	10.4428	4.69877	1.34655	0.944403	6.05315
CLTC	9.41722	4.53228	4.88778	6.02175	8.51869	0.220795
APPBP2	2.4082	0.413355	0.0183875	0.517756	0.502472	0.320552
SNORA43	9.4198	0	2.26075	0.232711	0	0
USP6	0.150286	1.00099	0.31382	0	3.82206	7.06075
ZNHIT3	0	14.1701	0	70.7627	17.1871	11.5446
MYO19	14.9048	669.873	11.8056	13.4305	269.696	272.676
SNORA11	805.292	76.9955	540.115	345.803	3.89633	2.7021
DHRS11	0.00211051	0	2.98167	0	5.45896	5.04289
LHX1	3.29465	2.7975	2.33902	4.17985	2.41781	1.96574
MRM1	1.86332	2.31665	1.72304	1.98502	13.3924	9.44079
AATF	11.7601	12.7434	10.0173	11.8471	20875.5	57.726
GGNBP2	193.123	51012.5	332.803	41866.8	76.4451	25796.1
ACACA	0.100139	546.344	0.0534061	440.391	678.112	477.976
C17ORF78	0.67468	0.051107	0.44395	0	0.0451807	0
TADA2A	1.44242	0.650146	1.31654	0.764915	1.00334	0.574377
TADA2A	1.4067	1.64036	1.16877	1.5894	1.8257	1.33057
DUSP14	0.0395432	1.41582	0	0.948299	1.34964	0.994943
HNF1B	1.08388	0.00669362	0.837076	0.00680406	0.00600844	0
DDX52	2.39188	1.63515	0	1.16555	1.77464	0.777763
HEATR6	0	2.33105	1.93195	2.24973	2.51907	2.10386
RPL12	1.61896	3.57099	0	3.57062	0	0
SYNRG	3.35657	0	1.91638	0	3.26705	3.13003
U6	0	0	1.39198	0	4.42364	0
CCL4	0	18.1945	0	8.41535	0	3.26066
CCL3L1	0	13.3775	0	7.31583	0	0
CCL16	0.381779	0	0.851317	0.0499759	5.62549	0.15357
CCL23	0.0104376	2.98105	0.0111303	1.91601	0.923267	0
C17ORF66	6.15263	0	8.29921	0.0107876	0	1.12912
CCL5	5.74976	11.876	4.9646	6.14979	2.92262	1.48052
TAF15	0	7.58906	0	4.91063	5.71025	3.75003
snoZ30	1.24916	0	0.988262	0	0	0
PEX12	0.0771752	1.21188	0.140022	1.08624	1.53677	1.08306
UNC45B	0	0.254576	0	0.406646	0.0555665	0.413767
FNDC8	0	0	1.23852	0	0	0
SLFN11	1.06845	0.163703	0.0374024	0.0313495	0.522594	0.0349089
NLE1	2.32892	2.00595	1.40386	2.19523	2.70743	1.92383
RAD51D	8.51395	2.06254	0.795619	2.20173	3.18189	2.84555
CCT6B	0.560131	2.33729	1.03613	1.39064	0.806855	0.406573
U6	0	1.81832	0	1.46358	11.4936	0
ZNF830	0	0	3.76264	0	0	11.2294
SNORA70	0	8.89116	6.00187	7.10282	7.67417	5.63911
CCL11	7.18338	6.04711	0	0	0	0
CCL1	6.68858	3.41982	0.781083	0	0.782218	2.69968
RFFL	1.92328	0	1.71512	0	0	0
CCL8	0.837987	0	0.595889	8.52587	1.19129	0
SPACA3	0	0	0	0	0	0
U6	0	0	9.90722	0	7.00409	8.12292
TMEM98	0.0266473	0.311803	0.241546	23.5037	6.54308	0
CDK5R1	0	0	0	0.0551266	0	7.05597
CCL2	0.0121056	0.0860523	0.0322701	0.112463	0	0
MYO1D	0	0	0	0	0.0165596	0.0322753
U6	9.57833	83.941	8.21401	24.9613	0	0
PSMD11	0.384067	12.0163	0.0540015	10.9656	11.5998	10.5235
RHBDL3	16.4918	0.0471218	2.38988	0.0304803	0.0154114	0.027003
RNF135	0	1.65089	3.05827	2.19033	2.5343	2.6698
C17ORF75	3.62963	4.18414	18.3999	4.51384	4.87421	3.82876
ZNF207	5.6647	28.7323	0	23.1256	0	23.653
ADAP2	4.13657	0.573215	4.24754	0.23542	0.244456	0.212838
TEFM	5.75136	4.76149	4.18055	5.25685	5.54629	3.59228
RHOT1	4.4187	5.55376	3.54239	4.58778	4.83965	3.53888
SUZ12	83.5338	4.6675	0	4.41414	4.67259	3.91126
CRLF3	0	0	14.3784	38.8688	40.5579	29.8599
C17ORF79	9.23908	14.7219	6.63683	0	0	0
ssc-mir-365-2	68.6112	61.9851	40.2295	26.3207	20.5926	22.4935
UTP6	16.543	0	0	0	0	0
ssc-mir-193a	0	0	0	0	0	0
snoU13	0	12.6535	2.35899	16.3437	17.4455	11.7993
RAB11FIP4	0	3.60602	0	3.3899	4.53199	4.33205
5S_rRNA	2.93715	0	50698.4	0	0	0
UATP.I	0	0.220076	4.44209	0.19921	0.340119	0.0967394
NOS2A	0.083194	1.0605	0.3745	0.0590793	0.0281439	0.27879
KSR1	0.0264281	0.0715349	0.148684	0.29724	0.504857	0.0610599
WSB1	0.374061	18.239	0	18.8165	16.2316	10.8358
NF1	22.3267	5.59612	0.0654959	6.56794	7.05274	5.6514
EVI2A	46813.2	0.541969	0.0846135	0.325564	0.253142	0.297145
EVI2B	6.84185	0.218106	0.139391	0.332577	0.165844	0.194505
U6	0.266414	0	0.084537	0	0	0
OMG	0.214508	0.145698	9.63197	0.264482	0.121076	0.141957
UNC119	0	1.93542	3.07288	1.55578	1.18791	1.33693
PIGS	3.71698	1.72872	2.4342	1.73413	3.44835	3.4117
IFT20	0.363055	13.7222	0.4141	1.04774	16.156	12.8887
TNFAIP1	0.207854	4.70507	0.153059	0.246669	3.76755	3.21856
SPAG5	0.438995	238.997	0.103303	0.190635	233.435	211.394
KIAA0100	0.0268507	0.0454252	0.0334013	0.0461733	0.0490164	0.179659
RAB34	3.40281	5.79713	4.57209	5.63587	6.72236	5.42799
SDF2	0.0175832	0.0179113	0	0	0	0
ALDOC	15.79	16.926	13.6656	19.4588	21.8128	16.545
ACACA	7.5191	10.6041	6.72162	9.04337	9.37063	8.72739
U6	343.085	699.901	493.522	527.046	425.664	404.914
TLCD1	0.169637	0.0472972	0.0658031	0.208407	0.0970993	0.115301
NEK8	0.318848	0.245441	0.239779	0.180188	0.235592	0.20761
TRAF4	0.767166	0.35991	0.422952	0.774509	0.773866	0.743159
C17ORF63	0.285989	0.137322	0	0.0698111	0.455351	0.469154
U6	0	0.264187	0.312752	0.349336	0	0
PHF12	0.511804	0.582017	0.499262	0.438079	0.772328	0.421881
ssc-mir-144	0	0	0	0	0	0
U6	0	0	0	0	0	0
ERAL1	0	0	0	0	3.52357	0
ssc-mir-451	0.771998	0.515077	0.286449	0.87294	0	0.609555
PIPOX	0	0	0.533713	0	0.00953873	0
TIAF1	3.53589	0.765599	0	1.14182	1.44705	1.09726
SNORA72	0	0.384202	0.44064	3.06788	0	0.665837
MYO18A	1.27297	3.15327	3.67282	0	2.69914	3.64716
FLOT2	0.659408	0	0	0.681197	1.85732	0
5S_rRNA	0	0	0	0	0	0
NUFIP2	11.9909	12.3285	8.34811	11.8408	16.0731	9.94074
TAOK1	6.08651	6.73682	4.85772	7.86351	8.75297	6.83038
TP53I13	2.99988	0.565671	6.18147	3.02889	3.94149	2.53778
ABHD15	0.770372	3.8972	2.6617	6.06515	1.84863	7.11611
GIT1	10.6035	6.79873	0.524594	1.04763	11.4612	0.927405
ANKRD13B	0.147248	0.183953	0.207008	0.380329	0.411914	0.250321
CORO6	0.242567	0.44654	0.0899577	0.68951	1.09003	0.483664
SLC6A4	0.0303798	0.0693714	0.0850295	0.0235044	0.0693498	0.0364435
BLMH	23.4351	19.1252	5.61055	19.7339	23.5152	0
EFCAB5	0	0	16.5687	0	0	0
SNORA57	0	0	0	0	0.026974	0.188268
TMIGD1	0.269747	0.223978	0	0.269403	0.303986	19.6726
NSRP1	4.22563	4.97484	0.192179	5.29565	5.88518	3.94439
ssc-mir-423	0	0	3.46601	0	0	0
SSH2	5.44686	4.05164	0	7.99234	5.93776	6.05398
GOSR1	27.2172	30.5387	15.6936	16.756	21.7956	21.934
CPD	26.45	15.189	28.9993	36.1846	64.0954	50.5839
SNORD42	0	0	0	0	0	0
snoZ17	0	48.9064	69.6206	88.1525	0	93.1748
BHLHA9	1.55301	2.89929	1.92583	2.83906	0	3.00588
U6	0.0218857	0.133328	0.134183	0.191995	0	0.0991922
ABR	3.18669	8.35825	4.5049	7.30081	3.33676	4.96602
TUSC5	2.02793	0.530731	1.35006	2.98368	0.159722	1.94917
NXN	0.897178	0.954819	0.674255	1.19367	7.69379	1.27953
TIMM22	1.95393	2.1895	0.960914	3.18536	148.441	1.95189
CT120	0	0.0336261	0	0.273545	8.72499	0.140469
RNMTL1	0.20935	0.851696	0.232781	1.45895	1.67543	0.299753
GLOD4	2.40125	6.89114	4.99379	6.77665	10.5664	5.86446
C17ORF97	6.51234	19.7105	7.34857	11.3041	0.0886127	1604.84
FAM101B	0.868801	3.10026	2.37129	2.43717	0.609252	0
SKIP	7.5491	1.00274	0.701761	1.1711	7.51834	0
VPS53	0	16.4155	13.319	11.8114	10.8865	13.0226
SLC43A2	1.63131	0	0	0	2.61586	2.18456
SCARF1	14.1147	13.3313	9.9443	13.2518	0.689201	0.86618
U6	0.0215324	0	0.489876	0	0	0
RILP	0.587055	0	0	0	13.7146	13.6182
RTN4RL1	0	0	0	0.0148527	0.0586367	0
DPH1	0	0.0253481	0.057635	0.607349	1.30712	0
ssc-mir-132	2.43304	3.11861	2.7064	0	0	0
ssc-mir-212	0.901689	0.98572	1.39424	0	0	1.09616
HIC1	0	0	0	0.120246	0.0795231	0.070954
SMG6	5.52808	7.39833	5.67303	1.31665	1.32209	1.61122
U6	12.5049	29.2334	19.5295	0	0	0
RPA1	0	0	0	5.8196	6.96123	6.02856
PAFAH1B1	0	0	0	31.4796	23.777	21.0297
RAP1GAP2	0	0	0	0	0	0
ssc-mir-4335	0	0	0	0	0	0
OR1K1	0	0	0	0	0.0196679	0
ssc-mir-4335	0.0666329	0	0	0	0	0
OR3A2	0.110593	0.022559	0	0	0	0
SPATA22	0.00741125	0.00717793	0.01507	0.611754	0	0.124862
TRPV1	2238.34	2515.75	2014.02	9.90156	0	0
TRPV3	0	0	0	0	0	0.0150731
KIAA0664	0	0	0	0.00729641	3.31772	10.4585
ASPA	12.3703	8.37764	1.7302	7.33928	11.8594	5.63249
SHPK	1.95767	1.27544	4.18315	1.37209	1.42316	1.35084
CTNS	4.22982	3.24454	9.10125	4.78017	4.91012	5.29001
TAX1BP3	8.81316	0.296741	14.2319	11.9976	9.39954	8.17942
TMEM93	1.10931	16.6039	1.90927	47.7717	48.1376	45.1402
ITGAE	6.39681	5.68417	3.7685	6.1287	7.10961	5.80572
P2X1R	53.3118	46.3456	53.6889	4.23316	0.0058495	0.0102631
ITGAE	0.809573	0.0219908	0.0346027	0.0349754	0.0696238	0.0543181
CAMKK1	0.00320779	0.258764	0.258995	0.50219	0.988368	0.764963
C17ORF85	2.30253	2.04629	2.35505	3.53906	1.36822	3.1625
U6	0.0536967	0	0.0190893	1.86924	0	1.56365
ZZEF1	0.0158775	4.28234	2.24582	0	4.30635	0
ATP2A3	2.72772	0	0	0	0.0216964	0.0592713
P2X1R	0	0.104856	0.033861	0.0163982	0.011375	0.00667785
CYB5D2	1.54462	2.59165	2.68017	2.11516	2.71252	2.94419
ANKFY1	2.09818	2.72803	2.06325	2.69932	3.38928	2.70783
5S_rRNA	0	0	0	0	0	0
SPNS3	0	0	0	0	0	0
SPNS2	0.0197264	0.0501315	0.0105176	0.0101922	0.00885577	0.0105211
UBE2G1	8.60313	12.3587	7.0379	16.1414	19.432	14.2356
GGT6	0	0	0	0	0	0
TEKT1	0	0	0	0	0	0
7SK	0	0.0157636	0	0	0	0
FBXO39	0	0.099685	0	0	0.00687768	0.0330445
SMTNL2	0.00754804	0.0587586	0	0	0.0131006	0.0080504
SLC13A5	0	0	0.0643885	0.0155894	0	0
XAF1	0.183943	1.08702	0.0784713	0.381083	0.116617	0.121522
MYBBP1A	2.60196	4.1076	3.17819	3.26627	3.98412	3.22673
MED31	5.95932	8.32244	5.00066	9.71057	9.62215	8.15567
FAM64A	0	0.014389	0	0	0	0
AIPL1	0.007049	0	0.010021	0.0121144	0.0128356	0.00751574
KIAA0753	0	0.592267	0.022436	0.0144835	0.738013	0.651694
WSCD1	0.930545	0.0641175	0.710507	0.565407	0.0255707	0.0299208
TXNDC17	105.068	121.521	95.8439	107.697	82.2833	87.5183
ZNF594	0.520067	0.114037	0.228356	0.105386	0.148448	0.184924
ZNF232	0.11727	0.00993391	0.0729468	0.0403931	0.0266806	0.0208487
C17ORF87	0.1126	0.848471	0.582927	0.47551	0.0659386	0.66007
U6	0	0.147093	0.06861	0.0664547	0	0.0600488
ZFP3	0.808761	0	0	0	0.729937	0
RABEP1	0.100695	76.4275	45.0326	81.0434	63.0671	56.7108
U6	71.1936	0	0	0	0	0
INCA1	0	0.206031	0.179031	0.0698352	0.0602936	0.107569
CAMTA2	0.786057	0.780685	0.986834	1.07695	0.956773	1.31589
ENO3	0.748814	0.8688	0.68647	0.720162	0.536986	0.588683
SPAG7	19.7134	28.2372	17.0968	22.0542	18.6888	14.5407
KIF1C	8.72244	13.5782	7.06131	18.9881	19.0279	0.0633534
GPIBA	0.0816756	0.0377144	0.0316696	0.0306697	0.0879591	17.4985
CHRNE	0.0505899	0.508219	0.640649	22.3328	27.017	19.9687
C17ORF107	0	0.0479982	0.0249469	0.634367	3.33985	1.41007
OMC	0.782281	0.609611	17.7234	0.0244035	112.787	0.0250005
PLD2	16.6378	0.505474	0.762234	0.40383	2.03398	0.244537
ZMYND15	0.1532	1.69451	0.682965	0.0333115	0.485663	0.773913
MINK	1.96758	27.8189	1.67108	2.11786	0.0514146	3.44256
CXCL16	2.52261	4.07009	1.66215	2.19232	1.18885	91.5836
ARRB2	0.158059	8.62714	6.9049	0.327216	1.9679	0.635016
MED11	10.3627	0.177024	0.134851	7.7622	3.2074	0.252997
RNF167	0.0362452	0.15694	0.183615	0.168941	0.172031	6.17097
PROFILIN	0	0.0479982	0.0249469	0.0244035	9.78721	2.40692
C17ORF107	66.8384	153.248	91.9206	139.538	0.0208644	0.0250005
GLTPD2	0	0	0	0.193706	0	0
TM4SF5	0.281032	0.48828	0.437047	0	0.0851594	0.0624611
VMO1	0.0679867	0.313023	0.652736	0.176835	0.213671	0.145258
ALOX12	0	0.0847967	0.00635988	0.0123134	0.0108793	0.0127218
SNORA11	0.351615	0.705771	0	0.823455	1.1888	0
SLC16A11	0.174175	0.320576	0.21083	0.496113	0.981239	0.346471
ssc-mir-497	1.00214	1.66835	0	1.81926	3.39034	1.3782
ssc-mir-195	0	0	0.973116	0	0	0
BCL6B	0	0	0	0	0	0
SLC16A13	0.337671	1.08349	0.290847	1.06117	0.979233	0.540398
C17ORF49	4.65398	6.41076	3.92686	4.11654	3.72325	3.28975
ALOX12	0.038192	0	0	0.0315529	0	0
CLEC10A	0	0.0543205	0.0407247	0	0.0139193	0.0162937
ASGR2	0	0	0	95.274	0	0
PSMB6	16.5172	34.5992	24.8931	0.00702474	30.5988	34.5926
RNASEK	91.2018	129.906	92.974	52.6935	118.899	93.4391
CLDN7	0.494456	2.90868	1.27226	0.714893	0.733257	1.47401
CTDNEP1	2.19741	2.16004	2.33538	1.83647	1.8979	2.06274
SLC2A4	8.56025	24.7149	14.3175	24.5628	28.7622	21.2505
PHF23	2.68646	1.77219	1.41188	1.52356	1.89842	1.53152
YBX2	0	0.0220026	0.313215	0.387122	0	0.00767911
ACAP1	0.338182	0.598364	0.00769875	0.00745527	0.241886	0.303931
TMEM95	0	0	0	0	0	0
KCTD11	0.728926	1.06293	0.511519	2.38602	71.684	2.65105
PLSCR3	1.14393	1.05973	1.17429	1.48576	0.0809	1.49384
ACADVL	12.6586	9.71745	85.7036	87.7047	1.96581	11.252
ssc-mir-324	0	0	13.9169	14.0658	13.5996	0
GABARAP	98.5865	94.474	0	0	0	77.1958
C17ORF61	0.281548	0.286998	0.386079	0.270948	0.254752	0.107328
ZBTB4	4.04292	2.37329	1.44913	2.6368	2.61133	2.83555
CHRNB1	1.02502	2.93028	129.625	3.49473	2.85444	1.28391
FGF11	0	0	3.35583	0	0	0
C17ORF74	0.0123824	0	0	0	0	0
SPEM1	1.12761	0.35755	0	0.876036	113.377	1.05843
TMEM102	0.348695	0.238729	0.990785	0	1.273	0.606364
EFNB3	0.0181309	0.0296597	0.0128885	0.356179	0.303907	0.00644527
NLGN2	168.519	1.40731	0.101183	1.53445	0.00551153	114.499
WRAP53	1.68526	0	1.42818	0.0256175	2.0095	1.47636
ATP1B2	0	187.191	0	148.787	0	0
TP53	1.47657	2.77772	1.68211	1.67714	1.33587	1.49674
SAT2	24.4135	9.23633	11.2695	14.5852	14.1783	18.752
CD68	0.244556	0.366094	0.172714	0.109949	0.192396	0.244492
FXR2	0.0575232	11.1795	0.00766811	0.0148796	0.00652684	9.90048
SOX15	4.71635	0.0146365	4.13406	5.6937	6.37919	0.0460331
SENP3	4.62678	4.07622	3.56837	3.93798	4.31413	4.8652
DNAH2	0.159904	0.074202	0.155885	0.12717	0.156405	0.0341031
KDM6B	3.82637	4.81097	1.18998	0.179211	0.18985	0.161026
KCNAB3	0.111976	0.0543661	0.0726757	0.050238	0.0755276	0.0155751
ALOX15B	0	0.0104568	0	0.00266073	0.00939767	0.00549184
GUCY2D	0.0102998	0.0171406	0.00274559	0.0132864	0.00775472	0.00549895
ALOX12B	0	0.553164	0	0	0.0047049	0
HES7	0	0	0	0	0	0
CNTROB	12.29	0.0361763	0.812079	0.958176	0.796159	0.758837
TRAPPC1	1.3064	21.6348	14.6746	18.3055	17.4447	18.6205
CHD3	6.76102	6.48185	0.965205	1.02455	6.12671	3.43826
SCARNA21	71.473	83.8913	0.629201	8.32943	9.87016	20.2477
VAMP2	1.37682	1.08815	0.0526571	46.6367	1.44425	1.42925
AURKB	0.0493749	0.795134	9.32197	0	0.0895331	0
C17ORF59	0.628016	0.167603	198.04	0.768963	1.87806	1.32027
TMEM107	0.735978	0.46812	0.481772	1.2241	0.964851	0.392411
U8	2.72883	2.87049	2.38328	126.334	38.2614	1.40277
CTC1	240.612	143.544	84.1785	0.394122	0.306092	36.9733
PFAS	0.975305	1.28478	0.876186	1.36159	1.68983	0.933786
KRBA2	1.04703	0.370738	0.307471	0.40831	0.247822	0.392653
RANGRF	4.53081	4.46988	5.67204	4.97176	4.37863	7.71328
ARHGEF15	5.90058	11.5136	0.01124	8.11551	8.39641	0.022483
PER1	0.24504	0.161684	5.77479	0.110807	0.396351	4.59776
EIF4A1	40.2306	100.425	46.4503	52.5895	54.1806	40.6284
SNORA67	10.3673	0	5.4568	5.35862	3.96037	0
SNORD10	3255.85	4677.84	3201.3	2842.2	1380.74	1987.19
SNORA48	446.739	134.693	105.398	72.1695	61.6929	69.702
SNORA48	75683.3	66118.8	63959.2	45057.1	21328.6	41202.6
RNF222	0.0751716	0	0	0	0.0336869	0.0401606
NDEL1	1.3454	1.20122	0.80871	1.15109	1.28013	1.01752
U6	1515.66	4708.39	2612.52	3471.78	752.586	2200.59
MYH10	2.2174	3.54447	1.86662	3.02098	2.61214	2.49667
CCDC42	0	0	0	0.0106616	0.00938538	0
MFSD6L	0	0.010488	0	0.703167	0.0946627	0.0185805
PIK3R5	0.0121782	0.0288405	0.0129849	0.0251274	0.0259428	0.00865728
NTN1	2.60758	6.14233	5.2598	5.12894	17.5536	9.39793
WDR16	0	0.0265608	0	0.0810198	0.0469239	0.0277779
DHRS7C	0.0674786	0	0	0	0.0970342	0.0960481
USP43	0	0.147811	0	0	0.345529	0.109128
RCVRN	0	0.0225275	0.251815	0.162426	0.139747	0
MYH13	0.358192	0.26127	0	0	0.168225	0.0497088
GAS7	0	0.0135319	0	0	0	0.00710999
GLP2R	0	0.0028996	0.34764	0.00179407	0.808558	0.00507853
MYH1	0	0	0	0	0.0411689	0
NDEL1	3.46684	3.35518	1.17184	2.61023	2.21216	1.69542
U6	0	3.44315	2342.81	0	752.586	2355.22
SCO1	0.0805811	4406.91	3.10096	0.00146055	3.06302	2.51547
MYH1	3.04207	0.0234696	0.0237013	4.17142	0.0436276	0.011577
MYH3	1567.04	0.0526255	0.0515445	3495.56	0.0129386	0.107399
DNAH9	0.146505	0.0270545	0.0284032	0.0825026	0.103206	0.134941
ZNF18	0.444027	0.51297	0.484335	0.526689	0.679901	0.484393
C17ORF48	1.40357	2.41364	1.82474	2.91051	3.48234	2.29704
TMEM220	7.3573	6.10902	5.45629	8.72359	10.1459	6.44601
ELAC2	1.11317	2.58839	2.09351	2.92827	3.49894	2.58
MAP2K4	0.0208961	0	2.47573	0.0137174	4.20765	0.00405121
ssc-mir-744	0.485643	2.80858	0	3.22877	0	0.953715
ARHGAP44	0	0.288543	0.30821	1.2156	1.65868	0
U6atac	0.268037	0	0	0	0	0.55699
TEKT3	0	0	0	0	561.383	0
ZNF286A	0.890424	0.129518	0.37306	0.279805	0	0.339349
ZNF624	1.17638	1.0955	0.860381	1.23818	0.273997	0.643423
ZNF287	0.467378	0.370678	0.290703	0.50238	0.961969	0.264776
TRPV2	16.8906	0.245556	14.3289	0.309034	0.386524	0.153509
FAM211A	0.333954	21.8968	0.0982312	18.4845	0.236328	14.0995
SNORD65	3.08871	3.25869	2.56629	2.02791	1.04054	1.22691
SNORD49	0	0	0	0	0	0
FAM18B2	0.00196614	0	0	0.0292094	0	0
RPL26	1028.47	939.484	829.028	728.832	20.7537	655.861
CENPV	3.47944	3.30919	4.71033	3.64501	3.55176	2.7939
PIGL	0.548892	1.18073	0.708771	0.870434	0.702343	0.678751
NCOR1	0	0.0538476	0	0.15509	2.48489	0
TTC19	0.0257857	0.0262336	0.0412472	0.0133344	0.887356	0.0412664
SLC47A2	0.12926	0.793717	2.03357	1.04455	0.0117128	1.05664
ALDH3A1	2.21125	0.735241	0.475879	0.902238	0.0241229	1.12169
SLC47A1	0.61148	14.9259	0.756904	16.0014	24.0394	0.716077
GRAPL	0.874212	0.0108687	1.0863	0	0	0.0114031
ALDH3A2	0.844556	0	0.27551	0.136627	0	0.139455
ULK2	3.93591	3.84802	3.20845	0.101942	0.444477	0.109259
SLC5A10	0.327551	0.208703	0.0808826	0.0223451	0.0555628	0.0144457
FAM83G	0.0203173	0	0.0310206	4.36511	5.98667	6.35923
NT5M	0.598065	0.486815	0.581095	0.714848	1.21919	0.992593
COPS3	0.0237907	1.3662	1.41944	3.255	4.04498	0.0101479
SRCIN1	1.07695	3.4428	3.36867	1.40136	0.013027	1.36841
PEMT	3.68586	0.0579621	0.152202	0.019639	2.59549	4.16084
MED9	1.8776	2.31014	1.68498	2.05308	3.49369	2.66272
RASD1	0.371222	0.369416	0.357242	0.442286	0.318318	0.400166
ARHGAP23	0.260475	0.320376	0.267053	0	0	0.352552
CPNE4	0	0	0	0.480729	0.402229	0
SOCS7	1.05577	0.79708	0.825996	0.716799	1.07723	0.863348
NEK11	0.180431	0	0.288579	0.379435	0.158477	0.290488
ASTE1	1.49051	1.47874	1.30498	1.25779	1.11455	0.863756
MRPL3	20.3463	31.1322	18.9685	20.0289	19.6151	19.7695
U6	0	0	0	0	0	0
COL6A5	1.24134	0.0064094	1.10039	0.00434316	0.00192492	0
PIK3R4	1.61862	0.0826351	0.163926	0.0630201	1.97144	1.21272
CAPN7	7.80993	7.3709	5.98252	7.66613	9.26998	8.14268
SH3BP5	0	25.9358	17.7584	0	23.0027	16.4429
COLQ	23.9328	0	11.3809	23.2173	0	0
METTL6	15.9051	27.1501	0	2.95471	2.81503	1.82473
ATP2C1	5.25769	7.18502	4.4238	18.7265	20.9651	31.4913
HACL1	13.588	13.3984	9.93057	40.7819	36.8035	21.0727
GALNTL2	15.5592	0.0699524	0.0400621	0.0517136	1.029	3.74047
ANKRD28	1.03135	0.626231	0.649793	0.676813	23.3815	26.3167
DAZL	15.7343	25.1777	13.4566	0	0	0
DPH3	0.510753	0.492817	0.211874	0.148618	0.136984	0.133511
PLCL2	0.450682	0.381409	0.307022	24.5687	29.7007	4.77673
OXNAD1	8.09666	14.7885	10.0276	11.7822	9.96005	24.5649
U6	0	0	0	0	0	0
5S_rRNA	0	0	0	0	0	0
KCNH8	0	0	0	0.0318287	0	0
SATB1	0.0714915	0.0756752	0.191969	0	0.023502	0.0877578
EFHB	0.396102	0.0726079	0.0346504	0.0201289	0.035553	0.041588
TBC1D5	3.6963	2.63477	2.78374	2.38761	2.87322	1.98189
5S_rRNA	0	0	0	0	0	0
PP2D1	0.558445	0.519516	0.333074	0.459652	0.86153	0.454334
SGOL1	0	0.0759029	0	0	879.04	0
SATB1	0.123547	0.0214775	0	0.154368	0	0.178209
U6	0	0	0	0	0.166141	0
U6	0	0	0	0	0	0
ZNF385D	0.708079	5.35204	0.35038	3.83796	0	0.304517
U6	0	0	0	0	0.953689	0
UBE2E1	3.4685	6.17452	1.83051	5.79304	16.6974	4.21689
KAT2B	55.0297	43.3255	26.7777	76.6324	35.6956	50.3881
NKIRAS1	43.8149	33.6165	45.7446	34.6786	51.1428	85.8059
NR1D2	214.068	25.1035	18.9636	20.2878	127.495	878.22
7SK	26.8988	0	0.189895	0.189483	12.7727	15.6629
UBB	0.178247	0.0781964	961.2	0	0.154182	0
C-ERBA-B1	0.362865	0	13.5424	0.0698381	177.612	0.425995
RPL15	0	213.951	0.367648	1.55979	0.0612647	0
RARB	333.742	16.7949	288.572	1182.78	0	2.45e-07
5S_rRNA	0.033752	1219.68	0.0366944	19.3394	17.3794	14.8405
LRRC3B	0	0.0589291	0.0922812	0.0599205	0.0259664	0
NEK10	0.172702	0.238857	0.114468	0.110772	9.64877	8.92226
TOP2B	11.9759	12.7822	9.64389	12.3326	0	0
NGLY1	14.5063	11.3315	10.6368	13.3854	0	0
OXSM	8.40441	5.62951	7.4282	9.94234	0	0
EOMES	0	0	0.00439223	0	7.82427	9.54903
SLC4A7	4.6607	3.58281	2.69704	2.8176	2.29809	2.2319
AZI2	6.7955	4.91101	7.4726	4.0541	5.47775	5.99821
RBMS3	4.06095	8.70571	3.4368	7.48818	4.67492	3.77608
U6	0	0	0	0	76.5342	0
U6	0	0	0	0	0	0
U6	0	0	0	0	0	0
TGFBR2	24.4643	17.8194	13.9896	30.41	31.5815	18.9758
GADL1	0	0	0	0	0	0
U6	0	0	4.83996	0.341446	0.542393	0
TGFBR2	8.90087	7.96605	1.35547	13.0325	15.7449	8.29543
OSBPL10	0.0862756	0.274284	0.318896	0.362581	0.966851	0.530483
CMTM7	2.17823	5.19321	3.73364	3.16389	5.01714	4.92791
DYNC1LI1	3.97083	8.6013	4.05511	5.99218	0.86165	6.97473
CMTM8	0.505671	4.15092	1.37315	1.05522	0	2.0149
CMTM6	0	18.3847	0	14.3151	32.115	30.9823
UBP1	2.87942	0	1.98531	34.4876	0	0
GPD1L	21.1903	3.34568	36.3092	3.32416	3.84591	2.96605
STT3B	14.4393	15.9581	13.4545	12.2244	15.6913	20.424
CLASP2	0	0	0	0	6.47501	4.92387
U6	0	5.21176	0.019394	0.075343	0	0
STAC	0.0206596	0.0185269	0.0826076	5.24403	0.0494146	0.0194076
ARPP21	0	0.0209747	0	0.0373106	0.186143	0.179005
ssc-mir-128-2	6.95628	0	4.84776	0	0	0
MLH1	3.42975	2.88886	1.78343	3.5632	3.93967	3.45469
PDCD6IP	18.1962	15.1799	12.6404	15.8082	21.3351	18.418
EPM2AIP1	1.87398	3.25273	1.4456	2.06016	2.72112	1.26532
TRANK1	1.45517	0.809528	0.935693	0.714229	0.661673	0.612476
DCLK3	2.47254	0.729002	2.31456	4.70963	1.21977	1.60056
LRRFIP2	3.90715	4.60907	2.76737	5.94284	6.54999	4.92814
VILL	0.0868149	0.0377844	0.0793453	0.00640126	0.056546	0.0198397
DLEC1	0	0.08998	0.0642872	0	0.0712568	0
OXSR1	31.3571	5.23584	5.07832	31.6085	7.96979	14.1397
CTDSPL	11.6582	10.5341	11.6331	14.055	16.818	0
GOLGA4	43.1689	4.40622	26.2516	4.41458	0	28.2611
MYD88	5.59206	0	0	0.00673275	5.99738	0.00694515
SLC22A13	0	0	0	3.45458	0.00930941	0.00599083
XYLB	0.0102319	1.14574	0.0218267	0.615957	1.02485	0.0327554
SLC22A14	1.07263	0.268941	0.901197	0.173144	0.231975	1.00556
ACVR2B	0.211711	0	0.244571	0	0	0.263456
SCN10A	0	0	0	0	0	0
SCN5A	0	0	0.568897	0	0	0
EXOG	0	0.836186	0.00291243	0.801854	1.22409	0
XIRP1	0.0210868	0.0381594	0	0.013591	0.00684542	0
CX3CR1	0.0379258	0.0508102	0.0240319	0.0543054	0.0171691	0.00562085
CCR8	0.0600999	0.120942	0.0168624	0.0785852	2.55171	0.0240374
CSRNP1	0.443781	10.4588	4.79381	7.03533	0.159777	3.08668
SLC25A38	8.00204	0.298535	8.06159	8.117	15.2063	9.65522
SNORA62	125.743	5.56772	94.3381	0.646497	58.9411	38.9427
WDR48	9.77442	11.0342	7.4421	6.4671	9.966	7.91545
TTC21A	1.02799	46.4202	0.377444	72.871	0.653252	0.58652
GORASP1	5.96429	177.78	5.06429	14.3467	7.95911	6.47569
ACAA	0	197.95	0	148.53	120.914	0
MOBP	0	0	0	0	0	0
MYRIP	0.449995	0.0131381	0.185383	0	0.0117316	0.539857
ENTPD3	14.2279	0.212851	251.586	0.332453	0.26595	204.617
EIF1B	334.954	21.5005	9.65008	17.4778	17.8323	11.9547
RPSA	564.098	483.388	558.979	394.968	576.039	412.88
SNORA62	10.3959	40.9666	21.9472	39.9197	0	25.9083
7SK	0	0	0	0	0	0
ZNF621	1.47372	0.787132	0.731356	0.407654	0.609187	0.809597
U6	0	0	0	0	0	0
U6	0	0	0.376359	3.56699	0	0
ULK4	1.54032	2.30965	1.34415	2.42171	3.15553	3.74911
CCK	0	0	0	0	358.346	0
LYZL4	0	0	0	0	0	0
VPAC1	0.0355024	0.0127036	0	0.0129132	0	0.0066703
TRAK1	3.64052	2.54632	3.47693	2.48299	0	2.8126
SEC22C	5.34233	4.80928	3.21655	5.58656	4.15927	5.32963
RPL14	23.7036	497.495	37.9904	420.737	5.97085	417.856
CTNNB1	40.6245	51.1753	33.9992	47.9959	52.9887	44.2088
SS18L2	0	0	0	61.6226	59.7411	0
CCDC13	0	0	0	0	4.46866	0
HHATL	0.058066	0.0196744	0	0	0	0.0309693
KBTBD5	4.3515	3.64856	2.94095	0	0	59.9884
NKTR	1.73063	58.8361	1.52369	3.21444	0.00880767	3.357
ZBTB47	0.270793	2.51711	0.866352	3.16162	4.28013	0.410593
CCBP2	2.51943	0.464165	1.78696	0.353907	0.232883	2.74959
ZNF662	0.589134	1.16797	567.068	1.02982	0.596551	0.887599
C3ORF39	1.02009	0.631071	0.740417	0.685013	1.21539	0.538679
FAM198A	25.33	0.685111	0.576984	0.348219	0.185761	0.51092
HIGD1A	629.516	74.4515	38.2302	53.7604	52.523	38.4876
SNRK	26.8236	17.9875	20.2249	9.33502	11.8309	10.6397
ANO10	22.489	22.1391	14.8475	21.0632	15.877	18.1858
ssc-mir-138	0	0	0	0	0	0
C3ORF23	1.23771	1.00999	0.866191	4.20075	4.6688	3.80979
ZNF445	1.78082	1.28287	0.506239	0.764711	1.51751	0.0578229
ZNF502	0.488342	0.448235	0.304838	0.0562307	0.487194	1.40498
ZNF501	0.379045	0.304159	0.115519	0.381774	0.366052	0.406622
ZNF445	1.39382	1.61083	1.03698	1.03923	1.02391	0.797132
KIF15	0.0179894	0.0255585	0.0038362	0.00742259	0.0262849	3.72322
KIAA1143	5.52158	5.80883	4.3332	4.08818	4.13649	0
TMEM42	8.06951	6.11892	7.0156	6.95404	7.44402	6.10238
ABHD5	0.00906469	0.017108	0.0338284	0.404746	0.0296032	0.0048331
CDCP1	0	0	0	0	36.1134	0
CLEC3B	8.49782	7.66491	5.04386	17.2417	0	12.1268
TMEM158	4.98797	37.9543	12.8319	7.6141	9.64428	6.15748
LIMD1	3.91664	15.9128	12.1931	0.634651	0.703429	0.63949
EXOSC7	1.78322	6.57767	4.22003	18.1539	17.2345	14.7592
LARS2	13.8736	1.89381	1.35197	7.31196	7.25977	5.6685
SACM1L	0.00851015	8.90043	4.98119	0	9.23878	6.01921
SLC6A20	0	0	0	7.64695	0	0
CCR9	2.33146	0.0139785	0	3.54553	0	0
SACM1L	0.0641739	4.25772	2.15021	0	4.63699	0
LZTFL1	0	7.15881	5.32512	8.90515	10.9482	9.03001
XCR1	0	0	0	0	0	0
CCR1	0.0472743	0.114012	0.0127042	0.00410159	0.0108536	0
CCR2	0.0472989	0	0.0630096	0.060728	0	0
CCRL2	0.0146718	0.0524542	0	0.0156413	0.0133157	0.0338862
LTF	0	0	0.0968328	0.164688	0.0916201	0.0567175
CCR5	0	0	0.04694	0.105448	0.0621265	0.084741
TMEM7	0	0.35732	0	0	0	0
TDGF1	0	0	0	0	0	0
LRRC2	0	0.107625	0	0.0229363	0	0
CCR3	0.00663214	0.00503187	0	0	0	0
CCR2	0	0.0283011	0	0	0	0
MYL3	0.145605	0.0697899	0.0211136	0.0397995	0.0310508	0.0274213
PRSS50	0.175985	0	0.00424318	0.0886902	0	0
PRSS44	0.166317	0.0876238	0	0	0.00797071	0.18769
PTH1R	6.66566	0.177912	0.121344	0.162768	0.135251	0.0373471
ALS2CL	0.0546193	8.08308	5.20031	7.61324	0.0632402	7.11942
PRSS48	0.262217	0.0462594	0.0582428	0.0376194	0.154859	0.0388401
RSPH1	0.0773709	0.43094	0.106908	0.334516	0.230136	0.148062
FYCO1	0.686559	0.089148	0.00550036	0.0319849	9.1089	0.170571
CXCR6	0.456698	0.571982	0.228882	0.402667	0.0497252	0.0917273
TNFRSF14	16.3076	0.451687	0.210456	0.778075	0.291435	0.272359
NBEAL2	1.88511	0.246026	0.945616	0.276434	0.219721	0.217275
KLHL18	107.138	1.49867	1.25707	1.85063	2.62854	1.78758
SETD2	5.70931	5.51775	4.77806	5.19116	5.62649	4.95458
CSPG5	3.98527	3.78871	0	4.06456	0	0
SCAP	1.5974	0	3.38884	0	5.08905	4.0731
C3ORF75	0	2.60908	1.9922	1.81321	2.05442	1.61578
SMARCC1	2.92329	2.64703	2.49791	3.30526	2.76847	3.06427
DHX30	9.0173	3.76996	7.08528	8.78734	4.392	7.78529
MAP4	2.16819	3.1881	2.41384	4.84971	5.21087	3.98214
NPG1	0	0	0	0	0	0
NPG3	0	0	0	0	0	0
PMAP23	0	0.106152	0	0	0.0897456	0
CAMP	0	8.35724	0	0	0	0
NME6	9.39277	0	9.69046	9.97893	7.60323	7.52823
CCDC51	2.18981	2.67231	1.91666	2.84595	2.46167	2.03878
PFKFB4	0.642847	1.26558	1.32749	1.12835	1.77322	1.22999
COL7A1	0.0268421	0.047193	0.0324351	0.0276741	0.017994	0.00953949
CCDC72	212.54	275.16	168.305	214.386	166.247	190.378
TMEM89	0	0	0	0	0	0
TREX1	0.683374	13.811	4.08128	12.2849	1.35335	5.22245
SHISA5	0.496447	0.686054	0.465698	0.674665	0.802211	9.5447
SLC26A6	0	11.874	8.49741	9.10483	12.4913	0.663484
U6	10.656	0	0	0	0	0
CELSR3	0.0836686	0.0169726	0.0237887	0.0607906	0.0670222	0.05862
NCKIPSD	0.128518	0.0783136	0.0959265	0.159211	0.228497	0.239859
PRKAR2A	8.67744	64.2972	9.36375	10.6181	62.0039	12.1101
UQCRC1	55.7672	15.1919	70.1758	63.464	16.4433	66.5929
P4HTM	2.70031	2.95996	2.42959	3.20521	1.04854	4.06767
WDR6	12.603	0.935499	10.7574	0.94023	4.80718	1.47946
ARIH2	1.59441	14.0296	1.24745	11.5551	15.1858	0
ssc-mir-425	0	0	0	0	0	11.9476
ssc-mir-191	0	0	0	0	0	0
DALRD3	2.26543	3.74368	3.5754	2.75182	2.85293	2.03008
SLC25A20	21.1721	54.8414	46.6072	28.9523	48.3035	44.5169
NDUFAF3	69.463	31.4464	21.4005	61.4882	23.4289	22.1275
IMPDH2	13.0565	14.1359	11.0716	9.9722	9.2492	8.9334
QRICH1	4.80669	6.22155	4.65772	5.63965	6.36231	5.95592
CCDC71	5.20402	5.08082	4.85609	5.51983	2.08752	1.64954
CCDC36	0.0407353	0	2.99337	0.0424521	2.50212	2.07882
CCDC36	0.231728	0.110965	0	0.0282018	0.0364515	0
LAMB2	0.0557634	0.14187	0.261657	0.0288452	0.0990267	0.0148746
USP19	4.29929	7.54368	0.0594678	4.06035	0.0379724	0.203613
KLHDC8B	7.7618	17.8912	13.8545	9.00166	8.59282	12.6356
USP4	7.84407	7.43478	6.28777	5.74071	5.40116	6.00246
U6	0	0	0	0	0	0
BSN	0.0157823	0.0434872	0.0134617	0.0105758	0.0101002	0.0100959
APEH	1.03036	5.15348	2.26342	2.64351	6.26357	5.69025
MST1	5.5427	65.4926	5.46665	5.89933	3.79312	5.03071
GMPPB	2.61745	2.12257	4.06376	6.91357	6.84245	4.87329
RNF123	2.03906	0.598996	2.17081	2.50741	3.04913	2.68841
AMIGO3	0.466187	7.32288	0.405563	0.545498	0.947672	0.392652
CDHR4	0.0447796	0.0682361	0.047749	0.0462419	0.0272031	0.0159199
TRAIP	0.147859	0.107687	0	0.131384	0.133711	0.0901893
CAMKV	0.0111572	0.0453144	0.135172	0.0115154	0.0305326	0.00594916
IP6K1	4.18053	4.59963	4.53986	0.0473984	4.36746	4.50719
C3ORF54	0	2.31028	0.026957	0	0.0456043	2.16567
UBA7	1.22268	0.154788	1.17415	1.00746	1.75626	0.0269844
MST1R	1.6888	3.05758	2.72496	1.29146	1.61914	1.1209
GNAT1	0.077229	0.17709	0.144142	0.020005	0.0116517	0
SLC38A5	0.116363	0.0738781	0.286932	0.120156	0.0198835	0.519694
SEMA3C	1.04367	2.41754	1.52461	0.958276	0.230795	0.255968
RBM5	0.662905	14.6503	2.19054	12.4195	13.3924	10.3751
SEMA3B	0.21617	17.672	14.8551	7.26388	0.534865	5.01187
HYAL1	1.04222	0.684047	0.256136	0.248353	0.560222	0.269057
HYAL3	0.271378	0.498759	35.3776	0.366778	1.67815	1.4177
HYAL2	2.1898	1.67166	0.322779	1.76847	13.4755	1.60489
TUSC2	0	45.8674	1.92114	39.6886	3.9407	0.0166354
ZMYND10	3.70276	3.9014	2.86626	3.76488	5.96e-09	4.47358
IFRD2	0.0311792	3.68865	3.34582	0	5.07096	1.0409
C3ORF45	1.36559	1.84e-05	3.1e-09	4.11591	0.0424243	3.48243
RASSF1	19.9081	0	0.0498771	0.0322718	1.63629	4.06e-08
NPRL2	44.7441	1.15881	0.745518	1.85129	52.7999	4.78745
CYB561D2	5.29491	5.01994	3.7871	5.15267	6.2833	7.44171
RBM6	4.83726	7.72124	5.74346	7.75214	8.21219	0
CACNA2D2	0.0066776	0.0101642	0	0.0344379	0.0182967	0.19358
C3ORF18	0.120606	0.310287	0.0643242	0.252395	0.267418	0
TMEM115	3.38046	2.74412	2.35912	1.47806	1.59191	1.57317
HEMK1	8.90175	10.335	7.74178	10.6525	0.318195	45.5056
MAPKAPK3	2.35758	3.42145	2.34216	2.65996	1.98509	2.66569
DOCK3	0	6.24085	4.9947	4.8195	10.9925	9.90684
SNORD22	0	0.00290272	0.00305036	0.00295046	0.00522734	0.0122017
CISH	11.3077	0	0	0	0	0
RBM15B	3.46268	2.57323	3.12419	3.2193	3.57755	2.75062
MANF	4.18105	8.26667	3.16087	3.83679	3.7084	2.78645
VPRBP	5.47433	5.02962	3.92841	4.90467	5.32232	4.6603
GRM2	0	0	0	0	0	0
IQCF6	0.0347172	0.0211581	0.0296151	0.0286764	0.00632891	0
IQCF2	0.133824	0	0.0713687	0.210289	0	0
IQCF5	0	0.275766	0	0	0	0.573108
IQCF3	0	0	0	0	0.355176	0
IQCF1	0	0	0.192952	0	0	0.258096
RRP9	7.35557	6.44932	6.13845	6.11272	6.90817	7.02227
TEX264	1.27442	1.65185	1.28371	1.27609	1.49409	1.16243
RAD54L2	6.87253	9.14642	6.4778	6.53942	8.17945	5.94685
GPR62	0	0	0	3.9e-09	0	0
PCBP4	0.604602	0.461497	0.374803	0.783443	0.855487	0.504787
PARP3	2.31076	4.62996	1.99155	4.24975	3.2761	2.47278
ABHD14B	13.0164	13.7304	12.4635	15.339	13.1957	12.765
ACY1	23.3826	41.8418	39.7512	32.0958	35.6492	24.114
U6	0	0	0	0	0	0
DUSP7	0.4786	0.455813	0.230506	0.287623	0.406166	0.164742
POC1A	0.0506301	0.244655	0	0	0.356515	0
TWF2	0	0.187572	0.134981	0.317436	0	0.195627
ssc-mir-135-1	0.179885	1.98475	0.766553	0.191258	0.0388934	1.42708
Metazoa_SRP	1.87963	0	2.42319	1.35027	1.39447	0.526664
GLYCTK	1.37432	1.91376	1.49262	1.55982	1.55292	1.35729
TLR9	0.008687	0.00881753	0	0.00448136	0.00792971	0.00926334
PPM1M	6.74462	5.62512	0	1.72664	2.36866	4.89966
WDR82	5.84983	9.12816	3.07407	6.69692	6.9445	0
ssc-let-7g	0	0	10.107	0	0	6.67021
ALAS1	6.43627	16.5957	13.1858	11.7793	10.846	10.1647
PHF7	0.612818	0.279379	0.511038	0.202852	0.128837	0
TNNC1	0	0	0.0624855	0	0	0.243011
SEMA3G	0.671858	6.81628	0.586154	0.946133	0.43825	0.382718
BAP1	7.01387	1.54351	6.19942	8.60661	9.19803	8.6536
NISCH	7.03732	0.709737	6.21309	7.89883	0.719641	0.576546
STAB1	0.848244	1.90425	0.933088	0.655347	1.52743	1.4666
NT5DC2	1.23293	8.34715	1.19576	1.85347	8.04888	8.58097
GNL3	6.22381	7.11928	5.42411	9.57528	9.27714	6.9257
SNORD19	0	367.8	0	0	0	0
SNORD19B	0	17.7263	0	0	0	0
SNORD69	0	0	0	0	0	0
GLT8D1	10.0761	0	6.62096	7.61198	304.065	6.61026
RPL29	39.0562	0	355.808	338.779	5.56973	335.288
ITIH1	0.626053	62.4102	39.3414	49.3272	0.0997727	44.5529
SPCS1	387.992	0.561688	0.0972161	0.338807	52.3821	0.0388928
NEK4	11.9116	9.66873	7.04772	8.85672	10.9406	11.5159
ITIH4	2.71707	2.68131	0.15028	4.12387	0.0570652	0.0668071
TMEM110	0.164422	0.182959	2.26778	0.218326	4.09975	5.24085
SFMBT1	0.785187	0.433196	0.330588	0.569102	0.522025	0.517386
PRKCD	0.33211	0.721708	1.31262	0.985233	1.44052	0.705699
ITIH3	46.1563	70.6477	26.091	41.3332	33.3908	21.8512
SNORD63	0	0	0	0	0	0
CACNA1D	0	0.00385397	0.0121471	0	0	0.00404928
CHDH	0.0225057	0.0304844	0	0.00774694	0.0273432	2.76524
IL17RB	0.0709233	0.0991056	0.056721	0.0183171	0.129154	0.0560081
5S_rRNA	1011.04	766.177	672.154	601.266	173.424	0.0283686
ACTR8	4.77151	5.1678	3.98099	3.13463	3.17194	612.104
ERC2	0	0	0	0	0	0
CACNA2D3	0.0108642	0.62005	0	0	0	0
LRTM1	0.342841	0	0.595806	0.330253	0.327363	0.289444
WNT5A	0.609022	0.656877	0.649361	0	0.0340975	0
SELK	68.0715	61.307	46.7302	48.0849	36.1425	40.1602
ARHGEF3	1.557	1.34762	0	1.46252	1.5437	0
DNAH7	0.11025	0.144736	0.137142	0.18055	0.0869324	0.213202
IL17RD	0.87282	0.491914	0.293669	0.882766	1.16396	0.606281
PDE12	1.42351	2.66414	1.45252	2.76326	3.61285	2.26053
CCDC66	2.43964	2.71232	1.79073	2.1324	2.68833	1.62765
FAM208A	5.25487	4.98198	3.47791	4.0993	4.23559	3.19704
U6	0	0	0	0	0	0
SLMAP	5.5351	8.55025	4.40358	7.2464	8.01414	5.93322
FAM116A	2.89958	2.40553	2.26345	2.70122	3.02748	15.3727
RPP14	9.98657	15.1045	9.17397	16.02	21.7856	15.1844
ABHD6	45.6399	4.28934	5.23447	3.46976	73.461	66.3445
FLNB	2.32578	9.71079	9.5122	12.075	8.11233	9.21786
DNASE1L3	0	0.771714	0	0	0	0
ARF4	0	91.321	52.5677	81.5198	0.138932	0.222576
PXK	7.02569	13.1795	8.97197	9.29381	10.7043	8.7427
TKT	292.751	336.982	367.12	419.118	474.433	417.552
KCTD6	4.35323	4.9573	3.92761	3.43924	4.18325	2.86258
FAM107A	0	0	0	0	0	0
FAM3D	0.0836729	0.494245	0.160624	1.31683	0.242726	0.482178
C3ORF67	0.536287	1.22367	0.227172	0.341372	0.394987	0.32908
ACOX2	9.78517	8.90576	0	10.0076	0	0
5S_rRNA	0	0	10.8276	0	11.1202	14.0433
FEZF2	0	0	0	0	0	0
C3ORF14	0.608522	0.470951	0	0	0.838576	0
SYNPR	0.00793481	0	0.608412	0.758161	0	1.0189
PTPRG	2.38189	1.94854	2.64926	1.63366	1.33841	1.49908
SNTN	0	0	0	0	0	0
C3ORF49	0.024459	0.0249618	0	0	0	0
SCA7	0.427182	0.628256	0.556814	0.949871	1.3776	1.57014
ATXN7	144.295	1.2516	0.896511	0.870621	0.962222	0.760495
THOC7	1.05512	30.5257	17.087	22.8893	19.7851	18.1483
PSMD6	43.1549	6.11307	29.4808	4.80169	3.35405	3.04164
PRICKLE2	0.488615	0.858891	1.4494	3.19289	5.48741	4.22006
7SK	1.64627	0	0	0	0	0.4645
ADAMTS9	0	2.57813	2.40376	2.1276	3.07974	1.79476
BAIAP1	0	2.02465	1.51563	2.75928	2.50558	1.88199
SLC25A26	1.45092	5.90135	6.79924	6.74155	7.18127	10.7745
SNORA44	9.76952	0	0	0	0	0
KBTBD8	0.521985	0.234255	0.189627	0.2264	0.383525	0.318754
LRIG1	0.348124	17.6559	9.35731	8.97641	6.37157	5.7749
TAF13	7.91305	11.5259	6.78649	19.4072	17.5121	16.9178
FAM19A1	12.6304	377.607	0	0.0917027	0	0
FAM19A4	0.0439646	0	0.0951933	0.281576	0.392168	0.0958109
C3ORF64	0.446383	0.369222	2.2344	2.64819	3.59103	2.45192
TMF1	2.11772	2.56781	5.39162	460.848	56.563	6.5636
SUCLG2	8.31878	8.31907	7.49993	8.2795	9.37336	6.73434
UBE1C	61.3792	53.2313	0.0231233	54.5519	9.87311	55.0633
LMOD3	8.89367	11.3742	0.117701	9.34114	0.246524	0.034698
C1ORF106	0.0650523	0.0661456	0	0.0672411	0.138535	0.0865044
MITF	0	0	54.7845	0	1.37458	1.68637
ARL6IP5	2.19307	1.88829	8.24045	1.53577	4.20049	9.58572
MITF	16.2992	8.62833	18.0967	8.79787	0	0
CU468856.2	14.4644	10.1462	0	5.77041	0.0266549	0
CU468856.1	0	0.022559	0	0	39.5008	0.0236119
FOXP1	0.0221186	0	3.57248	0	0	2.99632
FOXP1	0	0	3.05853	0	2.84231	2.56575
PDHB	3.97	3.99812	0	3.62741	2.52113	0
PROK2	0	0	0	0	0	0
U6	0	0	2.7445	0	5.29127	4.06396
EIF4E3	5.11912	5.33716	657.619	4.53624	3.15192	2.5247
RYBP	2.45198	2.37572	2.34071	2.75077	1.71167	1.27934
SHQ1	1.08772	1.70428	1.39179	1.59765	0.0964427	0.367916
GXYLT2	2.62371	3.05558	2.365	3.46106	3.06118	0
PDZRN3	1.26368	2.40226	2.08707	0.25302	0.313611	2.98193
CNTN3	0.163924	0.378708	0.286344	0.212256	0	0
U6	0	0	0	0	0	0
U6	0	0	0	0	0	0
U6	0	0	0	0	0	0
U6	0	0	0	0	0	0
SNORA31	0	0	0	0	0	0
SNORA31	0	0	105.77	0	0	0
IL5RA	0.0840059	0.607535	0	0.176494	0	0
CNTN4	0.0440875	0.0896612	0	0.0569665	722.872	0.0442079
CHL1	1.39757	0.0673838	1.6541	8.19262	2.78226	3.74896
U6	0	11.8351	0	0	0	11.289
TRNT1	0.232105	3.68425	0.035357	0.0599351	0.060401	0
LRRN1	14.0134	4.16857	11.3031	13.2383	12.0254	8.3022
CRBN	6.57387	16.0972	4.42474	16.7866	5.05317	0
U2	17.3543	4.74e-09	12.5423	0	19.3648	2.37491
SUMF1	14.5243	3.41788	12.5956	4.61348	5.31343	4.55919
ARL8B	18.9399	30.4244	22.51	32.0404	18.9112	26.4887
BHLHE40	20.2794	0.65491	0.762496	0.738217	31.0606	19.5973
EDEM1	0.561859	1.66454	32.4534	1.23184	0.646187	0.59921
GRM7	0	0.166534	0	0	0	0
C3ORF32	0	0	0	0.012411	0	0
LMCD1	0	0	0	0	0	3.29514
OXTR	0	0	0	0	0	0
THUMPD3	4.10414	5.08907	3.33959	4.33008	4.32829	3.73215
LHFPL4	0.00442545	0.0134761	0.0117966	0	0.00403948	0
SETD5	2.72127	2.97099	2.59397	2.45772	2.57829	2.22323
TADA3	1.48619	4.92923	2.00795	1.99489	2.21277	5.40551
MTMR14	7.05415	2.32315	5.82179	6.46986	5.74178	0.479534
OGG1	0.25877	0.291033	0.275958	0.436753	0.531818	2.42806
CAMK1	3.8959	6.3499	0.0237893	5.13456	3.1011	3.22519
CPNE9	0.0223042	0.0682482	6.64187	0.0925199	0.0201568	0.0476206
BRPF1	0.798537	1.01296	0.717066	0.975119	1.15953	0.726221
TTLL3	69.4304	0.622134	56.3289	0.637881	0.686965	0.704469
ARPC4	0.884655	82.349	0.783094	77.6042	67.187	74.2724
RPUSD3	6.7943	7.87544	5.90427	9.62879	8.39838	7.63626
IL17RE	0.407404	0.23909	0.264963	0.256537	0.304055	0.202246
JAGN1	9.5867	19.2906	11.8645	15.6614	19.3871	12.5656
[truncated: 15,848 more rows]

## Sheet: S2
Table S2: Primers information for potential obese-specific biomarkers and housekeeping gene GAPDH.
GeneBank No	Gene name	Seuqence of Primer 5'→3'	Product size (bp)	Tm (℃）
XM_003356305	HDAC1	F: ACCTATGTTGATGCTGGGAG	124	54.6
		R: AAAGTAGTCGTTGTACGGAAG
NM_001105303.1	MDM2	ATCCTCCCCTTCCACCTCATTGT	146	59
		AGGGACATCAAAGCCCTCTTCTA
XM_003482185.4	MRPS10	AAGCAGTTCCAGGAGCAGTACGG	218	59.5
		CGGCAAAGTATTCATAACTGTCC
NM_001123192.1	RPL7L1	TCCTGGCGGCAACTACGTGACAG	194	62.3
		ACCTGCATAAAGACACCGCTGAA
NM_001206359.1	GAPDH	GGACTCATGACCACGGTCCAT	187	57.8
		TCAGATCCACAACCGACACGT

## Sheet: S3
Table S3: Total differentially expressed genes in the mature adipocytes of abdominal subcutaneous fat tissue from obese pigs compared with lean pigs
symbol	logFC	AveExpr	t	P.Value	adj.P.Val	B	State
RPL22	10.3199	5.16412	84.3036	6.05e-09	7.46e-05	8.38755	UP
C6ORF125	-10.6244	5.31851	-68.3338	1.69e-08	0.000104441	8.17799	DOWN
ITPR3	7.95871	6.6502	57.3355	4e-08	0.000164504	7.94007	UP
VAT1	8.60378	4.94137	52.6904	6.05e-08	0.000186617	7.80131	UP
NDUFB9	7.2924	4.2423	46.8697	1.07e-07	0.000249	7.57999	UP
KLHL31	5.92373	2.96705	45.7284	1.21e-07	0.000249	7.52884	UP
MFNG	6.11463	3.31191	43.9057	1.48e-07	0.000260444	7.44085	UP
SNRPD3	6.0064	3.01107	41.1482	2.03e-07	0.000313016	7.29111	UP
TOMM6	-8.05676	4.07354	-35.9172	3.95e-07	0.000541019	6.93848	DOWN
GTF2H5	-5.02192	2.54809	-33.7426	5.36e-07	0.000660735	6.75861	DOWN
SNORA68	6.96751	5.69453	32.7924	6.16e-07	0.00069064	6.67256	UP
IGF1R	-3.81365	2.02039	-31.9769	6.97e-07	0.000715967	6.59475	DOWN
C9ORF100	-9.13562	4.62158	-30.9391	8.19e-07	0.000776445	6.49004	DOWN
HPN	-4.53591	2.34551	-29.8401	9.77e-07	0.000804293	6.37166	DOWN
MTERF	-7.25708	5.29245	-29.8294	9.78e-07	0.000804293	6.37048	DOWN
CLVS1	-5.57594	2.79938	-28.6263	1.2e-06	0.000877764	6.23119	DOWN
TBC1D20	6.56313	3.40061	28.5229	1.22e-06	0.000877764	6.21873	UP
PKLR	-4.72905	2.36985	-28.2255	1.28e-06	0.000877764	6.1824	DOWN
HRC	-3.34613	1.71093	-27.4509	1.47e-06	0.00095248	6.08449	DOWN
TOM1L1	6.71731	5.56632	27.0519	1.58e-06	0.000971823	6.03213	UP
CDK16	-3.35544	1.9154	-25.3398	2.17e-06	0.00127298	5.79123	DOWN
HSD11B1L	-3.89495	2.21345	-24.332	2.64e-06	0.00147119	5.63606	DOWN
C11ORF67	5.06661	3.86461	24.143	2.74e-06	0.00147119	5.60577	UP
GLO1	8.4006	4.49697	23.9129	2.88e-06	0.00147719	5.56835	UP
PACSIN1	5.33347	2.76787	22.6349	3.76e-06	0.00184616	5.34936	UP
TRERF1	5.16169	2.67472	22.4455	3.91e-06	0.00184616	5.31522	UP
USP36	5.1031	2.92955	22.2958	4.04e-06	0.00184616	5.28791	UP
VAT1L	-3.50359	1.77363	-22.1115	4.21e-06	0.00185358	5.25388	DOWN
PEF1	3.86037	3.17795	21.5428	4.78e-06	0.00189222	5.14604	UP
SRI	4.36408	2.74956	21.4256	4.91e-06	0.00189222	5.12326	UP
HSPA5	6.61724	3.65093	21.3577	4.98e-06	0.00189222	5.10999	UP
FAM76B	4.25876	2.91693	21.2964	5.05e-06	0.00189222	5.09794	UP
RPL18A	3.66546	4.49772	21.2861	5.06e-06	0.00189222	5.0959	UP
ITGAX	3.85149	1.94075	20.6489	5.87e-06	0.00206755	4.96734	UP
DEGS2	-2.7936	1.4557	-20.4197	6.2e-06	0.00206755	4.91962	DOWN
LONP1	4.9634	2.7932	20.329	6.33e-06	0.00206755	4.90051	UP
SLC26A7	3.07244	1.84585	20.2642	6.43e-06	0.00206755	4.88679	UP
DSC3	5.21502	2.68093	20.2637	6.43e-06	0.00206755	4.88668	UP
SNORA52	7.02681	5.31442	20.1088	6.68e-06	0.00206755	4.8536	UP
CDK14	3.15197	1.85538	20.0897	6.71e-06	0.00206755	4.84948	UP
SRGAP3	-3.79127	3.21311	-19.8533	7.1e-06	0.00213632	4.79818	DOWN
FAM49B	4.2356	2.20644	19.7551	7.28e-06	0.00213632	4.77659	UP
FIBCD1	-3.15429	1.66973	-19.1138	8.54e-06	0.00244888	4.6317	DOWN
PGP	3.11782	1.55891	18.5179	9.96e-06	0.00270265	4.49059	UP
MBD3	2.94415	4.73095	18.5001	1e-05	0.00270265	4.48629	UP
CCND3	-2.35877	1.3213	-18.4701	1.01e-05	0.00270265	4.479	DOWN
ELN	-2.48914	1.40028	-18.3176	1.05e-05	0.0027439	4.4417	DOWN
UBE2Q1	4.37085	2.33392	18.2514	1.07e-05	0.0027439	4.42538	UP
LRRC66	4.44482	3.27121	18.0283	1.13e-05	0.00285291	4.36972	UP
PTMA	4.69367	3.52852	17.8492	1.19e-05	0.00293429	4.32435	UP
COL9A2	-3.15757	1.61518	-17.7108	1.24e-05	0.00298721	4.28886	DOWN
HOPX	6.15043	3.78978	17.0168	1.5e-05	0.0035548	4.10486	UP
ATXN7L2	4.51553	2.74255	16.6869	1.65e-05	0.00382838	4.01376	UP
SLC22A7	4.65787	2.82192	16.5575	1.71e-05	0.00382838	3.97735	UP
C22ORF23	-4.39969	2.81687	-16.5289	1.73e-05	0.00382838	3.96926	DOWN
CYTH1	-2.06026	1.0595	-16.4941	1.74e-05	0.00382838	3.95939	DOWN
VDAC3	2.43369	2.1391	16.4368	1.77e-05	0.00382838	3.94305	UP
PRR16	-5.39869	3.92787	-16.3833	1.8e-05	0.00382838	3.92773	DOWN
ARHGEF40	-4.28364	4.14453	-16.153	1.93e-05	0.00402968	3.86106	DOWN
SLC25A43	3.77204	3.62658	15.9848	2.03e-05	0.00410298	3.81154	UP
IMPAD1	6.34535	3.18204	15.982	2.03e-05	0.00410298	3.81073	UP
WIPI1	3.22779	1.62136	15.6111	2.27e-05	0.00451424	3.69907	UP
DARS	3.60127	3.83459	15.5642	2.31e-05	0.00451424	3.6847	UP
RECK	-4.08063	4.28054	-15.4155	2.42e-05	0.00462604	3.63878	DOWN
HDAC2	3.08543	1.64325	15.3853	2.44e-05	0.00462604	3.62939	UP
CLCC1	-3.08273	1.58383	-15.0628	2.7e-05	0.00498799	3.52754	DOWN
OTOP3	3.05169	1.53831	15.0516	2.71e-05	0.00498799	3.52395	UP
PRUNE2	5.3688	3.02875	14.9339	2.81e-05	0.00506798	3.48604	UP
SLA	7.73421	5.09681	14.9106	2.84e-05	0.00506798	3.47849	UP
CCDC97	-3.68354	2.66653	-14.6997	3.04e-05	0.00535018	3.40944	DOWN
ACAT1	3.49866	5.51316	14.6099	3.13e-05	0.00542302	3.37967	UP
CNN1	-4.95634	2.48424	-14.5478	3.19e-05	0.00542302	3.35896	DOWN
CHRNE	4.42903	2.61713	14.5311	3.21e-05	0.00542302	3.35336	UP
C7ORF63	-3.25615	2.28203	-14.2255	3.56e-05	0.00592532	3.24956	DOWN
ALCAM	-5.82803	3.52443	-13.8988	3.98e-05	0.00653638	3.13551	DOWN
MRPL21	2.35722	1.45396	13.8413	4.06e-05	0.00654157	3.11509	UP
RHOQ	-3.57735	2.84227	-13.8206	4.09e-05	0.00654157	3.10769	DOWN
HCCS	3.53253	1.90325	13.6532	4.33e-05	0.00684658	3.04752	UP
PRPF3	3.41233	3.96962	13.5974	4.42e-05	0.00686244	3.02727	UP
PABPC4	4.89056	2.47544	13.5747	4.45e-05	0.00686244	3.01903	UP
DSE	3.43687	1.76373	13.5364	4.51e-05	0.00687039	3.005	UP
TRIM14	-2.41949	1.22701	-13.2656	4.97e-05	0.00738729	2.9047	DOWN
HSD17B11	-2.04464	2.30419	-13.263	4.98e-05	0.00738729	2.90374	DOWN
ATP8B3	3.36619	1.69533	13.2322	5.03e-05	0.00738729	2.89218	UP
TMEM129	-2.02598	1.28126	-13.0586	5.36e-05	0.00777718	2.82635	DOWN
COPG	4.43757	2.68628	12.9972	5.48e-05	0.00786197	2.80284	UP
MADD	1.866	1.2283	12.8301	5.83e-05	0.00826812	2.73811	UP
PRSS35	3.71526	3.75374	12.7783	5.95e-05	0.00833375	2.71786	UP
SAMSN1	4.08447	2.35595	12.6074	6.34e-05	0.00873887	2.65031	UP
ASXL3	-1.61548	0.825573	-12.5927	6.38e-05	0.00873887	2.64445	DOWN
RGL2	2.72118	1.38103	12.3936	6.88e-05	0.00932659	2.56425	UP
PEX6	2.34314	2.6481	12.3334	7.05e-05	0.00944225	2.5397	UP
GRAMD2	4.59092	2.34436	12.2634	7.24e-05	0.00959773	2.51101	UP
PREP	2.4019	1.30578	12.2138	7.38e-05	0.00967679	2.49052	UP
NKAP	-2.24437	1.15056	-12.1879	7.46e-05	0.00967679	2.47981	DOWN
IRGC	-1.96872	0.991569	-12.0851	7.76e-05	0.00997068	2.437	DOWN
BET1	-2.63253	4.76231	-11.9062	8.34e-05	0.0105952	2.36143	DOWN
KDELR2	3.57154	2.44389	11.7779	8.78e-05	0.0109838	2.30645	UP
HMGA1	-2.0815	1.10738	-11.7464	8.89e-05	0.0109838	2.29286	DOWN
NTAN1	2.63382	2.7775	11.7411	8.91e-05	0.0109838	2.29058	UP
PPARD	7.39345	6.00858	11.6412	9.28e-05	0.0112714	2.24711	UP
FBXO6	2.07538	1.10474	11.629	9.32e-05	0.0112714	2.24181	UP
SESN3	1.76891	2.91248	11.5857	9.49e-05	0.0112726	2.22281	UP
PTK7	1.96983	1.01375	11.5814	9.51e-05	0.0112726	2.22092	UP
UBR7	-2.38247	3.81467	-11.322	0.000105891	0.0124076	2.10543	DOWN
CALD1	-5.75129	3.62055	-11.3046	0.000106667	0.0124076	2.09759	DOWN
GANAB	4.25895	5.70274	11.2327	0.000109949	0.0126573	2.06498	UP
KEAP1	3.43856	1.97912	11.213	0.000110866	0.0126573	2.05604	UP
QKI	-3.08315	4.69817	-11.1809	0.000112389	0.0126788	2.04135	DOWN
KPNA3	3.06886	2.95366	11.1658	0.000113111	0.0126788	2.03444	UP
DUSP3	2.63237	3.24115	11.1339	0.000114657	0.0127363	2.01981	UP
CDK15	-3.31515	1.84924	-10.9288	0.000125225	0.0136783	1.9246	DOWN
SERINC1	2.65848	2.84649	10.9264	0.000125357	0.0136783	1.92347	UP
CCL28	-6.37923	3.78476	-10.898	0.000126908	0.0137261	1.91016	DOWN
ZYG11B	-2.84906	1.44718	-10.7422	0.000135866	0.0143409	1.83625	DOWN
KLIP-1	-3.49212	2.10864	-10.7411	0.000135935	0.0143409	1.83571	DOWN
FAM83G	2.90839	1.47669	10.7386	0.000136081	0.0143409	1.83454	UP
GLT25D2	3.06471	3.6622	10.6216	0.000143322	0.0149759	1.77825	UP
IFT43	-1.94397	1.2292	-10.5663	0.000146903	0.0152211	1.75141	DOWN
STAT6	5.10354	2.88611	10.4348	0.000155864	0.0158826	1.68694	UP
OGFOD2	1.7125	1.92706	10.3074	0.000165164	0.0166924	1.6237	UP
RBP5	-2.79754	1.88644	-9.94646	0.000195382	0.0191888	1.43974	DOWN
WNT10B	4.47018	2.30797	9.93527	0.000196419	0.0191888	1.43392	UP
ANKRD2	1.70197	0.888335	9.89555	0.000200156	0.0191888	1.41323	UP
TTLL12	3.26224	1.7211	9.88998	0.000200688	0.0191888	1.41031	UP
HDAC1	2.39006	1.21391	9.71092	0.000218686	0.0207415	1.31584	UP
TMEM80	2.08906	1.049	9.67135	0.000222919	0.0209114	1.29471	UP
EGLN2	2.92723	2.08363	9.64734	0.000225535	0.0209114	1.28185	UP
TATDN1	2.50714	2.04777	9.64708	0.000225565	0.0209114	1.28171	UP
MNS1	2.44358	1.25419	9.61099	0.000229567	0.0211236	1.26232	UP
DAB1	2.0149	1.27009	9.50147	0.000242246	0.0219706	1.20298	UP
BUD13	2.53888	1.34388	9.50072	0.000242336	0.0219706	1.20257	UP
TRPV1	-9.84235	6.0606	-9.45128	0.000248335	0.0222942	1.17555	DOWN
INPP5A	3.00003	1.61044	9.43007	0.000250963	0.0222942	1.16391	UP
UROD	1.98108	3.53261	9.42713	0.00025133	0.0222942	1.1623	UP
PGD	-1.73829	0.929871	-9.37858	0.000257482	0.0226768	1.13555	DOWN
BCAT2	2.72094	2.08023	9.32171	0.000264919	0.0231663	1.10403	UP
ICA	1.76563	1.5804	9.26216	0.000272983	0.0236954	1.07082	UP
PTCHD4	3.47774	2.45643	9.24894	0.000274813	0.0236954	1.06342	UP
CH242-78C24.3	2.24386	1.32306	9.20885	0.000280453	0.0239652	1.0409	UP
FAM83A	-4.18213	2.15386	-9.19921	0.000281829	0.0239652	1.03547	DOWN
CNPY3	-1.55138	1.74831	-9.13107	0.000291792	0.0246424	0.996926	DOWN
MIF	2.29795	1.92758	9.10908	0.000295096	0.0247519	0.984427	UP
MT2A	4.25992	3.85228	8.96467	0.000317945	0.0264883	0.901551	UP
HSF4	2.48362	2.20251	8.9146	0.000326355	0.0270064	0.872505	UP
GALNT7	-1.50103	0.80031	-8.81102	0.000344613	0.0278819	0.811882	DOWN
GPR61	2.17556	1.19124	8.80135	0.000346379	0.0278819	0.806187	UP
RHAG	4.5953	2.30415	8.80024	0.000346583	0.0278819	0.805531	UP
ECHDC1	2.69799	1.90854	8.79364	0.000347795	0.0278819	0.801638	UP
CCNT1	1.53201	0.808443	8.79122	0.000348241	0.0278819	0.80021	UP
ADAMTS20	-1.56887	2.05712	-8.71416	0.0003628	0.0288602	0.754539	DOWN
ST8SIA4	2.69929	1.5587	8.7012	0.000365319	0.0288743	0.746817	UP
B4GALT7	5.25723	3.59808	8.61833	0.000381931	0.0299949	0.697177	UP
MET	4.29413	4.51466	8.5903	0.000387752	0.0302594	0.680279	UP
COCH	3.25479	1.85864	8.5342	0.000399724	0.0308037	0.646294	UP
MEGF8	1.59554	1.42869	8.52164	0.000402464	0.0308222	0.638655	UP
C6ORF170	-2.34091	3.24846	-8.46697	0.000414657	0.03156	0.605271	DOWN
ARL6IP4	-1.56981	2.04713	-8.38664	0.000433381	0.0327828	0.555835	DOWN
SNORA65	-2.20303	8.46904	-8.35121	0.000441959	0.0332278	0.533881	DOWN
ATP8A2	1.59192	0.854465	8.21225	0.000477616	0.0353204	0.44689	UP
RBCK1	2.58351	1.83671	8.20939	0.000478386	0.0353204	0.445084	UP
PUS10	-2.72425	1.79007	-8.13034	0.000500241	0.0367141	0.394939	DOWN
TMEM116	2.25459	1.31669	8.09621	0.000510042	0.037212	0.373145	UP
MIOS	2.03076	1.47217	8.04944	0.00052385	0.0379946	0.343129	UP
LRRC73	2.04242	1.06649	7.9691	0.000548623	0.0395586	0.291176	UP
VEGF	-9.7191	7.4745	-7.94123	0.00055754	0.0399679	0.273036	DOWN
PYGO1	1.75243	1.40186	7.78876	0.000609493	0.0434396	0.172714	UP
LYST	1.68727	3.50447	7.76817	0.000616943	0.0437179	0.159021	UP
CD3D	1.90849	1.065	7.74833	0.000624226	0.0439812	0.145793	UP
BYSL	1.93139	1.97111	7.61917	0.000674205	0.0472326	0.0589099	UP
SRP9	2.72893	3.1465	7.57809	0.000691093	0.0481422	0.0309795	UP
ORC1	2.50619	1.26863	7.56295	0.000697441	0.0482542	0.0206539	UP
MC5R	5.25003	2.65964	7.54231	0.000706208	0.0482542	0.00654543	UP
DYNLT3	3.63353	1.83871	7.52617	0.000713158	0.0482542	-0.00451728	UP
NUP43	-3.99332	3.91468	-7.5192	0.000716182	0.0482542	-0.00929622	DOWN
ZNF76	3.17954	2.403	7.47637	0.000735115	0.0492607	-0.0387801	UP
ULK2	-1.75455	1.22482	-7.41865	0.000761575	0.0507579	-0.0787554	DOWN
SMN1	3.77126	6.16793	7.39809	0.000771275	0.051128	-0.0930682	UP
FBXO21	2.06018	3.67382	7.35339	0.000792869	0.0521141	-0.124305	UP
HERC5	-2.24011	1.25297	-7.33534	0.000801794	0.0521141	-0.136969	DOWN
MRPS10	-2.0789	3.55048	-7.33281	0.000803055	0.0521141	-0.138748	DOWN
HNRNPAB	1.87788	3.6861	7.28753	0.000826014	0.0533233	-0.170652	UP
LRBA	-1.6216	1.90487	-7.20935	0.000867521	0.054854	-0.226171	DOWN
TIMP-2	2.2757	1.38592	7.11004	0.000923877	0.0575323	-0.297496	UP
DERL3	-4.7156	2.43265	-7.05443	0.000957332	0.0593161	-0.337831	DOWN
ART3	-1.81534	1.20595	-7.02863	0.000973336	0.0600062	-0.356636	DOWN
C3ORF23	1.64595	1.77698	7.01149	0.000984147	0.0603708	-0.369167	UP
HAT1	-2.77065	1.91356	-6.99814	0.00099267	0.0605449	-0.37895	DOWN
DSCR3	-2.29376	3.18118	-6.9917	0.000996805	0.0605449	-0.383667	DOWN
ATP2C1	2.26594	3.71129	6.95331	0.00102192	0.0615214	-0.411911	UP
CD2AP	-2.1926	2.52316	-6.93689	0.00103289	0.0615214	-0.42403	DOWN
KIFC1	-2.62398	1.34134	-6.93074	0.00103704	0.0615214	-0.428576	DOWN
P4HA	2.62221	4.08284	6.92772	0.00103908	0.0615214	-0.43081	UP
HDC	1.81726	2.89278	6.92077	0.0010438	0.0615214	-0.435951	UP
KBTBD3	2.08143	2.91279	6.91897	0.00104503	0.0615214	-0.437289	UP
MTA2	3.30146	3.75836	6.91489	0.00104781	0.0615214	-0.440307	UP
PUM2	-2.04641	5.2134	-6.90473	0.00105478	0.0616373	-0.447838	DOWN
FBXO44	1.99812	1.89597	6.85741	0.00108801	0.0632791	-0.483061	UP
KDM4A	1.70482	2.26739	6.80632	0.00112528	0.0651397	-0.521328	UP
HMMR	-1.80504	1.40987	-6.7771	0.00114729	0.066103	-0.543331	DOWN
CD164	2.40415	6.67331	6.76252	0.00115846	0.0663271	-0.554341	UP
CCNI	2.55315	1.33972	6.75801	0.00116193	0.0663271	-0.557749	UP
SNORD94	-8.15751	5.58948	-6.67454	0.00122865	0.069492	-0.621222	DOWN
SORBS1	3.78217	3.69529	6.61551	0.00127858	0.0719856	-0.666528	UP
P2X1R	-4.75382	3.1744	-6.53402	0.00135151	0.0743931	-0.72965	DOWN
ROBO1	-1.93088	1.29396	-6.48688	0.00139595	0.0764979	-0.76648	DOWN
DCUN1D2	-2.01793	1.71967	-6.42685	0.00145506	0.0786884	-0.813712	DOWN
DNMT3A2	2.24646	1.6784	6.36007	0.00152435	0.0817185	-0.866702	UP
R3HDML	3.9027	2.4054	6.31524	0.00157307	0.0833201	-0.902548	UP
CREG1	2.38534	7.07561	6.31394	0.0015745	0.0833201	-0.903584	UP
IFI27L2	1.74549	5.95655	6.3023	0.00158747	0.0834893	-0.912932	UP
RBMX2	-2.01686	2.43992	-6.29893	0.00159124	0.0834893	-0.915636	DOWN
HADH	5.64324	2.95844	6.28189	0.0016105	0.0841417	-0.929348	UP
TECPR2	1.5892	1.08473	6.26492	0.00162995	0.0847985	-0.94303	UP
EXOSC7	2.25711	3.26017	6.20625	0.00169937	0.0868266	-0.99058	UP
KPNB1	1.80827	4.10545	6.20233	0.00170414	0.0868266	-0.993776	UP
NDUFB11	3.92415	1.96702	6.13872	0.00178365	0.0905038	-1.04578	UP
MED10	3.35682	2.21211	6.02268	0.00194031	0.0972523	-1.14182	UP
TUT1	5.42078	4.83707	5.94991	0.00204687	0.101675	-1.20284	UP
C12ORF51	1.79043	1.90532	5.94349	0.00205659	0.101675	-1.20825	UP
ATG16L2	2.45175	2.24184	5.94024	0.00206154	0.101675	-1.21099	UP
FAM50A	6.39146	3.45931	5.87208	0.00216856	0.106104	-1.26876	UP
LEMD2	1.67031	2.15205	5.81057	0.0022708	0.109371	-1.32137	UP
ADAM15	1.68026	2.45478	5.80424	0.00228164	0.109466	-1.32681	UP
C6ORF108	1.53232	2.04013	5.79472	0.00229808	0.109827	-1.335	UP
HDLBP	-2.50336	2.89141	-5.77894	0.00232559	0.110713	-1.34859	DOWN
LRRIQ4	6.49095	3.40421	5.71205	0.00244669	0.115585	-1.40657	UP
SAA4	4.69972	2.51238	5.67903	0.00250918	0.118085	-1.43538	UP
GPR177	-1.90511	3.27044	-5.6635	0.00253923	0.118751	-1.44898	DOWN
LEP	-4.13695	2.13828	-5.64449	0.0025766	0.119544	-1.46566	DOWN
ST3GAL2	1.50327	1.55303	5.6433	0.00257896	0.119544	-1.46671	UP
UXT	3.04747	3.1151	5.62865	0.00260823	0.120447	-1.4796	UP
CA5B	-5.20146	3.61777	-5.56461	0.00274084	0.12563	-1.53626	DOWN
AQP7	1.5171	5.45761	5.544	0.0027852	0.126705	-1.55461	UP
LIMD1	-2.37637	2.03479	-5.48374	0.00291981	0.130657	-1.60854	DOWN
C2ORF44	-3.11378	2.20961	-5.454	0.00298908	0.131983	-1.63533	DOWN
VRK3	-1.56384	2.01923	-5.44607	0.00300788	0.131983	-1.64249	DOWN
UQCRFS1	2.92074	2.03127	5.43682	0.00302997	0.13248	-1.65086	UP
LRRC4	1.97171	6.48278	5.42711	0.00305337	0.133032	-1.65965	UP
LHPP	5.25351	3.65718	5.38204	0.00316479	0.137401	-1.70061	UP
RAB7A	2.98258	3.9772	5.32691	0.00330768	0.1426	-1.75107	UP
BCKDHA	6.20613	3.76535	5.30436	0.0033683	0.14454	-1.77183	UP
SLC7A9	1.92061	1.44474	5.30149	0.00337611	0.14454	-1.77447	UP
LPHN2	2.29717	1.22028	5.20918	0.00363899	0.15366	-1.86017	UP
PLCL2	3.86314	2.35909	5.16632	0.00376919	0.157539	-1.90034	UP
PROS	-1.98555	1.13558	-5.12513	0.00389947	0.161344	-1.93917	DOWN
DEDD	-2.70526	1.36575	-5.0993	0.0039839	0.163738	-1.96364	DOWN
IER2	-3.46387	3.14522	-5.07606	0.00406164	0.166008	-1.98573	DOWN
WBSCR27	2.68372	2.11016	5.05019	0.00415032	0.168889	-2.01041	UP
LY64	3.36137	1.7172	5.04349	0.00417367	0.169281	-2.01682	UP
VPS52	5.26153	2.64916	5.00487	0.00431122	0.172589	-2.05386	UP
PRICKLE2	1.76482	1.7236	4.99905	0.00433239	0.172875	-2.05946	UP
STEAP4	-3.17289	1.89844	-4.95026	0.00451489	0.177807	-2.1066	DOWN
PSMB1	3.4128	5.7924	4.8927	0.00474189	0.183585	-2.16264	UP
SCGB1C1	2.37737	1.57141	4.88811	0.00476055	0.183585	-2.16712	UP
RGS22	4.55292	6.01762	4.88484	0.00477392	0.183585	-2.17032	UP
MC2R	-1.91249	1.09171	-4.88353	0.00477928	0.183585	-2.17161	DOWN
CEP95	-2.65524	1.45311	-4.88348	0.00477947	0.183585	-2.17165	DOWN
SPACA5	3.29127	2.85453	4.87716	0.00480544	0.184009	-2.17784	UP
EIF3I	4.17101	2.11553	4.82627	0.00502065	0.191064	-2.22788	UP
CD47	3.62278	3.15968	4.80578	0.00511051	0.19329	-2.24813	UP
HACL1	1.69946	4.43227	4.77852	0.00523293	0.196714	-2.27516	UP
ARPC5	4.47619	4.17861	4.76815	0.00528039	0.197593	-2.28547	UP
MFSD2A	-4.83248	2.45699	-4.76114	0.00531276	0.197593	-2.29245	DOWN
CH242-151D17.4	-1.65896	0.853018	-4.75949	0.00532043	0.197593	-2.2941	DOWN
MARCKSL1	-2.85369	1.54258	-4.68311	0.0056893	0.208157	-2.37062	DOWN
MAP1LC3A	1.84075	3.19969	4.67757	0.00571715	0.208405	-2.37619	UP
MTHFD1	3.55154	2.36429	4.66512	0.00578045	0.209626	-2.38876	UP
MSN	2.51913	4.31039	4.62473	0.00599143	0.216007	-2.42966	UP
SPRED2	6.00872	4.30813	4.60334	0.00610679	0.219147	-2.45142	UP
TMEM93	3.71395	3.98279	4.52167	0.00657177	0.230854	-2.53513	UP
PPP3CB	1.52902	2.71514	4.49856	0.00671073	0.233822	-2.55899	UP
RG9MTD3	1.67513	0.86225	4.43051	0.00714027	0.246323	-2.62971	UP
GALNTL1	2.82305	3.74756	4.4056	0.00730541	0.25021	-2.65577	UP
OSBP	5.97315	4.02472	4.37994	0.00748025	0.252689	-2.68271	UP
NEBL	1.78894	1.498	4.35291	0.0076697	0.256069	-2.7112	UP
FAM174B	1.584	1.35703	4.35088	0.00768414	0.256069	-2.71335	UP
C15ORF52	2.38297	1.59309	4.33401	0.00780547	0.259411	-2.73119	UP
RPL31	6.22223	3.783	4.32762	0.00785198	0.259557	-2.73796	UP
AMD1	-2.92781	2.58875	-4.30534	0.00801675	0.26289	-2.7616	DOWN
RAB22A	2.37303	1.74839	4.28363	0.00818125	0.267573	-2.78473	UP
ssc-mir-126	2.60281	1.79824	4.27735	0.00822953	0.268122	-2.79143	UP
CPOX	1.84451	2.80072	4.2758	0.00824153	0.268122	-2.79308	UP
CEP89	-4.60813	2.37273	-4.22104	0.00867771	0.277912	-2.85177	DOWN
TNFAIP8L2	1.55373	0.837616	4.18192	0.00900578	0.284638	-2.89398	UP
FBXW5	3.3451	3.09159	4.17418	0.00907239	0.284638	-2.90236	UP
CH242-363D24.1	-6.23975	4.80834	-4.16312	0.00916852	0.28605	-2.91435	DOWN
LOX	2.00984	1.15327	4.14238	0.00935203	0.290455	-2.93688	UP
IKZF5	-2.25971	3.41665	-4.13095	0.00945498	0.292071	-2.94933	DOWN
RCHY1	-1.75769	1.92487	-4.11219	0.00962682	0.292536	-2.9698	DOWN
UBN1	2.20814	1.84889	4.10303	0.00971208	0.294052	-2.97982	UP
TDRD10	-3.48242	1.92404	-4.08904	0.00984392	0.296038	-2.99514	DOWN
PRR2	3.24645	3.27437	4.082	0.00991103	0.297331	-3.00286	UP
PPM1J	4.28785	3.16605	4.07216	0.0100057	0.297569	-3.01366	UP
SORT1	3.9053	3.88933	4.07115	0.0100155	0.297569	-3.01477	UP
RPL19	6.45221	4.41462	4.00874	0.0106419	0.310161	-3.08365	UP
CHL1	1.77932	1.76759	4.00501	0.0106808	0.310161	-3.08779	UP
CH242-272B23.4	3.59006	1.9156	3.99773	0.0107571	0.310161	-3.09588	UP
ABHD12	2.92973	4.16674	3.99727	0.0107619	0.310161	-3.09639	UP
PALLD	1.78503	1.33101	3.99685	0.0107663	0.310161	-3.09685	UP
BLVRA	2.16619	3.2946	3.97671	0.010981	0.314142	-3.11925	UP
DCAKD	1.62326	2.06421	3.96347	0.0111247	0.316493	-3.134	UP
RPS17	-2.584	1.49388	-3.95253	0.0112451	0.318706	-3.14622	DOWN
SULF1	1.94858	2.13816	3.92805	0.0115201	0.322541	-3.17361	UP
TGH	5.04954	3.56194	3.91618	0.0116563	0.32297	-3.18694	UP
CNP	1.86237	3.42212	3.90135	0.0118289	0.324747	-3.20361	UP
KDM6B	-1.59782	1.07968	-3.89548	0.011898	0.324747	-3.21021	DOWN
ABL1	2.58631	1.76624	3.84517	0.0125104	0.336797	-3.26707	UP
PLEKHA2	5.57915	5.24381	3.8331	0.0126626	0.338594	-3.28076	UP
DLC1	-1.73069	1.35688	-3.82918	0.0127125	0.338594	-3.28522	DOWN
DDX54	-1.50832	1.15465	-3.79997	0.0130916	0.345332	-3.31849	DOWN
GPR98	-2.45271	1.97613	-3.78311	0.0133163	0.347952	-3.33774	DOWN
SNORD83	-10.7188	5.86453	-3.78285	0.0133198	0.347952	-3.33804	DOWN
JUP	1.69554	3.00651	3.75722	0.01367	0.354099	-3.3674	UP
CACNG4	2.0092	1.56871	3.73832	0.0139352	0.354889	-3.38913	UP
RCOR1	3.32278	2.48351	3.73827	0.0139358	0.354889	-3.38918	UP
PARP14	1.78599	1.38057	3.7366	0.0139595	0.354889	-3.3911	UP
CU302278.9	3.7911	2.9436	3.70614	0.0144002	0.363727	-3.42623	UP
ZNF330	-2.39772	1.22579	-3.70444	0.0144252	0.363727	-3.42819	DOWN
CRLF3	4.22627	3.35437	3.68709	0.0146838	0.367207	-3.44827	UP
ZNF238	1.66239	1.2784	3.68544	0.0147086	0.367207	-3.45018	UP
SNORA23	6.63688	4.61343	3.68521	0.0147121	0.367207	-3.45044	UP
FAM102B	2.70697	2.0731	3.66544	0.0150141	0.373026	-3.47339	UP
SNORA55	-2.98688	1.51126	-3.6595	0.0151061	0.373026	-3.48029	DOWN
RRP15	2.87602	3.80595	3.65644	0.0151539	0.373026	-3.48386	UP
CLIC6	5.18865	4.15463	3.65237	0.0152175	0.373026	-3.48859	UP
RPAP1	2.47852	1.25636	3.64773	0.0152905	0.373723	-3.49399	UP
SDCBP2	2.18019	1.48182	3.64141	0.0153906	0.373723	-3.50135	UP
TSPAN17	1.5713	1.71224	3.63963	0.015419	0.373723	-3.50343	UP
FGF7	2.34853	4.80775	3.62585	0.0156402	0.375182	-3.51951	UP
GEMIN8	1.89356	1.65348	3.62133	0.0157136	0.37574	-3.52479	UP
WSB2	2.18501	1.71954	3.60553	0.0159731	0.379476	-3.54327	UP
KLHDC3	-2.95605	1.49451	-3.58978	0.0162367	0.384258	-3.56173	DOWN
IMPA1	1.92166	1.82949	3.57526	0.0164842	0.387003	-3.57879	UP
NPM1	5.63159	4.56247	3.55651	0.0168103	0.388616	-3.60087	UP
EDG1	1.59931	1.21839	3.55553	0.0168274	0.388616	-3.60202	UP
ABCD1	3.34998	2.47725	3.55327	0.0168674	0.388616	-3.60469	UP
SNORD116	2.99275	13.1947	3.55178	0.0168936	0.388616	-3.60644	UP
GRIK5	1.69307	1.61858	3.53838	0.0171325	0.391918	-3.62226	UP
TRAPPC4	2.49411	2.85711	3.52288	0.0174136	0.393419	-3.64059	UP
IER3IP1	1.87541	3.77967	3.51991	0.0174681	0.393419	-3.6441	UP
TEX2	2.18738	2.6456	3.51867	0.0174908	0.393419	-3.64557	UP
BRPF3	1.93302	2.33932	3.51771	0.0175086	0.393419	-3.64672	UP
CDC42	5.90056	3.03641	3.50543	0.0177365	0.397621	-3.66127	UP
FZD5	1.83589	1.58248	3.47913	0.0182361	0.402958	-3.69253	UP
SMPDL3A	2.29898	5.66816	3.47278	0.018359	0.404225	-3.70009	UP
ENTPD7	1.72502	2.43712	3.46566	0.0184981	0.404934	-3.70858	UP
CLK1	-6.63563	5.02908	-3.46441	0.0185225	0.404934	-3.71006	DOWN
PRPSAP1	2.35494	2.05848	3.4463	0.0188822	0.410173	-3.73169	UP
TFIP11	2.02698	2.01912	3.44095	0.01899	0.410173	-3.73809	UP
ARHGAP22	2.02433	1.52983	3.43138	0.0191846	0.410173	-3.74955	UP
USP37	3.53737	2.67022	3.42875	0.0192383	0.410173	-3.75269	UP
MSX1	-2.44335	1.25032	-3.42801	0.0192535	0.410173	-3.75358	DOWN
SMARCA4	1.95702	2.19779	3.42777	0.0192585	0.410173	-3.75387	UP
SLC6A6	1.61239	1.53039	3.41385	0.0195469	0.410173	-3.77057	UP
SOCS5	-1.76008	1.42963	-3.41061	0.0196146	0.410173	-3.77445	DOWN
RPL7L1	-2.10594	1.7158	-3.4037	0.0197602	0.410173	-3.78275	DOWN
ALKBH6	2.30794	2.08896	3.39285	0.0199912	0.411501	-3.79581	UP
DYRK1A	3.21825	1.87547	3.379	0.0202903	0.411501	-3.81248	UP
CORO2A	-2.55929	1.28912	-3.37529	0.0203714	0.411661	-3.81696	DOWN
TOB1	2.46894	2.6694	3.33472	0.0212819	0.420679	-3.86601	UP
FGFR3	2.10773	1.08992	3.32448	0.0215191	0.420679	-3.87843	UP
CAP1	3.48352	3.59718	3.32377	0.0215357	0.420679	-3.87929	UP
VDAC5P	2.00269	4.6434	3.32107	0.0215987	0.420679	-3.88257	UP
RBM39	2.49302	3.51607	3.31969	0.021631	0.420679	-3.88424	UP
TCEAL8	2.93175	2.96679	3.31193	0.0218138	0.421369	-3.89367	UP
SDR16C5	1.80976	7.89301	3.31122	0.0218306	0.421369	-3.89453	UP
SBF2	2.17386	2.45894	3.31052	0.0218472	0.421369	-3.89539	UP
FAM129A	-1.91697	1.31307	-3.30638	0.0219457	0.42148	-3.90043	DOWN
ABCB6	2.47005	2.81465	3.28259	0.0225207	0.424038	-3.9294	UP
NCOA7	2.65332	2.74887	3.28192	0.0225372	0.424038	-3.93021	UP
RNF4	1.75636	1.57582	3.28181	0.0225399	0.424038	-3.93035	UP
AIFM2	3.334	4.2351	3.28038	0.0225749	0.424038	-3.93209	UP
HMGB2	-2.53026	1.91064	-3.27963	0.0225935	0.424038	-3.93301	DOWN
MAB21L2	1.6194	0.950171	3.27324	0.0227515	0.424396	-3.94081	UP
RRM2B	3.02884	2.45243	3.26769	0.0228897	0.424425	-3.94759	UP
MTERFD1	2.7011	2.23798	3.26731	0.0228992	0.424425	-3.94805	UP
RINT1	1.56633	1.71625	3.25763	0.0231426	0.427168	-3.95988	UP
GRAMD3	-1.8503	1.55193	-3.25528	0.0232022	0.427628	-3.96276	DOWN
IRF9	1.7734	2.8307	3.24973	0.0233437	0.428555	-3.96956	UP
BANF1	4.99942	4.0612	3.24129	0.0235603	0.430171	-3.97989	UP
PTMS	2.89952	4.58629	3.23303	0.0237748	0.43211	-3.99003	UP
PSMD4	-2.99079	2.45874	-3.22827	0.0238995	0.43211	-3.99587	DOWN
ZNF451	2.27741	1.82098	3.2029	0.0245757	0.437044	-4.02705	UP
PON1	1.77132	3.85726	3.20022	0.0246485	0.437044	-4.03036	UP
NARS	3.80744	3.00455	3.19474	0.024798	0.437044	-4.03711	UP
CHST12	1.89346	1.26304	3.19135	0.0248908	0.437044	-4.04128	UP
MRAS	1.5764	4.6144	3.18881	0.0249609	0.437044	-4.04442	UP
TMEM234	1.85387	1.02884	3.18845	0.0249708	0.437044	-4.04487	UP
HSPB1	1.70124	6.15923	3.18645	0.025026	0.437044	-4.04733	UP
LAMP2	2.97649	2.69005	3.18566	0.0250478	0.437044	-4.0483	UP
TPRA1	2.04173	1.67629	3.17647	0.0253036	0.437044	-4.05965	UP
PTN	1.71676	2.24619	3.17557	0.0253289	0.437044	-4.06076	UP
ITGB8	2.49796	2.05347	3.17519	0.0253395	0.437044	-4.06123	UP
FOXE1	-2.31801	1.83812	-3.17358	0.0253847	0.437044	-4.06322	DOWN
FBXL8	2.94291	1.90867	3.16912	0.0255103	0.437471	-4.06873	UP
MORC3	1.75155	1.49826	3.14718	0.0261388	0.445081	-4.09588	UP
EPS15L1	1.7683	1.4535	3.14609	0.0261706	0.445081	-4.09724	UP
MLLT1	1.65635	1.35236	3.13491	0.0264979	0.448305	-4.1111	UP
C5ORF22	2.91313	2.03921	3.13056	0.0266265	0.448305	-4.11649	UP
C6ORF141	-1.61038	1.3579	-3.12926	0.0266653	0.448305	-4.11811	DOWN
ARPP19	2.86075	2.29372	3.12646	0.0267486	0.448375	-4.12159	UP
CCDC85B	-4.36734	4.69335	-3.12077	0.0269188	0.448829	-4.12866	DOWN
NADSYN1	3.62177	2.34273	3.12016	0.026937	0.448829	-4.12941	UP
KCTD5	1.68474	0.859563	3.10158	0.0275019	0.452125	-4.15253	UP
IQCJ-SCHIP1	2.1969	1.66882	3.09703	0.0276422	0.452125	-4.1582	UP
NOMO1	2.77424	2.50561	3.09341	0.0277545	0.452125	-4.16271	UP
GAS2L1	1.93282	2.30998	3.09074	0.0278377	0.452125	-4.16604	UP
SEC61A2	1.96231	1.65729	3.09	0.0278607	0.452125	-4.16696	UP
SEMA3C	1.74451	4.77876	3.08722	0.0279477	0.452125	-4.17043	UP
CTC1	-4.8528	4.59077	-3.08369	0.0280585	0.452125	-4.17484	DOWN
SERPINB5	2.31828	1.79213	3.0811	0.0281399	0.452125	-4.17806	UP
C10ORF26	3.31273	3.24473	3.0793	0.0281971	0.452125	-4.18032	UP
C4ORF17	-3.10166	1.59913	-3.07649	0.0282859	0.452125	-4.18382	DOWN
SVIL	1.8235	2.52967	3.07592	0.0283041	0.452125	-4.18453	UP
NANS	5.49206	2.9999	3.06478	0.0286605	0.455183	-4.19845	UP
C2ORF68	1.84335	3.5642	3.06065	0.0287939	0.455183	-4.20362	UP
FRMPD1	-2.90659	1.55337	-3.05902	0.0288467	0.455183	-4.20566	DOWN
ENTPD8	2.85179	2.20184	3.04858	0.0291879	0.455183	-4.21873	UP
GAS6	2.82001	2.33449	3.04806	0.0292049	0.455183	-4.21938	UP
TTLL5	1.9039	1.92073	3.04598	0.0292736	0.455183	-4.22199	UP
SLC35B2	-3.58531	2.54538	-3.03498	0.029639	0.456241	-4.23577	DOWN
PIM2	-2.30533	2.27913	-3.03243	0.0297244	0.456985	-4.23897	DOWN
H3F3A	3.21775	3.71826	3.02759	0.0298874	0.45728	-4.24504	UP
APOO	2.47455	2.14828	3.02649	0.0299247	0.45728	-4.24643	UP
LSM1	-1.91181	2.135	-3.02554	0.0299567	0.45728	-4.24762	DOWN
NDUFV1	1.95201	5.40633	3.02467	0.0299864	0.45728	-4.24872	UP
PRSS23	2.55097	4.27587	3.0223	0.0300669	0.45728	-4.2517	UP
B3GAT3	2.01792	2.68005	3.01326	0.0303761	0.45742	-4.26306	UP
HBS1L	3.58425	3.2313	3.00822	0.03055	0.45742	-4.26939	UP
SERPINH1	9.21495	7.6236	3.00591	0.0306299	0.45742	-4.27229	UP
LUM	2.54103	2.59838	2.99975	0.0308447	0.457675	-4.28005	UP
SNRPC	-2.11888	3.97915	-2.99885	0.0308762	0.457675	-4.28118	DOWN
GATC	2.63748	3.825	2.99348	0.031065	0.457675	-4.28795	UP
TMEM201	-7.24794	3.84477	-2.99265	0.0310944	0.457675	-4.289	DOWN
RNF125	2.02574	1.74449	2.99149	0.0311354	0.457675	-4.29046	UP
DCUN1D4	-4.69882	4.16149	-2.99063	0.0311656	0.457675	-4.29154	DOWN
UBXN1	2.89007	4.41958	2.98586	0.0313351	0.458813	-4.29755	UP
DERL1	3.68174	4.03276	2.98121	0.0315014	0.45966	-4.30342	UP
TSFM	2.32752	2.43047	2.97759	0.0316311	0.460666	-4.30798	UP
METTL13	-2.14786	1.65113	-2.97523	0.0317163	0.460666	-4.31096	DOWN
RNase_MRP	8.47767	5.82023	2.96719	0.0320082	0.46319	-4.32111	UP
COMMD7	-3.91475	2.63062	-2.95605	0.0324176	0.465992	-4.3352	DOWN
ACADSB	2.16548	1.83796	2.95495	0.0324583	0.465992	-4.33659	UP
2022-03-04	1.81489	1.55494	2.95263	0.0325442	0.466593	-4.33952	UP
HLTF	2.34854	2.26427	2.94139	0.032965	0.467946	-4.35375	UP
MRPS5	2.40226	1.5935	2.9379	0.0330969	0.467946	-4.35817	UP
PHLPP2	2.6342	1.49626	2.93697	0.033132	0.467946	-4.35934	UP
PROM1	-2.62432	2.07359	-2.93372	0.0332556	0.468329	-4.36346	DOWN
SNORD2	-4.71562	6.31792	-2.93104	0.0333578	0.468987	-4.36686	DOWN
IRGQ	1.57268	1.47141	2.92859	0.0334516	0.469746	-4.36997	UP
DUSP4	2.63689	2.86481	2.92544	0.0335724	0.469746	-4.37396	UP
ZNHIT3	3.68693	3.06785	2.92435	0.0336144	0.469746	-4.37534	UP
SIAE	2.89658	3.12053	2.92171	0.0337166	0.469746	-4.3787	UP
RAB11FIP4	1.89179	1.61158	2.91183	0.034101	0.472373	-4.39124	UP
GNL1	1.63622	1.04333	2.90357	0.0344261	0.472373	-4.40173	UP
FBXO11	1.72196	1.55557	2.90333	0.0344357	0.472373	-4.40204	UP
FLJ22638	1.55122	1.85384	2.9017	0.0345003	0.472373	-4.40411	UP
C1ORF194	4.43844	2.6494	2.89217	0.0348807	0.475226	-4.41623	UP
RNF128	3.02134	2.65805	2.88311	0.0352467	0.478625	-4.42777	UP
CUL7	2.04939	2.41435	2.87751	0.035475	0.478642	-4.4349	UP
BCKDHB	3.50574	3.80915	2.87727	0.035485	0.478642	-4.43521	UP
C1ORF174	2.15828	1.62161	2.87648	0.035517	0.478642	-4.43621	UP
NDUFB2	3.29956	3.88781	2.87166	0.0357155	0.478642	-4.44236	UP
FGD2	-3.65361	1.88662	-2.87091	0.0357461	0.478642	-4.44331	DOWN
KLC4	2.07786	2.77841	2.86985	0.0357901	0.478642	-4.44466	UP
NF2	2.21269	2.64299	2.86699	0.0359083	0.478642	-4.4483	UP
PHF15	1.73709	2.25068	2.86598	0.0359503	0.478642	-4.44959	UP
APOA1BP	3.52602	2.73892	2.86592	0.0359529	0.478642	-4.44967	UP
DDAH1	2.02327	2.23889	2.86405	0.0360307	0.478642	-4.45206	UP
ANGPTL4	-1.91494	5.28397	-2.86192	0.0361195	0.478642	-4.45478	DOWN
SCARNA2	2.93689	6.38514	2.85906	0.0362392	0.478955	-4.45843	UP
DUSP5	-1.54376	1.90542	-2.85817	0.0362767	0.478955	-4.45957	DOWN
CDK3	2.36608	1.73231	2.8565	0.0363469	0.478955	-4.4617	UP
MDM2	1.68448	2.60817	2.85333	0.0364804	0.478955	-4.46575	UP
SEPW1	3.19546	5.04786	2.84694	0.0367512	0.479347	-4.47391	UP
TSC2	1.63665	1.83334	2.84265	0.0369342	0.479857	-4.47939	UP
KLHL28	2.66296	2.89253	2.83663	0.037193	0.480219	-4.48709	UP
MON2	1.78281	1.55127	2.82889	0.0375286	0.482007	-4.49699	UP
STUB1	2.87836	2.18528	2.82202	0.0378293	0.483503	-4.50579	UP
HMBOX1	2.97835	3.93251	2.81986	0.0379246	0.484069	-4.50856	UP
BHMT	1.69685	1.30158	2.81695	0.0380532	0.484193	-4.51229	UP
ERI3	1.87151	2.15815	2.8148	0.0381482	0.484193	-4.51503	UP
SUPT16H	2.44644	2.634	2.81388	0.0381894	0.484193	-4.51622	UP
KIAA1841	1.84666	2.01208	2.80673	0.0385085	0.484193	-4.52539	UP
PPP4R2	2.46772	2.82104	2.80458	0.038605	0.484193	-4.52814	UP
MTCP1NB	-4.58928	3.7445	-2.79638	0.0389758	0.484193	-4.53867	DOWN
PPL	2.48864	1.48926	2.79418	0.0390761	0.484193	-4.54149	UP
PAQR3	2.3479	3.46626	2.78741	0.0393861	0.484193	-4.55019	UP
CLEC2D	-2.43982	2.45687	-2.78713	0.0393988	0.484193	-4.55054	DOWN
SCMH1	1.81411	2.3694	2.78346	0.0395681	0.484193	-4.55526	UP
CHCHD1	1.86288	3.39857	2.78267	0.0396045	0.484193	-4.55627	UP
AVPI1	2.87367	2.55093	2.78195	0.0396378	0.484193	-4.5572	UP
RAB9A	1.61176	4.30674	2.78032	0.0397136	0.484193	-4.5593	UP
TTC36	4.52227	3.02512	2.77883	0.0397827	0.484193	-4.56121	UP
NAPA	2.48165	3.10963	2.77702	0.0398669	0.484193	-4.56353	UP
TNFRSF19	-2.55465	2.00492	-2.77134	0.0401327	0.484193	-4.57084	DOWN
NFKBIA	3.10711	3.00062	2.76988	0.0402015	0.484193	-4.57273	UP
RBBP8	5.21865	5.18537	2.76781	0.040299	0.484193	-4.57539	UP
TMF1	4.18625	4.0262	2.76639	0.0403661	0.484193	-4.57722	UP
PTPN11	2.53416	6.91205	2.76634	0.0403685	0.484193	-4.57728	UP
PRDX1	1.54256	7.96912	2.76536	0.0404147	0.484193	-4.57854	UP
SKA3	3.32717	2.09344	2.75317	0.0409962	0.486595	-4.59424	UP
AK2	1.61898	1.28595	2.75146	0.0410787	0.486595	-4.59644	UP
CMTM6	3.57403	3.1279	2.74545	0.0413693	0.486595	-4.60418	UP
CDC23	1.61652	1.99641	2.74023	0.0416235	0.486595	-4.61091	UP
ENOX1	-2.13577	1.07841	-2.72955	0.0421498	0.486595	-4.6247	DOWN
BCAS4	1.79122	1.63218	2.72822	0.0422155	0.486595	-4.62641	UP
COL1A2	-2.54139	4.66514	-2.72583	0.0423343	0.486595	-4.62949	DOWN
IFT27	1.66734	1.652	2.7258	0.0423361	0.486595	-4.62954	UP
CSNK1A1	3.26049	3.20106	2.71406	0.0429256	0.486595	-4.64471	UP
USP7	2.22886	1.99251	2.71272	0.0429935	0.486595	-4.64644	UP
C7H6ORF47	2.77114	1.41717	2.7127	0.0429941	0.486595	-4.64646	UP
CD3Z	2.69062	7.50853	2.70865	0.0432	0.486595	-4.65169	UP
PGCP	2.84177	3.07078	2.70839	0.0432134	0.486595	-4.65203	UP
SPTLC1	1.98696	1.00237	2.70366	0.0434551	0.488054	-4.65814	UP
C2ORF88	3.12695	2.79833	2.70307	0.0434854	0.488054	-4.65891	UP
SCARNA8	1.75825	1.81404	2.70155	0.0435638	0.488054	-4.66088	UP
CEP135	1.95652	3.93534	2.70025	0.0436305	0.488054	-4.66256	UP
DROSHA	4.81189	3.96329	2.70017	0.0436347	0.488054	-4.66267	UP
STOM	-2.56491	2.0747	-2.69357	0.043976	0.488054	-4.6712	DOWN
XPO7	2.65444	2.38794	2.69223	0.044046	0.488054	-4.67294	UP
UTP18	-1.89238	1.69059	-2.69164	0.0440765	0.488054	-4.6737	DOWN
APBB1	-6.00967	3.09924	-2.6888	0.0442251	0.488054	-4.67739	DOWN
SUV39H2	3.75685	2.75711	2.68876	0.0442272	0.488054	-4.67744	UP
CXCR7	1.76423	2.19552	2.68448	0.0444513	0.488054	-4.68297	UP
SLC26A4	3.50215	3.18535	2.68237	0.0445625	0.488394	-4.68571	UP
STK25	2.80108	2.40902	2.67703	0.0448452	0.488847	-4.69263	UP
MYOF	3.53934	2.5221	2.67265	0.0450786	0.488847	-4.69831	UP
KCTD14	2.05618	1.8235	2.66822	0.0453157	0.489429	-4.70405	UP
TALDO1	5.81487	3.66455	2.66047	0.0457343	0.489559	-4.71411	UP
CPT1A	-1.6233	0.932675	-2.65439	0.0460657	0.490111	-4.722	DOWN
SLC27A3	4.25284	4.42687	2.65326	0.0461275	0.490111	-4.72347	UP
C20ORF26	2.70763	1.50895	2.65138	0.0462307	0.490111	-4.72591	UP
PLS3	-3.90054	3.49389	-2.64951	0.0463337	0.490111	-4.72834	DOWN
TIMM23	3.94956	3.43809	2.64938	0.0463406	0.490111	-4.7285	UP
PTPN2	1.51758	2.26449	2.64877	0.0463743	0.490111	-4.7293	UP
ITSN2	2.27291	3.09923	2.64669	0.0464893	0.490111	-4.732	UP
APC1	2.00184	2.61473	2.64637	0.0465069	0.490111	-4.73242	UP
IDO1	-1.62754	1.47765	-2.64121	0.046793	0.490468	-4.73912	DOWN
STAT5B	2.44078	2.22272	2.63789	0.046978	0.490468	-4.74343	UP
TOMM7	4.32105	6.43416	2.63636	0.0470637	0.490468	-4.74542	UP
YPEL5	4.482	4.09521	2.63579	0.0470957	0.490468	-4.74616	UP
RPL35	4.09311	3.90904	2.6354	0.0471176	0.490468	-4.74667	UP
ELOVL4	-2.36298	2.34436	-2.63517	0.0471303	0.490468	-4.74696	DOWN
TIMP1	-3.82452	4.10734	-2.63395	0.0471991	0.490468	-4.74856	DOWN
ADORA1	-2.12241	1.6815	-2.62872	0.0474943	0.490468	-4.75536	DOWN
ssc-mir-345-2	2.5772	1.32628	2.62821	0.0475226	0.490468	-4.75601	UP
LEO1	2.75605	2.21387	2.62729	0.047575	0.490468	-4.75721	UP
P2RX4	3.10581	2.24788	2.62611	0.0476417	0.490745	-4.75874	UP
IMMT	-1.74616	1.21609	-2.61684	0.0481713	0.492395	-4.77081	DOWN
DPP4	3.13172	2.87082	2.61629	0.048203	0.492395	-4.77153	UP
TTP	-3.71817	4.31227	-2.61389	0.0483412	0.492409	-4.77465	DOWN
VAMP4	3.02174	1.92245	2.61141	0.0484848	0.492424	-4.77788	UP
CTNNA1	4.03562	3.71953	2.61074	0.0485235	0.492424	-4.77876	UP
NPEPL1	2.09043	3.68864	2.6085	0.0486535	0.49311	-4.78167	UP
NUDT9	2.18869	3.80789	2.60681	0.0487517	0.493487	-4.78387	UP
MAP3K7	1.98438	1.78292	2.60618	0.0487884	0.493487	-4.78469	UP
SDHB	2.64229	4.97052	2.60356	0.0489416	0.494226	-4.78811	UP
NRAS	3.45675	3.16107	2.60276	0.0489882	0.494292	-4.78915	UP
LRRC6	-3.80008	3.69159	-2.60073	0.0491074	0.494572	-4.7918	DOWN
HYOU1	-4.72844	4.52267	-2.60036	0.0491293	0.494572	-4.79228	DOWN
NIT2	4.72518	4.02868	2.59542	0.0494201	0.496073	-4.79871	UP
GPR133	7.2415	4.42875	2.58871	0.0498187	0.496876	-4.80747	UP
MINOS1	3.00574	4.12798	2.58713	0.0499127	0.496942	-4.80952	UP

## Sheet: S4
Table S4: GO enrichment(BP: biological process; CC: cellular component; MF: molecular function) of differentially expressed genes
ID	ONTOLOGY	Description	GeneRatio	BgRatio	pvalue	p.adjust	qvalue	geneID	Count
Biological process
GO:0007229	BP	integrin-mediated signaling pathway	7/212	37/6338	0.000185674	0.379517	0.363139	ADAMTS20/ADAM15/ABL1/PTN/ITGB8/PTPN11/TIMP1	7
GO:0045185	BP	maintenance of protein location	4/212	17/6338	0.0020549	0.491045	0.469853	SRI/KEAP1/MORC3/NFKBIA	4
GO:0051098	BP	regulation of binding	8/212	71/6338	0.00238443	0.491045	0.469853	SRI/MET/ADAM15/LOX/ABL1/TFIP11/HMGB2/STUB1	8
GO:0051235	BP	maintenance of location	8/212	72/6338	0.00260708	0.491045	0.469853	HRC/SRI/PPARD/KEAP1/ABL1/MORC3/NFKBIA/STAT5B	8
GO:0006511	BP	ubiquitin-dependent protein catabolic process	14/212	183/6338	0.00314005	0.491045	0.469853	NTAN1/FBXO6/KEAP1/DERL3/PSMB1/USP37/SOCS5/RNF4/PSMD4/KCTD5/RNF125/RNF128/STUB1/USP7	14
GO:0006635	BP	fatty acid beta-oxidation	4/212	19/6338	0.00317543	0.491045	0.469853	ACAT1/PPARD/HADH/CPT1A	4
GO:1905953	BP	negative regulation of lipid localization	3/212	10/6338	0.0037202	0.491045	0.469853	PPARD/NFKBIA/PTPN11	3
GO:0019941	BP	modification-dependent protein catabolic process	14/212	187/6338	0.00382075	0.491045	0.469853	NTAN1/FBXO6/KEAP1/DERL3/PSMB1/USP37/SOCS5/RNF4/PSMD4/KCTD5/RNF125/RNF128/STUB1/USP7	14
GO:0043632	BP	modification-dependent macromolecule catabolic process	14/212	189/6338	0.00420373	0.491045	0.469853	NTAN1/FBXO6/KEAP1/DERL3/PSMB1/USP37/SOCS5/RNF4/PSMD4/KCTD5/RNF125/RNF128/STUB1/USP7	14
GO:0044092	BP	negative regulation of molecular function	14/212	192/6338	0.00483627	0.491045	0.469853	SRI/RECK/HDAC2/KEAP1/MET/ADAM15/ABL1/TFIP11/SOCS5/ANGPTL4/STUB1/PAQR3/NFKBIA/TIMP1	14
GO:0016477	BP	cell migration	22/212	365/6338	0.00498853	0.491045	0.469853	IGF1R/RHOQ/PPARD/PTK7/DUSP3/MIF/MET/MEGF8/ADAM15/ARPC5/MSN/LOX/CHL1/ABL1/CDC42/CAP1/PTN/FOXE1/TMEM201/PTPN11/ADORA1/DPP4	22
GO:0032743	BP	positive regulation of interleukin-2 production	3/212	11/6338	0.00499012	0.491045	0.469853	ABL1/STAT5B/MAP3K7	3
GO:0043393	BP	regulation of protein binding	5/212	34/6338	0.00503637	0.491045	0.469853	ADAM15/LOX/ABL1/TFIP11/STUB1	5
GO:0001667	BP	ameboidal-type cell migration	9/212	100/6338	0.00602284	0.491045	0.469853	PPARD/MET/MEGF8/ABL1/CAP1/PTN/TMEM201/PTPN11/DPP4	9
GO:0007254	BP	JNK cascade	5/212	36/6338	0.0064647	0.491045	0.469853	KLHL31/IGF1R/DUSP3/TNFRSF19/MAP3K7	5
GO:0031113	BP	regulation of microtubule polymerization	3/212	12/6338	0.00649097	0.491045	0.469853	MET/ABL1/DYRK1A	3
GO:0051403	BP	stress-activated MAPK cascade	6/212	51/6338	0.00669048	0.491045	0.469853	KLHL31/IGF1R/DUSP3/LEP/TNFRSF19/MAP3K7	6
GO:0080134	BP	regulation of response to stress	18/212	286/6338	0.0070271	0.491045	0.469853	KLHL31/IGF1R/PPARD/SESN3/DUSP3/MIF/MET/LEP/CD47/TNFAIP8L2/ABL1/SOCS5/DYRK1A/PTN/TNFRSF19/NFKBIA/STAT5B/ADORA1	18
GO:0043408	BP	regulation of MAPK cascade	12/212	160/6338	0.00711716	0.491045	0.469853	KLHL31/IGF1R/DUSP3/MIF/LEMD2/LEP/ABL1/FZD5/PAQR3/TNFRSF19/PTPN11/MAP3K7	12
GO:0031098	BP	stress-activated protein kinase signaling cascade	6/212	52/6338	0.00735742	0.491045	0.469853	KLHL31/IGF1R/DUSP3/LEP/TNFRSF19/MAP3K7	6
GO:0007155	BP	cell adhesion	20/212	332/6338	0.00737975	0.491045	0.469853	FIBCD1/PPARD/PTK7/DUSP3/CD164/ADAM15/LEP/CD47/MSN/TNFAIP8L2/CHL1/ABL1/JUP/CDC42/SOCS5/ITGB8/PTPN11/STAT5B/DPP4/CTNNA1	20
GO:0032760	BP	positive regulation of tumor necrosis factor production	4/212	24/6338	0.00763884	0.491045	0.469853	MIF/LEP/FZD5/PTPN11	4
GO:0022610	BP	biological adhesion	20/212	336/6338	0.00838649	0.491045	0.469853	FIBCD1/PPARD/PTK7/DUSP3/CD164/ADAM15/LEP/CD47/MSN/TNFAIP8L2/CHL1/ABL1/JUP/CDC42/SOCS5/ITGB8/PTPN11/STAT5B/DPP4/CTNNA1	20
GO:0044257	BP	cellular protein catabolic process	15/212	226/6338	0.00846789	0.491045	0.469853	NTAN1/FBXO6/KEAP1/DERL3/PSMB1/USP37/SOCS5/RNF4/PSMD4/LAMP2/KCTD5/RNF125/RNF128/STUB1/USP7	15
GO:0006468	BP	protein phosphorylation	21/212	361/6338	0.00896589	0.491045	0.469853	KLHL31/GTF2H5/IGF1R/HRC/CDK16/MIF/CCNI/LEP/LOX/ABL1/FZD5/CLK1/SOCS5/DYRK1A/HSPB1/MORC3/PIM2/CDK3/PAQR3/PTPN11/MAP3K7	21
GO:0051249	BP	regulation of lymphocyte activation	9/212	107/6338	0.00929148	0.491045	0.469853	DUSP3/STAT6/MIF/LEP/TNFAIP8L2/ABL1/SOCS5/STAT5B/DPP4	9
GO:0051347	BP	positive regulation of transferase activity	9/212	107/6338	0.00929148	0.491045	0.469853	MIF/MET/LEP/ABL1/FZD5/DCUN1D4/STUB1/HMBOX1/MAP3K7	9
GO:1902532	BP	negative regulation of intracellular signal transduction	10/212	126/6338	0.00929391	0.491045	0.469853	KLHL31/SESN3/DUSP3/MIF/MET/LEMD2/ABL1/DYRK1A/TSC2/PAQR3	10
GO:0007169	BP	transmembrane receptor protein tyrosine kinase signaling pathway	12/212	167/6338	0.00988108	0.491045	0.469853	SLA/RHOQ/SESN3/STAT6/FAM83A/MET/LEP/LOX/ABL1/SOCS5/PTPN11/STAT5B	12
GO:0032101	BP	regulation of response to external stimulus	14/212	209/6338	0.0100258	0.491045	0.469853	PPARD/DUSP3/MIF/MET/MEGF8/PUM2/LEP/CD47/TNFAIP8L2/SOCS5/PTN/NFKBIA/STAT5B/ADORA1	14
GO:0008286	BP	insulin receptor signaling pathway	4/212	26/6338	0.010202	0.491045	0.469853	RHOQ/SESN3/LEP/PTPN11	4
GO:1903557	BP	positive regulation of tumor necrosis factor superfamily cytokine production	4/212	26/6338	0.010202	0.491045	0.469853	MIF/LEP/FZD5/PTPN11	4
GO:0051279	BP	regulation of release of sequestered calcium ion into cytosol	3/212	14/6338	0.0102226	0.491045	0.469853	HRC/SRI/ABL1	3
GO:0048870	BP	cell motility	23/212	413/6338	0.010493	0.491045	0.469853	IGF1R/RHOQ/PPARD/PTK7/DUSP3/MNS1/MIF/MET/MEGF8/ADAM15/ARPC5/MSN/LOX/CHL1/ABL1/CDC42/CAP1/PTN/FOXE1/TMEM201/PTPN11/ADORA1/DPP4	23
GO:0051674	BP	localization of cell	23/212	413/6338	0.010493	0.491045	0.469853	IGF1R/RHOQ/PPARD/PTK7/DUSP3/MNS1/MIF/MET/MEGF8/ADAM15/ARPC5/MSN/LOX/CHL1/ABL1/CDC42/CAP1/PTN/FOXE1/TMEM201/PTPN11/ADORA1/DPP4	23
GO:0016054	BP	organic acid catabolic process	7/212	73/6338	0.010648	0.491045	0.469853	ACAT1/PPARD/HDC/HADH/BCKDHA/CPT1A/IDO1	7
GO:0046395	BP	carboxylic acid catabolic process	7/212	73/6338	0.010648	0.491045	0.469853	ACAT1/PPARD/HDC/HADH/BCKDHA/CPT1A/IDO1	7
GO:0033554	BP	cellular response to stress	26/212	487/6338	0.0112047	0.491045	0.469853	KLHL31/GTF2H5/IGF1R/PPARD/FBXO6/SESN3/KEAP1/DUSP3/MIF/MET/MIOS/DERL3/LEP/MAP1LC3A/ABL1/SOCS5/DYRK1A/HMGB2/LAMP2/PTN/STUB1/SUPT16H/TNFRSF19/RBBP8/PTPN11/MAP3K7	26
GO:0018108	BP	peptidyl-tyrosine phosphorylation	7/212	74/6338	0.0114365	0.491045	0.469853	IGF1R/MIF/LEP/ABL1/SOCS5/DYRK1A/PTPN11	7
GO:1901653	BP	cellular response to peptide	7/212	74/6338	0.0114365	0.491045	0.469853	IGF1R/RHOQ/SESN3/STAT6/LEP/PTPN11/STAT5B	7
GO:0019395	BP	fatty acid oxidation	4/212	27/6338	0.0116691	0.491045	0.469853	ACAT1/PPARD/HADH/CPT1A	4
GO:0007162	BP	negative regulation of cell adhesion	6/212	58/6338	0.0124016	0.491045	0.469853	DUSP3/ADAM15/TNFAIP8L2/ABL1/SOCS5/PTPN11	6
GO:0018212	BP	peptidyl-tyrosine modification	7/212	76/6338	0.0131391	0.491045	0.469853	IGF1R/MIF/LEP/ABL1/SOCS5/DYRK1A/PTPN11	7
GO:0032102	BP	negative regulation of response to external stimulus	7/212	76/6338	0.0131391	0.491045	0.469853	PPARD/DUSP3/MIF/LEP/TNFAIP8L2/SOCS5/ADORA1	7
GO:0051603	BP	proteolysis involved in cellular protein catabolic process	14/212	216/6338	0.0131443	0.491045	0.469853	NTAN1/FBXO6/KEAP1/DERL3/PSMB1/USP37/SOCS5/RNF4/PSMD4/KCTD5/RNF125/RNF128/STUB1/USP7	14
GO:0042110	BP	T cell activation	11/212	153/6338	0.0132099	0.491045	0.469853	DUSP3/STAT6/CD3D/LEP/MSN/TNFAIP8L2/ABL1/FZD5/SOCS5/STAT5B/DPP4	11
GO:0007173	BP	epidermal growth factor receptor signaling pathway	4/212	28/6338	0.0132651	0.491045	0.469853	FAM83A/ABL1/SOCS5/PTPN11	4
GO:0034440	BP	lipid oxidation	4/212	28/6338	0.0132651	0.491045	0.469853	ACAT1/PPARD/HADH/CPT1A	4
GO:0045931	BP	positive regulation of mitotic cell cycle	4/212	28/6338	0.0132651	0.491045	0.469853	DUSP3/ABL1/PTPN11/STAT5B	4
GO:0000165	BP	MAPK cascade	12/212	174/6338	0.0134161	0.491045	0.469853	KLHL31/IGF1R/DUSP3/MIF/LEMD2/LEP/ABL1/FZD5/PAQR3/TNFRSF19/PTPN11/MAP3K7	12
GO:0043409	BP	negative regulation of MAPK cascade	5/212	43/6338	0.0136736	0.491045	0.469853	KLHL31/DUSP3/LEMD2/ABL1/PAQR3	5
GO:1901652	BP	response to peptide	8/212	95/6338	0.0137856	0.491045	0.469853	IGF1R/RHOQ/SESN3/STAT6/LEP/NFKBIA/PTPN11/STAT5B	8
GO:0000387	BP	spliceosomal snRNP assembly	3/212	16/6338	0.0149726	0.491045	0.469853	SNRPD3/GEMIN8/SNRPC	3
GO:0046626	BP	regulation of insulin receptor signaling pathway	3/212	16/6338	0.0149726	0.491045	0.469853	SESN3/LEP/PTPN11	3
GO:0009062	BP	fatty acid catabolic process	4/212	29/6338	0.0149937	0.491045	0.469853	ACAT1/PPARD/HADH/CPT1A	4
GO:0031346	BP	positive regulation of cell projection organization	6/212	61/6338	0.015669	0.491045	0.469853	RHOQ/PTK7/MNS1/MEGF8/CDC42/PTN	6
GO:1901565	BP	organonitrogen compound catabolic process	21/212	381/6338	0.015857	0.491045	0.469853	NTAN1/FBXO6/KEAP1/DERL3/HDC/BCKDHA/PSMB1/BLVRA/SMPDL3A/USP37/SOCS5/RNF4/PSMD4/LAMP2/KCTD5/RNF125/RNF128/STUB1/USP7/IDO1/TIMP1	21
GO:0044265	BP	cellular macromolecule catabolic process	18/212	313/6338	0.0168257	0.491045	0.469853	PABPC4/NTAN1/FBXO6/KEAP1/DERL3/PUM2/PSMB1/USP37/SOCS5/RNF4/PSMD4/LAMP2/KCTD5/LSM1/RNF125/RNF128/STUB1/USP7	18
GO:0032006	BP	regulation of TOR signaling	4/212	30/6338	0.0168583	0.491045	0.469853	SESN3/MIOS/LEP/TSC2	4
GO:0071375	BP	cellular response to peptide hormone stimulus	6/212	62/6338	0.0168792	0.491045	0.469853	RHOQ/SESN3/STAT6/LEP/PTPN11/STAT5B	6
GO:0022407	BP	regulation of cell-cell adhesion	8/212	99/6338	0.017345	0.491045	0.469853	DUSP3/LEP/CD47/TNFAIP8L2/ABL1/SOCS5/STAT5B/DPP4	8
GO:0001738	BP	morphogenesis of a polarized epithelium	3/212	17/6338	0.0177407	0.491045	0.469853	PTK7/ABL1/CDC42	3
GO:0032091	BP	negative regulation of protein binding	3/212	17/6338	0.0177407	0.491045	0.469853	ADAM15/TFIP11/STUB1	3
GO:0046785	BP	microtubule polymerization	3/212	17/6338	0.0177407	0.491045	0.469853	MET/ABL1/DYRK1A	3
GO:0030163	BP	protein catabolic process	16/212	270/6338	0.0183195	0.491045	0.469853	NTAN1/FBXO6/KEAP1/DERL3/PSMB1/USP37/SOCS5/RNF4/PSMD4/LAMP2/KCTD5/RNF125/RNF128/STUB1/USP7/TIMP1	16
GO:0006520	BP	cellular amino acid metabolic process	8/212	100/6338	0.0183295	0.491045	0.469853	BCAT2/HDC/BCKDHA/DEDD/GATC/BHMT/IDO1/NIT2	8
GO:0045944	BP	positive regulation of transcription by RNA polymerase II	15/212	249/6338	0.0192819	0.491045	0.469853	HDAC2/RHOQ/PPARD/STAT6/MET/PYGO1/MED10/JUP/FZD5/RNF4/HMGB2/LUM/SUPT16H/NFKBIA/STAT5B	15
GO:0010243	BP	response to organonitrogen compound	12/212	183/6338	0.019296	0.491045	0.469853	IGF1R/RHOQ/FBXO6/SESN3/STAT6/DERL3/LEP/SOCS5/STUB1/NFKBIA/PTPN11/STAT5B	12
GO:0080135	BP	regulation of cellular response to stress	10/212	141/6338	0.019359	0.491045	0.469853	KLHL31/IGF1R/DUSP3/MIF/MET/LEP/ABL1/DYRK1A/PTN/TNFRSF19	10
GO:0040011	BP	locomotion	24/212	461/6338	0.0193671	0.491045	0.469853	IGF1R/RHOQ/PPARD/PTK7/DUSP3/MNS1/MIF/MET/MEGF8/ADAM15/ARPC5/MSN/LOX/CHL1/ABL1/CDC42/CAP1/HMGB2/PTN/FOXE1/TMEM201/PTPN11/ADORA1/DPP4	24
GO:0032872	BP	regulation of stress-activated MAPK cascade	5/212	47/6338	0.0195771	0.491045	0.469853	KLHL31/IGF1R/DUSP3/LEP/TNFRSF19	5
GO:0070302	BP	regulation of stress-activated protein kinase signaling cascade	5/212	47/6338	0.0195771	0.491045	0.469853	KLHL31/IGF1R/DUSP3/LEP/TNFRSF19	5
GO:0016310	BP	phosphorylation	22/212	413/6338	0.0195856	0.491045	0.469853	KLHL31/GTF2H5/IGF1R/HRC/CDK16/MIF/MET/CCNI/LEP/LOX/ABL1/FZD5/CLK1/SOCS5/DYRK1A/HSPB1/MORC3/PIM2/CDK3/PAQR3/PTPN11/MAP3K7	22
GO:0098609	BP	cell-cell adhesion	12/212	184/6338	0.0200524	0.491045	0.469853	DUSP3/CD164/LEP/CD47/MSN/TNFAIP8L2/CHL1/ABL1/SOCS5/STAT5B/DPP4/CTNNA1	12
GO:0050863	BP	regulation of T cell activation	7/212	83/6338	0.0205348	0.491045	0.469853	DUSP3/LEP/TNFAIP8L2/ABL1/SOCS5/STAT5B/DPP4	7
GO:0009066	BP	aspartate family amino acid metabolic process	3/212	18/6338	0.0207742	0.491045	0.469853	DEDD/BHMT/NIT2	3
GO:0032623	BP	interleukin-2 production	3/212	18/6338	0.0207742	0.491045	0.469853	ABL1/STAT5B/MAP3K7	3
GO:0032663	BP	regulation of interleukin-2 production	3/212	18/6338	0.0207742	0.491045	0.469853	ABL1/STAT5B/MAP3K7	3
GO:0046324	BP	regulation of glucose import	3/212	18/6338	0.0207742	0.491045	0.469853	RHOQ/LEP/PTPN11	3
GO:0051438	BP	regulation of ubiquitin-protein transferase activity	3/212	18/6338	0.0207742	0.491045	0.469853	ABL1/DCUN1D4/STUB1	3
GO:0038127	BP	ERBB signaling pathway	4/212	32/6338	0.0210065	0.491045	0.469853	FAM83A/ABL1/SOCS5/PTPN11	4
GO:0051100	BP	negative regulation of binding	4/212	32/6338	0.0210065	0.491045	0.469853	SRI/ADAM15/TFIP11/STUB1	4
GO:0007167	BP	enzyme linked receptor protein signaling pathway	15/212	252/6338	0.0212442	0.491045	0.469853	SLA/RHOQ/SESN3/STAT6/FAM83A/MET/MEGF8/LEMD2/LEP/LOX/ABL1/SOCS5/STUB1/PTPN11/STAT5B	15
GO:0032103	BP	positive regulation of response to external stimulus	8/212	103/6338	0.0215232	0.491045	0.469853	MIF/MET/MEGF8/PUM2/CD47/PTN/NFKBIA/STAT5B	8
GO:0050727	BP	regulation of inflammatory response	7/212	84/6338	0.0217879	0.491045	0.469853	PPARD/CD47/TNFAIP8L2/SOCS5/NFKBIA/STAT5B/ADORA1	7
GO:0010648	BP	negative regulation of cell communication	18/212	323/6338	0.0224074	0.491045	0.469853	KLHL31/SESN3/DUSP3/MIF/MET/MEGF8/LEMD2/LEP/ABL1/SOCS5/DYRK1A/HMGB2/TSC2/STUB1/PAQR3/NFKBIA/PTPN11/ADORA1	18
GO:0072594	BP	establishment of protein localization to organelle	8/212	104/6338	0.0226703	0.491045	0.469853	PEX6/KPNA3/SRP9/KPNB1/LAMP2/SEC61A2/NFKBIA/TOMM7	8
GO:0023057	BP	negative regulation of signaling	18/212	324/6338	0.0230355	0.491045	0.469853	KLHL31/SESN3/DUSP3/MIF/MET/MEGF8/LEMD2/LEP/ABL1/SOCS5/DYRK1A/HMGB2/TSC2/STUB1/PAQR3/NFKBIA/PTPN11/ADORA1	18
GO:0046328	BP	regulation of JNK cascade	4/212	33/6338	0.0232952	0.491045	0.469853	KLHL31/IGF1R/DUSP3/TNFRSF19	4
GO:0051338	BP	regulation of transferase activity	12/212	188/6338	0.0233012	0.491045	0.469853	MIF/MET/CCNI/LEP/ABL1/FZD5/SOCS5/DCUN1D4/STUB1/HMBOX1/PAQR3/MAP3K7	12
GO:0048585	BP	negative regulation of response to stimulus	20/212	373/6338	0.0239811	0.491045	0.469853	KLHL31/PPARD/SESN3/DUSP3/STAT6/MIF/MET/MEGF8/LEMD2/LEP/TNFAIP8L2/ABL1/SOCS5/DYRK1A/HMGB2/TSC2/STUB1/PAQR3/NFKBIA/ADORA1	20
GO:0002720	BP	positive regulation of cytokine production involved in immune response	3/212	19/6338	0.0240739	0.491045	0.469853	MIF/FZD5/MAP3K7	3
GO:0010522	BP	regulation of calcium ion transport into cytosol	3/212	19/6338	0.0240739	0.491045	0.469853	HRC/SRI/ABL1	3
GO:0043406	BP	positive regulation of MAP kinase activity	3/212	19/6338	0.0240739	0.491045	0.469853	MIF/FZD5/MAP3K7	3
GO:0050920	BP	regulation of chemotaxis	5/212	50/6338	0.0249609	0.491045	0.469853	DUSP3/MIF/MET/MEGF8/PTN	5
GO:0033365	BP	protein localization to organelle	12/212	190/6338	0.0250643	0.491045	0.469853	PEX6/KPNA3/PYGO1/SRP9/KPNB1/LEMD2/LAMP2/MORC3/SEC61A2/PAQR3/NFKBIA/TOMM7	12
GO:0010631	BP	epithelial cell migration	6/212	68/6338	0.0255093	0.491045	0.469853	PPARD/MET/ABL1/PTN/PTPN11/DPP4	6
GO:0090132	BP	epithelium migration	6/212	68/6338	0.0255093	0.491045	0.469853	PPARD/MET/ABL1/PTN/PTPN11/DPP4	6
GO:0002702	BP	positive regulation of production of molecular mediator of immune response	4/212	34/6338	0.0257298	0.491045	0.469853	STAT6/MIF/FZD5/MAP3K7	4
GO:0032640	BP	tumor necrosis factor production	4/212	34/6338	0.0257298	0.491045	0.469853	MIF/LEP/FZD5/PTPN11	4
GO:0032680	BP	regulation of tumor necrosis factor production	4/212	34/6338	0.0257298	0.491045	0.469853	MIF/LEP/FZD5/PTPN11	4
GO:0050728	BP	negative regulation of inflammatory response	4/212	34/6338	0.0257298	0.491045	0.469853	PPARD/TNFAIP8L2/SOCS5/ADORA1	4
GO:0072329	BP	monocarboxylic acid catabolic process	4/212	34/6338	0.0257298	0.491045	0.469853	ACAT1/PPARD/HADH/CPT1A	4
GO:0030155	BP	regulation of cell adhesion	11/212	170/6338	0.0267686	0.491045	0.469853	DUSP3/ADAM15/LEP/CD47/TNFAIP8L2/ABL1/CDC42/SOCS5/PTPN11/STAT5B/DPP4	11
GO:0002694	BP	regulation of leukocyte activation	9/212	128/6338	0.0271719	0.491045	0.469853	DUSP3/STAT6/MIF/LEP/TNFAIP8L2/ABL1/SOCS5/STAT5B/DPP4	9
GO:0030217	BP	T cell differentiation	6/212	69/6338	0.0271877	0.491045	0.469853	STAT6/CD3D/LEP/ABL1/FZD5/SOCS5	6
GO:0002260	BP	lymphocyte homeostasis	3/212	20/6338	0.0276399	0.491045	0.469853	MIF/ABL1/STAT5B	3
GO:0048008	BP	platelet-derived growth factor receptor signaling pathway	3/212	20/6338	0.0276399	0.491045	0.469853	LOX/ABL1/PTPN11	3
GO:0050806	BP	positive regulation of synaptic transmission	3/212	20/6338	0.0276399	0.491045	0.469853	ABL1/PTN/ADORA1	3
GO:0051209	BP	release of sequestered calcium ion into cytosol	3/212	20/6338	0.0276399	0.491045	0.469853	HRC/SRI/ABL1	3
GO:0051282	BP	regulation of sequestering of calcium ion	3/212	20/6338	0.0276399	0.491045	0.469853	HRC/SRI/ABL1	3
GO:0051283	BP	negative regulation of sequestering of calcium ion	3/212	20/6338	0.0276399	0.491045	0.469853	HRC/SRI/ABL1	3
GO:0065002	BP	intracellular protein transmembrane transport	3/212	20/6338	0.0276399	0.491045	0.469853	PEX6/SEC61A2/TOMM7	3
GO:0071806	BP	protein transmembrane transport	3/212	20/6338	0.0276399	0.491045	0.469853	PEX6/SEC61A2/TOMM7	3
GO:0007159	BP	leukocyte cell-cell adhesion	7/212	89/6338	0.0288543	0.491045	0.469853	DUSP3/LEP/MSN/TNFAIP8L2/SOCS5/STAT5B/DPP4	7
GO:0051251	BP	positive regulation of lymphocyte activation	6/212	70/6338	0.0289379	0.491045	0.469853	STAT6/MIF/LEP/SOCS5/STAT5B/DPP4	6
GO:0043491	BP	protein kinase B signaling	5/212	52/6338	0.0290308	0.491045	0.469853	SESN3/MET/LEMD2/LEP/LOX	5
GO:0043161	BP	proteasome-mediated ubiquitin-dependent protein catabolic process	8/212	109/6338	0.0290581	0.491045	0.469853	FBXO6/DERL3/PSMB1/SOCS5/RNF4/PSMD4/KCTD5/STUB1	8
GO:0044282	BP	small molecule catabolic process	8/212	110/6338	0.030471	0.491045	0.469853	ACAT1/PPARD/HDC/HADH/BCKDHA/IMPA1/CPT1A/IDO1	8
GO:0090130	BP	tissue migration	6/212	71/6338	0.0307607	0.491045	0.469853	PPARD/MET/ABL1/PTN/PTPN11/DPP4	6
GO:0045893	BP	positive regulation of transcription, DNA-templated	18/212	335/6338	0.0308659	0.491045	0.469853	HDAC2/RHOQ/PPARD/STAT6/MET/PYGO1/MED10/JUP/FZD5/DYRK1A/RNF4/HMGB2/FOXE1/LUM/HMBOX1/SUPT16H/NFKBIA/STAT5B	18
GO:1902680	BP	positive regulation of RNA biosynthetic process	18/212	335/6338	0.0308659	0.491045	0.469853	HDAC2/RHOQ/PPARD/STAT6/MET/PYGO1/MED10/JUP/FZD5/DYRK1A/RNF4/HMGB2/FOXE1/LUM/HMBOX1/SUPT16H/NFKBIA/STAT5B	18
GO:1903508	BP	positive regulation of nucleic acid-templated transcription	18/212	335/6338	0.0308659	0.491045	0.469853	HDAC2/RHOQ/PPARD/STAT6/MET/PYGO1/MED10/JUP/FZD5/DYRK1A/RNF4/HMGB2/FOXE1/LUM/HMBOX1/SUPT16H/NFKBIA/STAT5B	18
GO:0009267	BP	cellular response to starvation	4/212	36/6338	0.0310427	0.491045	0.469853	SESN3/MIOS/MAP1LC3A/LAMP2	4
GO:0071706	BP	tumor necrosis factor superfamily cytokine production	4/212	36/6338	0.0310427	0.491045	0.469853	MIF/LEP/FZD5/PTPN11	4
GO:1903555	BP	regulation of tumor necrosis factor superfamily cytokine production	4/212	36/6338	0.0310427	0.491045	0.469853	MIF/LEP/FZD5/PTPN11	4
GO:0017038	BP	protein import	5/212	53/6338	0.0312141	0.491045	0.469853	PEX6/KPNA3/KPNB1/NFKBIA/TOMM7	5
GO:0046323	BP	glucose import	3/212	21/6338	0.0314711	0.491045	0.469853	RHOQ/LEP/PTPN11	3
GO:0050871	BP	positive regulation of B cell activation	3/212	21/6338	0.0314711	0.491045	0.469853	STAT6/MIF/STAT5B	3
GO:0051208	BP	sequestering of calcium ion	3/212	21/6338	0.0314711	0.491045	0.469853	HRC/SRI/ABL1	3
GO:0140353	BP	lipid export from cell	3/212	21/6338	0.0314711	0.491045	0.469853	MIF/LEP/PTPN11	3
Cellular component
GO:0043230	CC	extracellular organelle	6/238	17/7505	8.81311e-06	0.000784367	0.000720511	SRI/ADAM15/CD47/LAMP2/PROM1/BHMT	6
GO:0065010	CC	extracellular membrane-bounded organelle	6/238	17/7505	8.81311e-06	0.000784367	0.000720511	SRI/ADAM15/CD47/LAMP2/PROM1/BHMT	6
GO:1903561	CC	extracellular vesicle	6/238	17/7505	8.81311e-06	0.000784367	0.000720511	SRI/ADAM15/CD47/LAMP2/PROM1/BHMT	6
GO:0070062	CC	extracellular exosome	5/238	14/7505	4.87034e-05	0.00325095	0.00298629	SRI/ADAM15/CD47/LAMP2/BHMT	5
GO:0000151	CC	ubiquitin ligase complex	8/238	74/7505	0.00225181	0.120247	0.110457	FBXO6/KEAP1/DERL3/KCTD5/DCUN1D4/FBXO11/STUB1/YPEL5	8
GO:1990234	CC	transferase complex	17/238	256/7505	0.0030927	0.134633	0.123672	GTF2H5/IGF1R/HDAC2/FBXO6/KEAP1/DERL3/CCNI/PRPSAP1/SOCS5/KCTD5/DCUN1D4/FBXO11/STUB1/SPTLC1/YPEL5/LEO1/MAP3K7	17
GO:0030867	CC	rough endoplasmic reticulum membrane	5/238	33/7505	0.0035297	0.134633	0.123672	RPL22/RPL31/RPS17/SEC61A2/RPL35	5
GO:0140534	CC	endoplasmic reticulum protein-containing complex	6/238	53/7505	0.00630084	0.189185	0.173783	GANAB/DERL3/RINT1/SEC61A2/RNF125/SPTLC1	6
GO:1902494	CC	catalytic complex	26/238	498/7505	0.00793521	0.189185	0.173783	GTF2H5/IGF1R/HDAC2/FBXO6/KEAP1/DERL3/MTA2/CCNI/PSMB1/PPP3CB/PRPSAP1/TFIP11/SMARCA4/SOCS5/PSMD4/KCTD5/NDUFV1/DCUN1D4/FBXO11/NDUFB2/STUB1/SPTLC1/YPEL5/LEO1/MAP3K7/SDHB	26
GO:0140535	CC	intracellular protein-containing complex	16/238	259/7505	0.0080634	0.189185	0.173783	GTF2H5/FBXO6/SESN3/KEAP1/DERL3/PSMB1/PPP3CB/TRAPPC4/PSMD4/KCTD5/GATC/DCUN1D4/FBXO11/STUB1/YPEL5/LEO1	16
GO:0030018	CC	Z disc	4/238	26/7505	0.00851104	0.189185	0.173783	HRC/SRI/NEBL/STUB1	4
GO:0098556	CC	cytoplasmic side of rough endoplasmic reticulum membrane	4/238	26/7505	0.00851104	0.189185	0.173783	RPL22/RPL31/RPS17/RPL35	4
GO:0000785	CC	chromatin	11/238	153/7505	0.00921126	0.189185	0.173783	HDAC2/HMGA1/PPARD/STAT6/MTA2/MED10/LEMD2/UXT/SMARCA4/HMGB2/SUPT16H	11
GO:0031674	CC	I band	4/238	29/7505	0.0125569	0.209692	0.192621	HRC/SRI/NEBL/STUB1	4
GO:0005791	CC	rough endoplasmic reticulum	5/238	45/7505	0.0133663	0.209692	0.192621	RPL22/RPL31/RPS17/SEC61A2/RPL35	5
GO:1990904	CC	ribonucleoprotein complex	16/238	274/7505	0.0133812	0.209692	0.192621	RPL22/SNRPD3/PRPF3/PABPC4/SRP9/EIF3I/RPL31/RPS17/RRP15/TFIP11/RPL7L1/DYRK1A/SNRPC/MRPS5/UTP18/RPL35	16
GO:0005694	CC	chromosome	17/238	299/7505	0.013985	0.209692	0.192621	HDAC2/HMGA1/PPARD/STAT6/NUP43/HAT1/MTA2/MED10/LEMD2/UXT/TFIP11/SMARCA4/HMGB2/HMBOX1/SUPT16H/RBBP8/SUV39H2	17
GO:0098554	CC	cytoplasmic side of endoplasmic reticulum membrane	4/238	30/7505	0.0141365	0.209692	0.192621	RPL22/RPL31/RPS17/RPL35	4
GO:0005902	CC	microvillus	3/238	18/7505	0.018066	0.241181	0.221546	MSN/PROM1/NF2	3
GO:0030173	CC	integral component of Golgi membrane	3/238	18/7505	0.018066	0.241181	0.221546	BET1/IER3IP1/SLC35B2	3
GO:0031228	CC	intrinsic component of Golgi membrane	3/238	19/7505	0.0209612	0.243332	0.223522	BET1/IER3IP1/SLC35B2	3
GO:0043197	CC	dendritic spine	3/238	19/7505	0.0209612	0.243332	0.223522	SLA/CDC42/ADORA1	3
GO:0044309	CC	neuron spine	3/238	19/7505	0.0209612	0.243332	0.223522	SLA/CDC42/ADORA1	3
GO:0061695	CC	transferase complex, transferring phosphorus-containing groups	7/238	91/7505	0.0250525	0.278709	0.256019	GTF2H5/IGF1R/CCNI/PRPSAP1/SOCS5/LEO1/MAP3K7	7
GO:1902911	CC	protein kinase complex	4/238	37/7505	0.0287003	0.306519	0.281565	GTF2H5/IGF1R/CCNI/MAP3K7	4
GO:0031301	CC	integral component of organelle membrane	8/238	116/7505	0.0307064	0.307343	0.282322	BET1/DERL3/LEMD2/IER3IP1/LAMP2/SLC35B2/APOO/TMEM201	8
GO:0034451	CC	centriolar satellite	3/238	22/7505	0.0310796	0.307343	0.282322	KEAP1/UBN1/RBM39	3
GO:0000421	CC	autophagosome membrane	2/238	10/7505	0.0381015	0.333135	0.306014	MAP1LC3A/LAMP2	2
GO:0016234	CC	inclusion body	2/238	10/7505	0.0381015	0.333135	0.306014	KEAP1/STUB1	2
GO:0030670	CC	phagocytic vesicle membrane	2/238	10/7505	0.0381015	0.333135	0.306014	LAMP2/RAB9A	2
GO:0031300	CC	intrinsic component of organelle membrane	8/238	122/7505	0.039682	0.333135	0.306014	BET1/DERL3/LEMD2/IER3IP1/LAMP2/SLC35B2/APOO/TMEM201	8
GO:0120114	CC	Sm-like protein family complex	4/238	41/7505	0.0399263	0.333135	0.306014	PRPF3/GEMIN8/LSM1/SNRPC	4
GO:0070603	CC	SWI/SNF superfamily-type complex	3/238	25/7505	0.0433214	0.3402	0.312504	HDAC2/MTA2/SMARCA4	3
GO:1904949	CC	ATPase complex	3/238	25/7505	0.0433214	0.3402	0.312504	HDAC2/MTA2/SMARCA4	3
Molecular function
GO:0002020	MF	protease binding	6/237	28/6996	0.000285495	0.105348	0.100073	SRI/MIF/DERL3/CHL1/TIMP1/DPP4	6
GO:0005048	MF	signal sequence binding	4/237	14/6996	0.000983013	0.153214	0.145543	KPNA3/KPNB1/SEC61A2/NFKBIA	4
GO:0003779	MF	actin binding	13/237	150/6996	0.00165448	0.153214	0.145543	CNN1/CALD1/ARPC5/MARCKSL1/MSN/NEBL/ABL1/CORO2A/CAP1/TMEM201/NF2/PLS3/CTNNA1	13
GO:0030971	MF	receptor tyrosine kinase binding	4/237	16/6996	0.0016943	0.153214	0.145543	DUSP3/SOCS5/PTPN11/MAP3K7	4
GO:0019899	MF	enzyme binding	27/237	444/6996	0.00207607	0.153214	0.145543	HRC/SRI/HDAC2/DUSP3/FAM83A/MIF/MET/DERL3/KPNB1/MAP1LC3A/PPP3CB/CHL1/ABL1/JUP/FZD5/SOCS5/LAMP2/ARPP19/DCUN1D4/DUSP5/STUB1/NFKBIA/PTPN11/XPO7/TIMP1/DPP4/MAP3K7	27
GO:0046914	MF	transition metal ion binding	27/237	458/6996	0.00321725	0.159484	0.1515	VAT1/GLO1/VAT1L/TRIM14/PPARD/UBR7/OGFOD2/EGLN2/ADAMTS20/MTA2/CA5B/PRICKLE2/LOX/IKZF5/RCHY1/BLVRA/ABL1/IMPA1/SMPDL3A/RNF4/MORC3/SNRPC/HLTF/FBXO11/BHMT/SUV39H2/NPEPL1	27
GO:0051015	MF	actin filament binding	7/237	58/6996	0.00322937	0.159484	0.1515	ARPC5/NEBL/ABL1/CORO2A/TMEM201/PLS3/CTNNA1	7
GO:0008270	MF	zinc ion binding	21/237	327/6996	0.00345766	0.159484	0.1515	VAT1/GLO1/VAT1L/TRIM14/PPARD/UBR7/ADAMTS20/MTA2/CA5B/PRICKLE2/IKZF5/RCHY1/BLVRA/SMPDL3A/RNF4/MORC3/SNRPC/HLTF/FBXO11/BHMT/SUV39H2	21
GO:1990782	MF	protein tyrosine kinase binding	4/237	20/6996	0.00405471	0.166243	0.15792	DUSP3/SOCS5/PTPN11/MAP3K7	4
GO:0019904	MF	protein domain specific binding	11/237	133/6996	0.00529691	0.175478	0.166693	RHOQ/KEAP1/QKI/ADAM15/IKZF5/ABL1/RBM39/TCEAL8/HMGB2/LAMP2/STUB1	11
GO:0000217	MF	DNA secondary structure binding	3/237	12/6996	0.00673127	0.175478	0.166693	ABL1/HMGB2/RBBP8	3
GO:0140142	MF	nucleocytoplasmic carrier activity	3/237	12/6996	0.00673127	0.175478	0.166693	KPNA3/KPNB1/XPO7	3
GO:0016811	MF	hydrolase activity, acting on carbon-nitrogen (but not peptide) bonds, in linear amides	5/237	36/6996	0.0068344	0.175478	0.166693	HDAC2/NTAN1/HDAC1/DEDD/NIT2	5
GO:0044877	MF	protein-containing complex binding	19/237	303/6996	0.00686858	0.175478	0.166693	IGF1R/PEX6/DERL3/ADAM15/ARPC5/NEBL/LOX/ABL1/FZD5/CORO2A/SEC61A2/LUM/TMEM201/HMBOX1/SUPT16H/PTPN11/PLS3/CTNNA1/NRAS	19
GO:0004713	MF	protein tyrosine kinase activity	6/237	51/6996	0.00713324	0.175478	0.166693	IGF1R/SLA/MET/ABL1/CLK1/DYRK1A	6
GO:1901682	MF	sulfur compound transmembrane transporter activity	3/237	15/6996	0.0129159	0.28431	0.270076	SLC6A6/SLC35B2/SLC26A4	3
GO:0106306	MF	protein serine phosphatase activity	4/237	28/6996	0.0138688	0.28431	0.270076	DUSP3/PPP3CB/DUSP4/DUSP5	4
GO:0106307	MF	protein threonine phosphatase activity	4/237	28/6996	0.0138688	0.28431	0.270076	DUSP3/PPP3CB/DUSP4/DUSP5	4
GO:0050839	MF	cell adhesion molecule binding	6/237	62/6996	0.0179163	0.322714	0.306557	PTK7/ADAM15/CHL1/JUP/PTPN11/CTNNA1	6
GO:0008092	MF	cytoskeletal protein binding	17/237	288/6996	0.0179315	0.322714	0.306557	CNN1/CALD1/DUSP3/KIFC1/ARPC5/MARCKSL1/MAP1LC3A/MSN/NEBL/ABL1/DYRK1A/CORO2A/CAP1/TMEM201/NF2/PLS3/CTNNA1	17
GO:0045296	MF	cadherin binding	3/237	17/6996	0.0183658	0.322714	0.306557	JUP/PTPN11/CTNNA1	3
GO:0016831	MF	carboxy-lyase activity	3/237	18/6996	0.0214988	0.326937	0.31057	UROD/HDC/AMD1	3
GO:0030145	MF	manganese ion binding	3/237	18/6996	0.0214988	0.326937	0.31057	ABL1/IMPA1/NPEPL1	3
GO:0008022	MF	protein C-terminus binding	4/237	32/6996	0.0219304	0.326937	0.31057	PEX6/KPNA3/ABL1/SDCBP2	4
GO:0016810	MF	hydrolase activity, acting on carbon-nitrogen (but not peptide) bonds	6/237	65/6996	0.0221502	0.326937	0.31057	HDAC2/NTAN1/HDAC1/DEDD/MTHFD1/NIT2	6
GO:0004722	MF	protein serine/threonine phosphatase activity	4/237	34/6996	0.0268419	0.36684	0.348474	DUSP3/PPP3CB/DUSP4/DUSP5	4
GO:0019903	MF	protein phosphatase binding	4/237	34/6996	0.0268419	0.36684	0.348474	MET/PPP3CB/JUP/ARPP19	4
GO:0017124	MF	SH3 domain binding	3/237	20/6996	0.0285848	0.376707	0.357847	QKI/ADAM15/ABL1	3
GO:0051213	MF	dioxygenase activity	4/237	36/6996	0.0323612	0.395859	0.37604	OGFOD2/EGLN2/ALKBH6/IDO1	4
GO:0008138	MF	protein tyrosine/serine/threonine phosphatase activity	3/237	21/6996	0.032536	0.395859	0.37604	DUSP3/DUSP4/DUSP5	3
GO:0042578	MF	phosphoric ester hydrolase activity	10/237	152/6996	0.0332564	0.395859	0.37604	DUSP3/INPP5A/LHPP/PPP3CB/CNP/IMPA1/SMPDL3A/DUSP4/DUSP5/PTPN11	10
GO:0004715	MF	non-membrane spanning protein tyrosine kinase activity	3/237	23/6996	0.0412435	0.466496	0.443141	SLA/ABL1/DYRK1A	3
GO:0051787	MF	misfolded protein binding	2/237	10/6996	0.0429834	0.466496	0.443141	DERL3/STUB1	2
GO:0061608	MF	nuclear import signal receptor activity	2/237	10/6996	0.0429834	0.466496	0.443141	KPNA3/KPNB1	2
GO:0016830	MF	carbon-carbon lyase activity	3/237	24/6996	0.0459928	0.468335	0.444888	UROD/HDC/AMD1	3
GO:0019902	MF	phosphatase binding	4/237	41/6996	0.0488652	0.468335	0.444888	MET/PPP3CB/JUP/ARPP19	4

## Sheet: S5
Table S5: KEGG pathway enrichment of differentially expressed genes
ID	Description	GeneRatio	BgRatio	pvalue	p.adjust	qvalue	geneID	Count
KEGG pathway
ssc04115	p53 signaling pathway	8/223	73/8871	0.000463389	0.0586459	0.052253	780426/100526065/100038006/100153541/100157205/100155836/100125959/100505408	8
ssc05220	Chronic myeloid leukemia	8/223	75/8871	0.000557126	0.0586459	0.052253	100156170/100622482/100524544/100125959/406188/100170851/397340/100739349	8
ssc05205	Proteoglycans in cancer	14/223	206/8871	0.000678836	0.0586459	0.052253	100155015/397350/100126276/654328/494458/780428/100519058/100621398/100152607/100125959/100170851/100626716/100524961/100739349	14
ssc04140	Autophagy - animal	11/223	142/8871	0.00087859	0.0586459	0.052253	397350/100462758/100525780/100511396/100622795/100322893/100621398/100154598/100505408/100135663/100739349	11
ssc00532	Glycosaminoglycan biosynthesis - chondroitin sulfate / dermatan sulfate	4/223	20/8871	0.00137184	0.073256	0.0652705	100625171/100316855/100524793/397642	4
ssc00280	leucine and isoleucine degradation	6/223	52/8871	0.0018283	0.0813595	0.0724907	100626793/396841/397604/100142666/100154810/100142669	6
ssc05203	Viral carcinogenesis	12/223	192/8871	0.00327231	0.124815	0.111209	100624088/780426/397651/100156170/100622482/780428/780415/100125959/406188/100190899/397340/100739349	12
ssc04625	C-type lectin receptor signaling pathway	8/223	105/8871	0.00484591	0.161732	0.144102	100155015/396603/780415/100621398/100125959/406188/100170851/100739349	8
ssc05010	Alzheimer disease	18/223	384/8871	0.00802202	0.23163	0.20638	100155015/100154130/397651/100462758/100126276/100525780/100522775/100621969/396603/100519058/733583/100522783/100513895/100157157/100514516/100519163/414412/100739349	18
ssc04520	Adherens junction	6/223	71/8871	0.00867527	0.23163	0.20638	397350/654328/100153151/780428/100523778/100135663	6
ssc05162	Measles	9/223	146/8871	0.011259	0.243527	0.216981	780426/396661/494458/100038006/780415/100513057/406188/397340/100135663	9
ssc05208	Chemical carcinogenesis - reactive oxygen species	12/223	227/8871	0.012001	0.243527	0.216981	100154130/397651/100136900/654328/100522775/100524544/100522783/100513895/406188/100170851/414412/100739349	12
ssc00860	Porphyrin metabolism	4/223	36/8871	0.0121928	0.243527	0.216981	100524598/100514239/100511474/100515289	4
ssc01212	Fatty acid metabolism	5/223	57/8871	0.0139167	0.243527	0.216981	100626793/397604/100154810/399527/100511670	5
ssc04010	MAPK signaling pathway	14/223	289/8871	0.0142064	0.243527	0.216981	397350/100512983/654328/396603/100523919/397281/780428/100514115/100621398/493184/100514374/100157144/100135663/100739349	14
ssc05022	Pathways of neurodegeneration - multiple diseases	20/223	474/8871	0.0158566	0.243527	0.216981	100155015/100154130/407060/397651/100462758/100126276/100525780/100522775/100621969/100322893/396603/100519058/733583/100522783/100626802/100513895/100157157/100514516/414412/100739349	20
ssc05169	Epstein-Barr virus infection	11/223	209/8871	0.0163207	0.243527	0.216981	780426/100156170/100622482/396661/780415/733583/100516719/100125959/406188/100190899/100135663	11
ssc04360	Axon guidance	10/223	182/8871	0.0164466	0.243527	0.216981	102167373/654328/100517310/100521592/396603/100524544/780428/100624508/100170851/100739349	10
ssc05202	Transcriptional misregulation in cancer	10/223	185/8871	0.018234	0.243527	0.216981	397350/100515962/100156170/100622482/100737376/654328/397592/100517879/100511336/100125959	10
ssc05165	Human papillomavirus infection	15/223	328/8871	0.0183066	0.243527	0.216981	102161832/780426/100621911/100156170/100126276/100622482/780428/100519058/780415/100037284/100125959/100505408/100626716/100514516/100739349	15
ssc03060	Protein export	3/223	23/8871	0.0191538	0.243527	0.216981	407060/100524270/100511831	3
ssc05014	Amyotrophic lateral sclerosis	16/223	364/8871	0.0210748	0.255741	0.227863	100155015/100154130/407060/100462758/100154567/100525780/100522775/100621969/100322893/396603/733583/100522783/100626802/100513895/100157157/414412	16
ssc00071	Fatty acid degradation	4/223	43/8871	0.022304	0.255741	0.227863	100626793/397604/100154810/399527	4
ssc05016	Huntington disease	14/223	308/8871	0.0233052	0.255741	0.227863	100154130/397651/100462758/100156170/100622482/100525780/100522775/100621969/100155804/733583/100522783/100513895/100157157/414412	14
ssc05221	Acute myeloid leukemia	5/223	66/8871	0.0248061	0.255741	0.227863	397297/397592/100621339/397340/100739349	5
ssc04141	Protein processing in endoplasmic reticulum	9/223	167/8871	0.0249036	0.255741	0.227863	407060/100524148/396938/100155947/100511831/100621165/100626802/100511251/100516870	9
ssc01240	Biosynthesis of cofactors	8/223	143/8871	0.02763	0.265119	0.236219	100514239/396841/414382/100511474/100157319/100516661/100620859/100519877	8
ssc05211	Renal cell carcinoma	5/223	68/8871	0.0278028	0.265119	0.236219	100523673/654328/780428/100170851/100739349	5
ssc05218	Melanoma	5/223	69/8871	0.0293837	0.270532	0.241042	397350/654328/397281/100125959/100739349	5
ssc05017	Spinocerebellar ataxia	8/223	146/8871	0.0307578	0.273745	0.243904	100155015/397651/100462758/100037307/100525780/100523902/100621969/733583	8
ssc04137	Mitophagy - animal	5/223	71/8871	0.0327131	0.281754	0.251041	100622795/100322893/100621398/100037982/100739349	5
ssc05226	Gastric cancer	8/223	149/8871	0.034121	0.284697	0.253663	100126276/654328/397592/397281/100519058/100514516/100523778/100739349	8
ssc03010	Ribosome	8/223	151/8871	0.0364972	0.28736	0.256035	397047/100520891/100155549/100737826/396989/414392/100521262/397598	8
ssc04110	Cell cycle	7/223	124/8871	0.0365927	0.28736	0.256035	780426/100156170/100622482/100520746/100524544/100125959/100515014	7
ssc05012	Parkinson disease	12/223	268/8871	0.0378378	0.288648	0.257183	100155015/100154130/407060/397651/100136900/100522775/100621969/733583/100522783/100513895/100157157/414412	12
ssc04218	Cellular senescence	8/223	154/8871	0.0402671	0.298648	0.266093	100155015/780426/397651/396603/100621398/100125959/100505408/100739349	8
ssc05020	Prion disease	12/223	273/8871	0.0425956	0.30065	0.267877	100155015/100154130/407060/397651/100522775/100621969/396603/733583/100522783/100513895/100157157/414412	12
ssc05100	Bacterial invasion of epithelial cells	5/223	77/8871	0.0440713	0.30065	0.267877	654328/100154585/100174965/780428/100523778	5
ssc00640	Propanoate metabolism	3/223	32/8871	0.045532	0.30065	0.267877	100512509/100142666/100142669	3
ssc01521	EGFR tyrosine kinase inhibitor resistance	5/223	78/8871	0.0461672	0.30065	0.267877	397350/654328/100514115/100519331/100739349	5
ssc03320	PPAR signaling pathway	5/223	78/8871	0.0461672	0.30065	0.267877	397297/100153151/100126283/397628/399527	5

## Sheet: S6
Table S6: The GSEA of DEGs in GO and KEGG between high- and low-level expression genes.
ID	Description	setSize	enrichmentScore	NES	pvalue	p.adjust	qvalues	rank	leading_edge	core_enrichment
GSEA_go_MF
GO:0005125	cytokine activity	89	-0.498704	-1.82712	7.6e-05	0.031404	0.0305756	1419	tags=27%, list=14%, signal=23%		100155754/100511484/100153724/100310829/397122/397400/397053/100152899/100125969/100513655/100155581/100512974/100157103/414285/397249/100516016/100520560/100327037/595123/396862/100628202/100135681/554303/100512949
GO:0030545	signaling receptor regulator activity	157	-0.389603	-1.56753	0.000428186	0.048905	0.0476149	1355	tags=20%, list=13%, signal=18%		100511484/100153724/100310829/397122/397400/397053/100152899/100125969/100513655/100155581/100512974/494469/100101476/100157103/396717/414285/397249/100518887/100516016/100520560/100327037/595123/100511850/397496/100152223/397153/396862/396832/100628202/100135681/554303/100512949
GO:0030546	signaling receptor activator activity	154	-0.393615	-1.57827	0.000473656	0.048905	0.0476149	1355	tags=21%, list=13%, signal=18%		100511484/100153724/100310829/397122/397400/397053/100152899/100125969/100513655/100155581/100512974/494469/100101476/100157103/396717/414285/397249/100518887/100516016/100520560/100327037/595123/100511850/397496/100152223/397153/396862/396832/100628202/100135681/554303/100512949
GO:0048018	receptor ligand activity	154	-0.393615	-1.57827	0.000473656	0.048905	0.0476149	1355	tags=21%, list=13%, signal=18%		100511484/100153724/100310829/397122/397400/397053/100152899/100125969/100513655/100155581/100512974/494469/100101476/100157103/396717/414285/397249/100518887/100516016/100520560/100327037/595123/100511850/397496/100152223/397153/396862/396832/100628202/100135681/554303/100512949
GSEA_KEGG
ssc00280	Valine, leucine and isoleucine degradation	39	0.65006	1.79575	0.000417304	0.000417304	0.0866426	1762	tags=51%, list=17%, signal=43%	100142666/397604/397012/100142669/100626793/100156927/396841/100518224/100154810/100158147/100156047/100153301/100524223/100156530/100153809/100312959/100739500/100523701/100627341/448846
ssc00640	Propanoate metabolism	26	0.711861	1.82124	0.000577617	0.000577617	0.0866426	1337	tags=50%, list=13%, signal=44%	397324/100142666/397012/100142669/100621540/102161427/100156927/100512509/100523005/100158147/100153301/100502559/100156530
ssc04922	Glucagon signaling pathway	76	0.513497	1.5775	0.00258198	0.00258198	0.258198	1731	tags=30%, list=17%, signal=25%	100155015/397324/100142689/397149/100286877/100621540/102161427/397595/100127478/100515868/100145903/397241/397394/100621536/100502559/396603/100627903/100513811/100157793/397239/397652/397674/397504
ssc05031	Amphetamine addiction	43	0.585712	1.64817	0.00344495	0.00344495	0.258371	1701	tags=33%, list=16%, signal=27%	100142689/100521797/100736966/100156170/397378/100622482/397241/397394/414424/733612/396603/100627903/397652/397674
ssc03010	Ribosome	93	0.48764	1.53846	0.00439754	0.00439754	0.263852	1672	tags=33%, list=16%, signal=28%	397047/396989/100737826/110255317/397598/100512647/100520891/414398/100521315/100512482/396977/100624982/100521262/100514796/100517165/396993/100038023/100517840/100622852/100511022/100518988/100517705/100519932/100624945/100516385/100518410/100156324/110257174/100739774/100513028/414397
ssc00830	Retinol metabolism	22	0.666021	1.64275	0.00528324	0.00528324	0.264162	2005	tags=41%, list=19%, signal=33%	100519138/403111/100513555/100514967/100157319/100151799/100517586/100523701/100517137
ssc00670	One carbon pool by folate	15	0.719058	1.62808	0.00675169	0.00675169	0.268817	982	tags=27%, list=9%, signal=24%	100626911/414382/397180/100622210
ssc05020	Prion disease	168	0.415822	1.40385	0.00716846	0.00716846	0.268817	1893	tags=32%, list=18%, signal=26%	100155015/100154130/407060/100142689/100515564/100522775/100156967/100515069/100513030/100621969/100521797/100513895/100156790/100154443/100312976/414412/100516779/100523278/733594/100038022/397651/100516606/100517435/100038031/100622110/100514033/100157157/100515483/100522783/396856/397241/100579141/100739619/100737726/780433/448979/396603/100037951/100627903/100157442/414437/397652/100739510/10…
ssc05211	Renal cell carcinoma	45	0.547365	1.55336	0.00946243	0.00946243	0.273697	2440	tags=38%, list=24%, signal=29%	780428/654328/100511026/100739349/100523673/100127478/100170851/100511837/100513811/100153461/100739510/110259208/100192436/100525766/100623707/396653/100739306
ssc05100	Bacterial invasion of epithelial cells	43	0.554835	1.56128	0.00978366	0.00978366	0.273697	189	tags=21%, list=2%, signal=21%	780428/100174965/654328/100736650/100523778/100155875/100511026/397620/100526147
ssc04931	Insulin resistance	86	0.474827	1.48467	0.0100356	0.0100356	0.273697	2274	tags=37%, list=22%, signal=29%	100142689/397149/100157568/406188/100127478/100515868/100525290/733702/100170851/100524932/397378/100127158/100145903/100518588/733648/100621536/733612/396754/100518810/100522174/100513811/397209/100157793/397239/100739510/397504/100523015/733659/100512070/100623707/100519270/100135665
ssc04660	T cell receptor signaling pathway	76	0.482435	1.48208	0.0118771	0.0118771	0.279699	2274	tags=36%, list=22%, signal=28%	780428/100739349/100157729/406188/100127478/100135663/396661/397286/397241/100192438/100125346/396603/100144492/100511837/100627903/100513811/397225/396636/100739510/100153830/110259208/100192436/100525766/100151931/100622217/100623707/100135665
ssc00532	Glycosaminoglycan biosynthesis - chondroitin sulfate / dermatan sulfate	16	0.693504	1.59223	0.0121203	0.0121203	0.279699	1669	tags=38%, list=16%, signal=31%	100316855/100625171/397642/100524793/100738738/100151968
ssc00190	Oxidative phosphorylation	79	0.471603	1.45875	0.0156868	0.0156868	0.336145	1589	tags=37%, list=15%, signal=31%	100154130/100156052/100522775/100156967/100515069/100513030/100513895/100154443/100312976/414412/100038022/100516606/100038031/100622110/445531/100514033/100156112/100522783/100154942/100579141/100739619/100156681/100737726/780433/448979/100518959/106504095/100157442/733646
ssc04520	Adherens junction	47	0.525318	1.50195	0.0176799	0.0176799	0.353597	1020	tags=23%, list=10%, signal=21%	780428/102162332/654328/100170126/100523778/100153151/100155782/100517435/100516641/100135663/100513914
ssc04370	VEGF signaling pathway	34	0.567364	1.53018	0.0188759	0.0188759	0.353923	1845	tags=38%, list=18%, signal=32%	780428/100739349/100127478/397241/100520687/493184/396603/100627903/100513811/100519210/102162529/100739510/110259208
ssc04371	Apelin signaling pathway	89	0.445925	1.40044	0.0264984	0.0264984	0.4123	1890	tags=28%, list=18%, signal=23%	100155015/397149/397458/100739349/102158881/100127478/100515868/100524932/100127158/100145903/100038023/396856/100322893/100522824/100515992/100621398/100513811/100157793/100519210/100037273/397652/397504/100516558/110259208/100512852
ssc04921	Oxytocin signaling pathway	96	0.436684	1.38454	0.0272568	0.0272568	0.4123	1854	tags=26%, list=18%, signal=22%	100155015/397149/100626700/100739349/100515868/397378/100145903/100523919/396585/396856/397241/397394/100520687/100524021/733612/396603/100627903/100157793/397652/102162529/397674/397504/106504229/110259208/100524101
ssc04726	Serotonergic synapse	63	0.477228	1.42916	0.0275217	0.0275217	0.4123	1845	tags=21%, list=18%, signal=17%	100155015/403111/397687/100739349/397663/100623822/100511002/100520687/414424/100515992/397652/102162529/110259208
ssc05030	Cocaine addiction	25	0.588911	1.49369	0.0285135	0.0285135	0.4123	2274	tags=32%, list=22%, signal=25%	100142689/100521797/100736966/100626077/414424/397652/733700/100135665
ssc05144	Malaria	35	-0.476888	-1.47368	0.0289098	0.0289098	0.4123	1340	tags=26%, list=13%, signal=22%	397122/397400/397053/100623585/407066/396623/399541/397508/396941
ssc04625	C-type lectin receptor signaling pathway	68	0.466169	1.40928	0.0302353	0.0302353	0.4123	2274	tags=37%, list=22%, signal=29%	100155015/100739349/100623580/406188/100127478/100170851/396655/397241/780415/397319/100125959/100621398/100125346/396603/100627903/100513811/100739510/100153830/100516558/110259208/100519508/100525766/100038004/100623707/100135665
ssc04940	Type I diabetes mellitus	20	-0.563402	-1.53981	0.0350769	0.0350769	0.454407	1620	tags=35%, list=16%, signal=30%	100153387/100135037/492279/397122/397053/445528/100135036
ssc00650	Butanoate metabolism	19	0.612925	1.46036	0.0444145	0.0444145	0.454407	1779	tags=37%, list=17%, signal=31%	397604/397012/100626793/100156927/100524223/448846/100157072
ssc04714	Thermogenesis	147	0.388713	1.29453	0.0457224	0.0457224	0.454407	1317	tags=24%, list=13%, signal=22%	100154130/100142689/397149/100522775/100156967/100515069/100513030/100739349/100513895/397595/100154443/100312976/100515868/414412/100522126/100038022/100516606/100525825/100038031/100127158/100622110/100514033/396844/100145903/100038023/102167672/100522783/100579141/100739619/100127157/100505408/100737726/780433/448979/100522174/100233193
ssc00380	Tryptophan metabolism	24	0.572543	1.441	0.0460536	0.0460536	0.454407	1762	tags=46%, list=17%, signal=38%	397604/397012/100626793/100156927/397690/100511002/100625479/414424/100153809/100523701/448846
ssc05208	Chemical carcinogenesis - reactive oxygen species	138	0.392338	1.29747	0.0462731	0.0462731	0.454407	1501	tags=25%, list=15%, signal=21%	100154130/654328/100522775/100156967/100515069/100513030/100739349/100136900/100513895/406188/100154443/100312976/100127478/414412/100524544/100170851/397639/100038022/397651/100516606/100038031/100622110/100514033/100522783/100579141/100739619/100625479/100737726/780433/448979/100286873/100513811/100157442/654406
ssc01521	EGFR tyrosine kinase inhibitor resistance	53	0.475168	1.38502	0.0478061	0.0478061	0.454407	2926	tags=49%, list=28%, signal=35%	654328/100511026/100526147/100739349/100127478/100519331/100516641/100127158/100514115/100038023/100038030/397491/733648/100513811/100739510/100525045/110259208/100192436/100623707/397083/100126852/396633/100526136/397070/100156602/397202
ssc04012	ErbB signaling pathway	54	0.47228	1.38048	0.0478888	0.0478888	0.454407	1979	tags=35%, list=19%, signal=29%	100511026/100526147/100739349/100127478/100524544/397340/100516641/100127158/397394/100192438/100516621/100511837/100513811/100739510/397674/100525045/110259208/100192436/100525766
ssc05410	Hypertrophic cardiomyopathy	57	0.467306	1.37855	0.0483461	0.0483461	0.454407	2377	tags=39%, list=23%, signal=30%	397149/100154420/100049696/100515868/100037284/100158200/100623668/100145903/100523919/396585/396856/397491/397483/100524021/100157793/100512142/397504/100524101/397019/100516962/396860/396915
ssc00860	Porphyrin metabolism	16	0.629547	1.44539	0.0492294	0.0492294	0.454407	923	tags=38%, list=9%, signal=34%	100524598/100322873/100157459/100515289/100514239/100511474

## Sheet: S7
Table S7: The enrichment analysis of hub genes
ID	terms	All Associated Genes	Nr. Genes	Term PValue	Term PValue Corrected with Bonferroni step down
Hub-gene KEGG
KEGG:05220	Chronic myeloid leukemia	[ABL1, HDAC1, HDAC2, MDM2]	4	3.27e-08	7.85e-07
KEGG:04330	Notch signaling pathway	[HDAC1, HDAC2]	2	0.000238	0.000475
Hub-gene GO_BP
GO:1900026	positive regulation of substrate adhesion-dependent cell spreading	[ABL1, CDC42]	2	6.63e-05	0.00073
GO:1900024	regulation of substrate adhesion-dependent cell spreading	[ABL1, CDC42]	2	0.000139	0.000833
GO:0099563	modification of synaptic structure	[ABL1, CDC42]	2	1.22e-05	0.000256
GO:0070933	histone H4 deacetylation	[HDAC1, HDAC2]	2	1.22e-05	0.000256
GO:0070932	histone H3 deacetylation	[HDAC1, HDAC2]	2	3.39e-05	0.000508
GO:0043124	negative regulation of I-kappaB kinase/NF-kappaB signaling	[ABL1, HDAC1]	2	0.000163	0.000653
GO:0032800	receptor biosynthetic process	[HDAC1, HDAC2]	2	0.000218	0.000653
GO:0032488	Cdc42 protein signal transduction	[ABL1, CDC42]	2	1.22e-05	0.000256
GO:0010870	positive regulation of receptor biosynthetic process	[HDAC1, HDAC2]	2	6.22e-06	0.000143
GO:0010869	regulation of receptor biosynthetic process	[HDAC1, HDAC2]	2	2.66e-05	0.000452
GO:0001954	positive regulation of cell-matrix adhesion	[ABL1, JUP]	2	0.000116	0.000815
Hub-gene GO_MF
GO:0051059	NF-kappaB binding	[HDAC1, HDAC2]	2	4.65e-05	0.000604
GO:0034979	NAD-dependent protein deacetylase activity	[HDAC1, HDAC2]	2	3.01e-05	0.000482
GO:0033558	protein deacetylase activity	[HDAC1, HDAC2]	2	8.35e-05	0.000752
GO:0032041	NAD-dependent histone deacetylase activity (H3-K14 specific)	[HDAC1, HDAC2]	2	9.99e-06	0.00022
GO:0031078	histone deacetylase activity (H3-K14 specific)	[HDAC1, HDAC2]	2	9.99e-06	0.00022
GO:0019213	deacetylase activity	[HDAC1, HDAC2]	2	0.000155	0.000774
GO:0017136	NAD-dependent histone deacetylase activity	[HDAC1, HDAC2]	2	2.33e-05	0.000419
GO:0004407	histone deacetylase activity	[HDAC1, HDAC2]	2	7.18e-05	0.000718
GO:0001103	RNA polymerase II repressing transcription factor binding	[HDAC1, HDAC2]	2	8.97e-05	0.000717
Hub-gene GO_CC
GO:0090568	nuclear transcriptional repressor complex	[HDAC1, HDAC2]	2	5.6e-05	0.000672
GO:0090545	CHD-type complex	[HDAC1, HDAC2]	2	1.73e-05	0.000346
GO:0070822	Sin3-type complex	[HDAC1, HDAC2]	2	2.02e-05	0.000383
GO:0016581	NuRD complex	[HDAC1, HDAC2]	2	1.73e-05	0.000346
GO:0016580	Sin3 complex	[HDAC1, HDAC2]	2	9.99e-06	0.00022
GO:0005763	mitochondrial small ribosomal subunit	[MRPS10, MRPS5]	2	4.21e-05	0.000589
GO:0000314	organellar small ribosomal subunit	[MRPS10, MRPS5]	2	4.21e-05	0.000589
GO:0000118	histone deacetylase complex	[HDAC1, HDAC2]	2	0.000258	0.000258

## Sheet: S8
Table S8: The GSEA of the four potential biomarkers.
HDAC1
ID	Description	setSize	enrichmentScore	NES	pvalue	p.adjust	qvalues	rank	leading_edge	core_enrichment
ssc00640	Propanoate metabolism	26	0.711861	1.82141	0.000290023	0.000290023	0.0841404	1337	tags=50%, list=13%, signal=44%	397324/100142666/397012/100142669/100621540/102161427/100156927/100512509/100523005/100158147/100153301/100502559/100156530
ssc00280	Valine, leucine and isoleucine degradation	39	0.65006	1.79622	0.000555093	0.000555093	0.0841404	1762	tags=51%, list=17%, signal=43%	100142666/397604/397012/100142669/100626793/100156927/396841/100518224/100154810/100158147/100156047/100153301/100524223/100156530/100153809/100312959/100739500/100523701/100627341/448846
ssc04922	Glucagon signaling pathway	76	0.513497	1.57885	0.00281474	0.00281474	0.241831	1731	tags=30%, list=17%, signal=25%	100155015/397324/100142689/397149/100286877/100621540/102161427/397595/100127478/100515868/100145903/397241/397394/100621536/100502559/396603/100627903/100513811/100157793/397239/397652/397674/397504
ssc05031	Amphetamine addiction	43	0.585712	1.6464	0.0038451	0.0038451	0.241831	1701	tags=33%, list=16%, signal=27%	100142689/100521797/100736966/100156170/397378/100622482/397241/397394/414424/733612/396603/100627903/397652/397674
ssc03010	Ribosome	93	0.48764	1.53913	0.00398853	0.00398853	0.241831	1672	tags=33%, list=16%, signal=28%	397047/396989/100737826/110255317/397598/100512647/100520891/414398/100521315/100512482/396977/100624982/100521262/100514796/100517165/396993/100038023/100517840/100622852/100511022/100518988/100517705/100519932/100624945/100516385/100518410/100156324/110257174/100739774/100513028/414397
ssc00650	Butanoate metabolism	18	0.701677	1.66037	0.00629308	0.00629308	0.251916	1779	tags=39%, list=17%, signal=32%	397604/397012/100626793/100156927/100524223/448846/100157072
ssc00830	Retinol metabolism	22	0.666021	1.64746	0.00675676	0.00675676	0.251916	2005	tags=41%, list=19%, signal=33%	100519138/403111/100513555/100514967/100157319/100151799/100517586/100523701/100517137
ssc05100	Bacterial invasion of epithelial cells	43	0.554835	1.5596	0.00906344	0.00906344	0.251916	189	tags=21%, list=2%, signal=21%	780428/100174965/654328/100736650/100523778/100155875/100511026/397620/100526147
ssc04931	Insulin resistance	86	0.474827	1.48344	0.00906459	0.00906459	0.251916	2274	tags=37%, list=22%, signal=29%	100142689/397149/100157568/406188/100127478/100515868/100525290/733702/100170851/100524932/397378/100127158/100145903/100518588/733648/100621536/733612/396754/100518810/100522174/100513811/397209/100157793/397239/100739510/397504/100523015/733659/100512070/100623707/100519270/100135665
ssc05211	Renal cell carcinoma	45	0.547365	1.5528	0.00940952	0.00940952	0.251916	2440	tags=38%, list=24%, signal=29%	780428/654328/100511026/100739349/100523673/100127478/100170851/100511837/100513811/100153461/100739510/110259208/100192436/100525766/100623707/396653/100739306
ssc04660	T cell receptor signaling pathway	76	0.482435	1.48334	0.0095957	0.0095957	0.251916	2274	tags=36%, list=22%, signal=28%	780428/100739349/100157729/406188/100127478/100135663/396661/397286/397241/100192438/100125346/396603/100144492/100511837/100627903/100513811/397225/396636/100739510/100153830/110259208/100192436/100525766/100151931/100622217/100623707/100135665
ssc00670	One carbon pool by folate	15	0.719058	1.63304	0.01017	0.01017	0.251916	982	tags=27%, list=9%, signal=24%	100626911/414382/397180/100622210
ssc05020	Prion disease	168	0.415822	1.39869	0.0108026	0.0108026	0.251916	1893	tags=32%, list=18%, signal=26%	100155015/100154130/407060/100142689/100515564/100522775/100156967/100515069/100513030/100621969/100521797/100513895/100156790/100154443/100312976/414412/100516779/100523278/733594/100038022/397651/100516606/100517435/100038031/100622110/100514033/100157157/100515483/100522783/396856/397241/100579141/100739619/100737726/780433/448979/396603/100037951/100627903/100157442/414437/397652/100739510/10…
ssc00532	Glycosaminoglycan biosynthesis - chondroitin sulfate / dermatan sulfate	16	0.693504	1.59691	0.0128749	0.0128749	0.278795	1669	tags=38%, list=16%, signal=31%	100316855/100625171/397642/100524793/100738738/100151968
ssc00190	Oxidative phosphorylation	79	0.471603	1.457	0.0142693	0.0142693	0.288391	1589	tags=37%, list=15%, signal=31%	100154130/100156052/100522775/100156967/100515069/100513030/100513895/100154443/100312976/414412/100038022/100516606/100038031/100622110/445531/100514033/100156112/100522783/100154942/100579141/100739619/100156681/100737726/780433/448979/100518959/106504095/100157442/733646
ssc04520	Adherens junction	47	0.525318	1.50415	0.0154033	0.0154033	0.291852	1020	tags=23%, list=10%, signal=21%	780428/102162332/654328/100170126/100523778/100153151/100155782/100517435/100516641/100135663/100513914
ssc04370	VEGF signaling pathway	34	0.567364	1.52971	0.0177991	0.0177991	0.317409	1845	tags=38%, list=18%, signal=32%	780428/100739349/100127478/397241/100520687/493184/396603/100627903/100513811/100519210/102162529/100739510/110259208
ssc04371	Apelin signaling pathway	89	0.445925	1.39881	0.0242676	0.0242676	0.4019	1890	tags=28%, list=18%, signal=23%	100155015/397149/397458/100739349/102158881/100127478/100515868/100524932/100127158/100145903/100038023/396856/100322893/100522824/100515992/100621398/100513811/100157793/100519210/100037273/397652/397504/100516558/110259208/100512852
ssc04726	Serotonergic synapse	63	0.477228	1.42973	0.0262917	0.0262917	0.4019	1845	tags=21%, list=18%, signal=17%	100155015/403111/397687/100739349/397663/100623822/100511002/100520687/414424/100515992/397652/102162529/110259208
ssc04625	C-type lectin receptor signaling pathway	68	0.466169	1.41344	0.02763	0.02763	0.4019	2274	tags=37%, list=22%, signal=29%	100155015/100739349/100623580/406188/100127478/100170851/396655/397241/780415/397319/100125959/100621398/100125346/396603/100627903/100513811/100739510/100153830/100516558/110259208/100519508/100525766/100038004/100623707/100135665
ssc04921	Oxytocin signaling pathway	96	0.436684	1.38409	0.0278399	0.0278399	0.4019	1854	tags=26%, list=18%, signal=22%	100155015/397149/100626700/100739349/100515868/397378/100145903/100523919/396585/396856/397241/397394/100520687/100524021/733612/396603/100627903/100157793/397652/102162529/397674/397504/106504229/110259208/100524101
ssc05144	Malaria	35	-0.476888	-1.47536	0.0294118	0.0294118	0.405291	1340	tags=26%, list=13%, signal=22%	397122/397400/397053/100623585/407066/396623/399541/397508/396941
ssc05030	Cocaine addiction	25	0.588911	1.49313	0.031797	0.031797	0.419109	2274	tags=32%, list=22%, signal=25%	100142689/100521797/100736966/100626077/414424/397652/733700/100135665
ssc04940	Type I diabetes mellitus	20	-0.563401	-1.52602	0.0353086	0.0353086	0.446003	1620	tags=35%, list=16%, signal=30%	100153387/100135037/492279/397122/397053/445528/100135036
ssc05208	Chemical carcinogenesis - reactive oxygen species	138	0.392338	1.29863	0.0492213	0.0492213	0.465311	1501	tags=25%, list=15%, signal=21%	100154130/654328/100522775/100156967/100515069/100513030/100739349/100136900/100513895/406188/100154443/100312976/100127478/414412/100524544/100170851/397639/100038022/397651/100516606/100038031/100622110/100514033/100522783/100579141/100739619/100625479/100737726/780433/448979/100286873/100513811/100157442/654406
ssc00860	Porphyrin metabolism	16	0.629547	1.44963	0.0496819	0.0496819	0.465311	923	tags=38%, list=9%, signal=34%	100524598/100322873/100157459/100515289/100514239/100511474
ssc00380	Tryptophan metabolism	24	0.572543	1.44081	0.0497592	0.0497592	0.465311	1762	tags=46%, list=17%, signal=38%	397604/397012/100626793/100156927/397690/100511002/100625479/414424/100153809/100523701/448846
ssc05410	Hypertrophic cardiomyopathy	57	0.467306	1.37785	0.0499206	0.0499206	0.465311	2377	tags=39%, list=23%, signal=30%	397149/100154420/100049696/100515868/100037284/100158200/100623668/100145903/100523919/396585/396856/397491/397483/100524021/100157793/100512142/397504/100524101/397019/100516962/396860/396915
ssc01521	EGFR tyrosine kinase inhibitor resistance	53	0.475168	1.38341	0.05	0.05	0.465311	2926	tags=49%, list=28%, signal=35%	654328/100511026/100526147/100739349/100127478/100519331/100516641/100127158/100514115/100038023/100038030/397491/733648/100513811/100739510/100525045/110259208/100192436/100623707/397083/100126852/396633/100526136/397070/100156602/397202
MDM2
ID	Description	setSize	enrichmentScore	NES	pvalue	p.adjust	qvalues	rank	leading_edge	core_enrichment
ssc00640	Propanoate metabolism	26	0.711861	1.82779	0.000143493	0.000143493	0.043803	1337	tags=50%, list=13%, signal=44%	397324/100142666/397012/100142669/100621540/102161427/100156927/100512509/100523005/100158147/100153301/100502559/100156530
ssc00280	Valine, leucine and isoleucine degradation	39	0.65006	1.79718	0.00069667	0.00069667	0.106334	1762	tags=51%, list=17%, signal=43%	100142666/397604/397012/100142669/100626793/100156927/396841/100518224/100154810/100158147/100156047/100153301/100524223/100156530/100153809/100312959/100739500/100523701/100627341/448846
ssc05031	Amphetamine addiction	43	0.585712	1.64841	0.00346596	0.00346596	0.228452	1701	tags=33%, list=16%, signal=27%	100142689/100521797/100736966/100156170/397378/100622482/397241/397394/414424/733612/396603/100627903/397652/397674
ssc04922	Glucagon signaling pathway	76	0.513497	1.57712	0.00438766	0.00438766	0.228452	1731	tags=30%, list=17%, signal=25%	100155015/397324/100142689/397149/100286877/100621540/102161427/397595/100127478/100515868/100145903/397241/397394/100621536/100502559/396603/100627903/100513811/100157793/397239/397652/397674/397504
ssc00650	Butanoate metabolism	18	0.701677	1.65917	0.00459872	0.00459872	0.228452	1779	tags=39%, list=17%, signal=32%	397604/397012/100626793/100156927/100524223/448846/100157072
ssc03010	Ribosome	93	0.48764	1.53697	0.00466112	0.00466112	0.228452	1672	tags=33%, list=16%, signal=28%	397047/396989/100737826/110255317/397598/100512647/100520891/414398/100521315/100512482/396977/100624982/100521262/100514796/100517165/396993/100038023/100517840/100622852/100511022/100518988/100517705/100519932/100624945/100516385/100518410/100156324/110257174/100739774/100513028/414397
ssc00830	Retinol metabolism	22	0.666021	1.64956	0.00523865	0.00523865	0.228452	2005	tags=41%, list=19%, signal=33%	100519138/403111/100513555/100514967/100157319/100151799/100517586/100523701/100517137
ssc00670	One carbon pool by folate	15	0.719058	1.63412	0.00732656	0.00732656	0.22984	982	tags=27%, list=9%, signal=24%	100626911/414382/397180/100622210
ssc05100	Bacterial invasion of epithelial cells	43	0.554835	1.56151	0.0079024	0.0079024	0.22984	189	tags=21%, list=2%, signal=21%	780428/100174965/654328/100736650/100523778/100155875/100511026/397620/100526147
ssc05211	Renal cell carcinoma	45	0.547365	1.55102	0.0082656	0.0082656	0.22984	2440	tags=38%, list=24%, signal=29%	780428/654328/100511026/100739349/100523673/100127478/100170851/100511837/100513811/100153461/100739510/110259208/100192436/100525766/100623707/396653/100739306
ssc04931	Insulin resistance	86	0.474827	1.48323	0.00954198	0.00954198	0.22984	2274	tags=37%, list=22%, signal=29%	100142689/397149/100157568/406188/100127478/100515868/100525290/733702/100170851/100524932/397378/100127158/100145903/100518588/733648/100621536/733612/396754/100518810/100522174/100513811/397209/100157793/397239/100739510/397504/100523015/733659/100512070/100623707/100519270/100135665
ssc00532	Glycosaminoglycan biosynthesis - chondroitin sulfate / dermatan sulfate	16	0.693504	1.59881	0.010169	0.010169	0.22984	1669	tags=38%, list=16%, signal=31%	100316855/100625171/397642/100524793/100738738/100151968
ssc04660	T cell receptor signaling pathway	76	0.482435	1.48172	0.0101949	0.0101949	0.22984	2274	tags=36%, list=22%, signal=28%	780428/100739349/100157729/406188/100127478/100135663/396661/397286/397241/100192438/100125346/396603/100144492/100511837/100627903/100513811/397225/396636/100739510/100153830/110259208/100192436/100525766/100151931/100622217/100623707/100135665
ssc05020	Prion disease	168	0.415822	1.39929	0.0105409	0.0105409	0.22984	1893	tags=32%, list=18%, signal=26%	100155015/100154130/407060/100142689/100515564/100522775/100156967/100515069/100513030/100621969/100521797/100513895/100156790/100154443/100312976/414412/100516779/100523278/733594/100038022/397651/100516606/100517435/100038031/100622110/100514033/100157157/100515483/100522783/396856/397241/100579141/100739619/100737726/780433/448979/396603/100037951/100627903/100157442/414437/397652/100739510/10…
ssc00190	Oxidative phosphorylation	79	0.471603	1.45619	0.0133522	0.0133522	0.271728	1589	tags=37%, list=15%, signal=31%	100154130/100156052/100522775/100156967/100515069/100513030/100513895/100154443/100312976/414412/100038022/100516606/100038031/100622110/445531/100514033/100156112/100522783/100154942/100579141/100739619/100156681/100737726/780433/448979/100518959/106504095/100157442/733646
ssc04520	Adherens junction	47	0.525318	1.50107	0.0146455	0.0146455	0.279421	1020	tags=23%, list=10%, signal=21%	780428/102162332/654328/100170126/100523778/100153151/100155782/100517435/100516641/100135663/100513914
ssc04370	VEGF signaling pathway	34	0.567364	1.5316	0.0166408	0.0166408	0.298813	1845	tags=38%, list=18%, signal=32%	780428/100739349/100127478/397241/100520687/493184/396603/100627903/100513811/100519210/102162529/100739510/110259208
ssc04371	Apelin signaling pathway	89	0.445925	1.40015	0.0221127	0.0221127	0.375011	1890	tags=28%, list=18%, signal=23%	100155015/397149/397458/100739349/102158881/100127478/100515868/100524932/100127158/100145903/100038023/396856/100322893/100522824/100515992/100621398/100513811/100157793/100519210/100037273/397652/397504/100516558/110259208/100512852
ssc04921	Oxytocin signaling pathway	96	0.436684	1.38038	0.0267655	0.0267655	0.407151	1854	tags=26%, list=18%, signal=22%	100155015/397149/100626700/100739349/100515868/397378/100145903/100523919/396585/396856/397241/397394/100520687/100524021/733612/396603/100627903/100157793/397652/102162529/397674/397504/106504229/110259208/100524101
ssc04726	Serotonergic synapse	63	0.477228	1.42535	0.0279101	0.0279101	0.407151	1845	tags=21%, list=18%, signal=17%	100155015/403111/397687/100739349/397663/100623822/100511002/100520687/414424/100515992/397652/102162529/110259208
ssc05030	Cocaine addiction	25	0.588911	1.50053	0.0280092	0.0280092	0.407151	2274	tags=32%, list=22%, signal=25%	100142689/100521797/100736966/100626077/414424/397652/733700/100135665
ssc05144	Malaria	35	-0.476888	-1.46815	0.0299484	0.0299484	0.411504	1340	tags=26%, list=13%, signal=22%	397122/397400/397053/100623585/407066/396623/399541/397508/396941
ssc04625	C-type lectin receptor signaling pathway	68	0.466169	1.4076	0.0310047	0.0310047	0.411504	2274	tags=37%, list=22%, signal=29%	100155015/100739349/100623580/406188/100127478/100170851/396655/397241/780415/397319/100125959/100621398/100125346/396603/100627903/100513811/100739510/100153830/100516558/110259208/100519508/100525766/100038004/100623707/100135665
ssc04940	Type I diabetes mellitus	20	-0.563401	-1.52338	0.0381012	0.0381012	0.475327	1620	tags=35%, list=16%, signal=30%	100153387/100135037/492279/397122/397053/445528/100135036
ssc00380	Tryptophan metabolism	24	0.572543	1.44158	0.0493988	0.0493988	0.475327	1762	tags=46%, list=17%, signal=38%	397604/397012/100626793/100156927/397690/100511002/100625479/414424/100153809/100523701/448846
ssc05410	Hypertrophic cardiomyopathy	57	0.467306	1.37721	0.049913	0.049913	0.475327	2377	tags=39%, list=23%, signal=30%	397149/100154420/100049696/100515868/100037284/100158200/100623668/100145903/100523919/396585/396856/397491/397483/100524021/100157793/100512142/397504/100524101/397019/100516962/396860/396915
MRPS10
ID	Description	setSize	enrichmentScore	NES	pvalue	p.adjust	qvalues	rank	leading_edge	core_enrichment
ssc00640	Propanoate metabolism	26	-0.711861	-1.81719	0.000434028	0.000434028	0.0843618	1338	tags=50%, list=13%, signal=44%	100156530/100502559/100153301/100158147/100523005/100512509/100156927/100621540/102161427/100142669/397012/100142666/397324
ssc00280	Valine, leucine and isoleucine degradation	39	-0.65006	-1.79468	0.000552715	0.000552715	0.0843618	1763	tags=51%, list=17%, signal=43%	448846/100627341/100523701/100739500/100312959/100153809/100156530/100524223/100153301/100156047/100158147/100154810/100518224/396841/100156927/100626793/100142669/397012/397604/100142666
ssc04922	Glucagon signaling pathway	76	-0.513497	-1.57534	0.00409364	0.00409364	0.217981	1732	tags=30%, list=17%, signal=25%	397504/397674/397652/397239/100157793/100513811/100627903/396603/100502559/100621536/397394/397241/100145903/100515868/100127478/397595/100621540/102161427/100286877/397149/100142689/397324/100155015
ssc05031	Amphetamine addiction	43	-0.585712	-1.63971	0.00468901	0.00468901	0.217981	1702	tags=33%, list=16%, signal=27%	397674/397652/100627903/396603/733612/414424/397394/397241/100622482/397378/100156170/100736966/100521797/100142689
ssc00650	Butanoate metabolism	18	-0.701677	-1.66281	0.00488744	0.00488744	0.217981	1780	tags=39%, list=17%, signal=32%	100157072/448846/100524223/100156927/100626793/397012/397604
ssc03010	Ribosome	93	-0.48764	-1.53285	0.00516178	0.00516178	0.217981	1673	tags=33%, list=16%, signal=28%	414397/100513028/100739774/110257174/100156324/100518410/100516385/100624945/100519932/100517705/100518988/100511022/100622852/100517840/100038023/396993/100517165/100514796/100521262/100624982/396977/100512482/100521315/414398/100520891/100512647/397598/110255317/100737826/396989/397047
ssc00670	One carbon pool by folate	15	-0.719058	-1.63456	0.00529501	0.00529501	0.217981	983	tags=27%, list=10%, signal=24%	100622210/397180/414382/100626911
ssc00830	Retinol metabolism	22	-0.666021	-1.64364	0.00571261	0.00571261	0.217981	2006	tags=45%, list=19%, signal=37%	100294680/100517137/100523701/100517586/100151799/100157319/100514967/100513555/403111/100519138
ssc05100	Bacterial invasion of epithelial cells	43	-0.554835	-1.55327	0.00951593	0.00951593	0.259411	190	tags=23%, list=2%, signal=23%	100621541/100526147/397620/100511026/100155875/100523778/100736650/654328/100174965/780428
ssc00532	Glycosaminoglycan biosynthesis - chondroitin sulfate / dermatan sulfate	16	-0.693504	-1.60256	0.00987285	0.00987285	0.259411	1670	tags=38%, list=16%, signal=31%	100151968/100738738/100524793/397642/100625171/100316855
ssc05020	Prion disease	168	-0.415822	-1.39766	0.0105409	0.0105409	0.259411	1894	tags=32%, list=18%, signal=26%	100626738/595132/494014/100520115/100524394/445461/100624067/100517815/100155472/100154408/100739510/397652/414437/100157442/100627903/100037951/396603/448979/780433/100737726/100739619/100579141/397241/396856/100522783/100515483/100157157/100514033/100622110/100038031/100517435/100516606/397651/100038022/733594/100523278/100516779/414412/100312976/100154443/100156790/100513895/100521797/10062196…
ssc05211	Renal cell carcinoma	45	-0.547365	-1.5462	0.0111839	0.0111839	0.259411	2441	tags=38%, list=24%, signal=29%	100739306/396653/100623707/100525766/100192436/110259208/100739510/100153461/100513811/100511837/100170851/100127478/100523673/100739349/100511026/654328/780428
ssc04931	Insulin resistance	86	-0.474827	-1.48006	0.0118867	0.0118867	0.259411	2275	tags=37%, list=22%, signal=29%	100135665/100519270/100623707/100512070/733659/100523015/397504/100739510/397239/100157793/397209/100513811/100522174/100518810/396754/733612/100621536/733648/100518588/100145903/100127158/397378/100524932/100170851/733702/100525290/100515868/100127478/406188/100157568/397149/100142689
ssc04660	T cell receptor signaling pathway	76	-0.482435	-1.48004	0.0118971	0.0118971	0.259411	2275	tags=36%, list=22%, signal=28%	100135665/100623707/100622217/100151931/100525766/100192436/110259208/100153830/100739510/396636/397225/100513811/100627903/100511837/100144492/396603/100125346/100192438/397241/397286/396661/100135663/100127478/406188/100157729/100739349/780428
ssc00190	Oxidative phosphorylation	79	-0.471603	-1.4534	0.0155911	0.0155911	0.317292	1590	tags=37%, list=15%, signal=31%	733646/100157442/106504095/100518959/448979/780433/100737726/100156681/100739619/100579141/100154942/100522783/100156112/100514033/445531/100622110/100038031/100516606/100038022/414412/100312976/100154443/100513895/100513030/100515069/100156967/100522775/100156052/100154130
ssc04520	Adherens junction	47	-0.525318	-1.49215	0.0183275	0.0183275	0.330058	1021	tags=23%, list=10%, signal=21%	100513914/100135663/100516641/100517435/100155782/100153151/100523778/100170126/654328/102162332/780428
ssc04370	VEGF signaling pathway	34	-0.567364	-1.53054	0.0183808	0.0183808	0.330058	1846	tags=38%, list=18%, signal=32%	110259208/100739510/102162529/100519210/100513811/100627903/396603/493184/100520687/397241/100127478/100739349/780428
ssc04371	Apelin signaling pathway	89	-0.445925	-1.39425	0.0278411	0.0278411	0.422718	1891	tags=28%, list=18%, signal=23%	100512852/110259208/100516558/397504/397652/100037273/100519210/100157793/100513811/100621398/100515992/100522824/100322893/396856/100038023/100145903/100127158/100524932/100515868/100127478/102158881/100739349/397458/397149/100155015
ssc04726	Serotonergic synapse	63	-0.477228	-1.42085	0.029776	0.029776	0.422718	1846	tags=21%, list=18%, signal=17%	110259208/102162529/397652/100515992/414424/100520687/100511002/100623822/397663/100739349/397687/403111/100155015
ssc05144	Malaria	35	0.476888	1.47583	0.0306087	0.0306087	0.422718	1339	tags=26%, list=13%, signal=22%	396941/397508/399541/396623/407066/100623585/397053/397400/397122
ssc05030	Cocaine addiction	25	-0.588911	-1.49247	0.0309773	0.0309773	0.422718	2275	tags=32%, list=22%, signal=25%	100135665/733700/397652/414424/100626077/100736966/100521797/100142689
ssc04921	Oxytocin signaling pathway	96	-0.436684	-1.37802	0.0312187	0.0312187	0.422718	1855	tags=26%, list=18%, signal=22%	100524101/110259208/106504229/397504/397674/102162529/397652/100157793/100627903/396603/733612/100524021/100520687/397394/397241/396856/396585/100523919/100145903/397378/100515868/100739349/100626700/397149/100155015
ssc04625	C-type lectin receptor signaling pathway	68	-0.466169	-1.40568	0.0318496	0.0318496	0.422718	2275	tags=37%, list=22%, signal=29%	100135665/100623707/100038004/100525766/100519508/110259208/100516558/100153830/100739510/100513811/100627903/396603/100125346/100621398/100125959/397319/780415/397241/396655/100170851/100127478/406188/100623580/100739349/100155015
ssc04940	Type I diabetes mellitus	20	0.563401	1.53384	0.0353125	0.0353125	0.44915	1619	tags=35%, list=16%, signal=30%	100135036/445528/397053/397122/492279/100135037/100153387
ssc00380	Tryptophan metabolism	24	-0.572543	-1.4394	0.0474453	0.0474453	0.473967	1763	tags=46%, list=17%, signal=38%	448846/100523701/100153809/414424/100625479/100511002/397690/100156927/100626793/397012/397604
ssc00620	Pyruvate metabolism	34	-0.523139	-1.41124	0.0489687	0.0489687	0.473967	1578	tags=32%, list=15%, signal=28%	397538/100153809/100520040/100502559/100513555/100155997/100621540/102161427/100626793/397324/100156085
RPL7L1
ID	Description	setSize	enrichmentScore	NES	pvalue	p.adjust	qvalues	rank	leading_edge	core_enrichment
ssc00280	Valine, leucine and isoleucine degradation	39	-0.65006	-1.79371	0.000411523	0.000411523	0.0871949	1763	tags=51%, list=17%, signal=43%	448846/100627341/100523701/100739500/100312959/100153809/100156530/100524223/100153301/100156047/100158147/100154810/100518224/396841/100156927/100626793/100142669/397012/397604/100142666
ssc00640	Propanoate metabolism	26	-0.711861	-1.81388	0.000569314	0.000569314	0.0871949	1338	tags=50%, list=13%, signal=44%	100156530/100502559/100153301/100158147/100523005/100512509/100156927/100621540/102161427/100142669/397012/100142666/397324
ssc05031	Amphetamine addiction	43	-0.585712	-1.64331	0.00354707	0.00354707	0.258267	1702	tags=33%, list=16%, signal=27%	397674/397652/100627903/396603/733612/414424/397394/397241/100622482/397378/100156170/100736966/100521797/100142689
ssc04922	Glucagon signaling pathway	76	-0.513497	-1.57274	0.00408841	0.00408841	0.258267	1732	tags=30%, list=17%, signal=25%	397504/397674/397652/397239/100157793/100513811/100627903/396603/100502559/100621536/397394/397241/100145903/100515868/100127478/397595/100621540/102161427/100286877/397149/100142689/397324/100155015
ssc03010	Ribosome	93	-0.48764	-1.5404	0.00470647	0.00470647	0.258267	1673	tags=33%, list=16%, signal=28%	414397/100513028/100739774/110257174/100156324/100518410/100516385/100624945/100519932/100517705/100518988/100511022/100622852/100517840/100038023/396993/100517165/100514796/100521262/100624982/396977/100512482/100521315/414398/100520891/100512647/397598/110255317/100737826/396989/397047
ssc00650	Butanoate metabolism	18	-0.701677	-1.65153	0.00587717	0.00587717	0.258267	1780	tags=39%, list=17%, signal=32%	100157072/448846/100524223/100156927/100626793/397012/397604
ssc00670	One carbon pool by folate	15	-0.719058	-1.62403	0.00625186	0.00625186	0.258267	983	tags=27%, list=10%, signal=24%	100622210/397180/414382/100626911
ssc00830	Retinol metabolism	22	-0.666021	-1.64246	0.00674512	0.00674512	0.258267	2006	tags=45%, list=19%, signal=37%	100294680/100517137/100523701/100517586/100151799/100157319/100514967/100513555/403111/100519138
ssc05100	Bacterial invasion of epithelial cells	43	-0.554835	-1.55668	0.0095498	0.0095498	0.262234	190	tags=23%, list=2%, signal=23%	100621541/100526147/397620/100511026/100155875/100523778/100736650/654328/100174965/780428
ssc05020	Prion disease	168	-0.415822	-1.40132	0.00980958	0.00980958	0.262234	1894	tags=32%, list=18%, signal=26%	100626738/595132/494014/100520115/100524394/445461/100624067/100517815/100155472/100154408/100739510/397652/414437/100157442/100627903/100037951/396603/448979/780433/100737726/100739619/100579141/397241/396856/100522783/100515483/100157157/100514033/100622110/100038031/100517435/100516606/397651/100038022/733594/100523278/100516779/414412/100312976/100154443/100156790/100513895/100521797/10062196…
ssc00532	Glycosaminoglycan biosynthesis - chondroitin sulfate / dermatan sulfate	16	-0.693504	-1.59293	0.0100726	0.0100726	0.262234	1670	tags=38%, list=16%, signal=31%	100151968/100738738/100524793/397642/100625171/100316855
ssc05211	Renal cell carcinoma	45	-0.547365	-1.54828	0.0111186	0.0111186	0.262234	2441	tags=38%, list=24%, signal=29%	100739306/396653/100623707/100525766/100192436/110259208/100739510/100153461/100513811/100511837/100170851/100127478/100523673/100739349/100511026/654328/780428
ssc04931	Insulin resistance	86	-0.474827	-1.48373	0.0111292	0.0111292	0.262234	2275	tags=37%, list=22%, signal=29%	100135665/100519270/100623707/100512070/733659/100523015/397504/100739510/397239/100157793/397209/100513811/100522174/100518810/396754/733612/100621536/733648/100518588/100145903/100127158/397378/100524932/100170851/733702/100525290/100515868/100127478/406188/100157568/397149/100142689
ssc04660	T cell receptor signaling pathway	76	-0.482435	-1.47761	0.0134151	0.0134151	0.293518	2275	tags=36%, list=22%, signal=28%	100135665/100623707/100622217/100151931/100525766/100192436/110259208/100153830/100739510/396636/397225/100513811/100627903/100511837/100144492/396603/100125346/100192438/397241/397286/396661/100135663/100127478/406188/100157729/100739349/780428
ssc00190	Oxidative phosphorylation	79	-0.471603	-1.45471	0.0148008	0.0148008	0.302247	1590	tags=37%, list=15%, signal=31%	733646/100157442/106504095/100518959/448979/780433/100737726/100156681/100739619/100579141/100154942/100522783/100156112/100514033/445531/100622110/100038031/100516606/100038022/414412/100312976/100154443/100513895/100513030/100515069/100156967/100522775/100156052/100154130
ssc04370	VEGF signaling pathway	34	-0.567364	-1.52443	0.0166016	0.0166016	0.313514	1846	tags=38%, list=18%, signal=32%	110259208/100739510/102162529/100519210/100513811/100627903/396603/493184/100520687/397241/100127478/100739349/780428
ssc04520	Adherens junction	47	-0.525318	-1.49952	0.0173995	0.0173995	0.313514	1021	tags=23%, list=10%, signal=21%	100513914/100135663/100516641/100517435/100155782/100153151/100523778/100170126/654328/102162332/780428
ssc04371	Apelin signaling pathway	89	-0.445925	-1.40001	0.0260177	0.0260177	0.419486	1891	tags=28%, list=18%, signal=23%	100512852/110259208/100516558/397504/397652/100037273/100519210/100157793/100513811/100621398/100515992/100522824/100322893/396856/100038023/100145903/100127158/100524932/100515868/100127478/102158881/100739349/397458/397149/100155015
ssc05144	Malaria	35	0.476888	1.48208	0.0260197	0.0260197	0.419486	1339	tags=26%, list=13%, signal=22%	396941/397508/399541/396623/407066/100623585/397053/397400/397122
ssc04921	Oxytocin signaling pathway	96	-0.436684	-1.38575	0.0284763	0.0284763	0.43258	1855	tags=26%, list=18%, signal=22%	100524101/110259208/106504229/397504/397674/102162529/397652/100157793/100627903/396603/733612/100524021/100520687/397394/397241/396856/396585/100523919/100145903/397378/100515868/100739349/100626700/397149/100155015
ssc04726	Serotonergic synapse	63	-0.477228	-1.42467	0.0310219	0.0310219	0.43258	1846	tags=21%, list=18%, signal=17%	110259208/102162529/397652/100515992/414424/100520687/100511002/100623822/397663/100739349/397687/403111/100155015
ssc05030	Cocaine addiction	25	-0.588911	-1.49054	0.0334662	0.0334662	0.43258	2275	tags=32%, list=22%, signal=25%	100135665/733700/397652/414424/100626077/100736966/100521797/100142689
ssc04625	C-type lectin receptor signaling pathway	68	-0.466169	-1.40822	0.0335052	0.0335052	0.43258	2275	tags=37%, list=22%, signal=29%	100135665/100623707/100038004/100525766/100519508/110259208/100516558/100153830/100739510/100513811/100627903/396603/100125346/100621398/100125959/397319/780415/397241/396655/100170851/100127478/406188/100623580/100739349/100155015
ssc04940	Type I diabetes mellitus	20	0.563401	1.52417	0.0338928	0.0338928	0.43258	1619	tags=35%, list=16%, signal=30%	100135036/445528/397053/397122/492279/100135037/100153387
ssc00860	Porphyrin metabolism	16	-0.629547	-1.44603	0.0482891	0.0482891	0.480983	924	tags=44%, list=9%, signal=40%	100625219/100511474/100514239/100515289/100157459/100322873/100524598

## Sheet: S9
Table S9: The detail information of four potential biomarkers about qPCR.
HDAC1		ΔCt	2^(-ΔCt)	2^(-ΔΔCt)	Mean±SD	P
	lean-type pigs	5.71402	0.0190505	0.895835	1.00±0.08	0.0167
		5.4253	0.0232713	1.09431
		5.54118	0.0214752	1.00985
	obese-type pigs	5.12923	0.0285725	1.3436	1.29±0.06
		5.29241	0.0255168	1.1999
		5.15288	0.028108	1.32175
MDM2		ΔCt	2^(-ΔCt)	2^(-ΔΔCt)	Mean±SD	P
	lean-type pigs	8.358	0.00304784	1.02952	1.00±0.03	0.1515
		8.43327	0.0028929	0.977187
		8.40969	0.00294057	0.99329
	obese-type pigs	7.54943	0.00533821	1.80318	1.28±0.37
		8.35619	0.00305166	1.03082
		7.95931	0.00401798	1.35723
MRPS10		ΔCt	2^(-ΔCt)	2^(-ΔΔCt)	Mean±SD	P
	lean-type pigs	0.308912	0.807251	1.19723	1.12±0.08	0.0015
		0.521257	0.696765	1.03337
		0.946817	0.518776	0.769396
	obese-type pigs	5.23447	0.0265625	0.0393948	0.28±0.34
		5.4126	0.0234771	0.0348189
		7.12591	0.00715959	0.0106184
RPL7L1		ΔCt	2^(-ΔCt)	2^(-ΔΔCt)	Mean±SD	P
	lean-type pigs	4.16485	0.0557512	1.07713	1.00±0.08	0.0081
		4.39467	0.0475414	0.91851
		4.26576	0.0519851	1.00436
	obese-type pigs	5.42187	0.0233268	0.450679	0.61±0.28
		5.66082	0.0197662	0.381887
		4.82686	0.0352347	0.680743
