# Supplementary material for: Identification of potential obese-specific biomarkers and pathways associated with abdominal subcutaneous fat deposition in pig using a comprehensive bioinformatics strategy
Source: PeerJ. 2024 May 31;12:e17486. doi: 10.7717/peerj.17486 (PMC11146330; doi:10.7717/peerj.17486)
Supplement: Supplemental Information 3 [file peerj-12-17486-s003.xls]

## Sheet: Sheet1
ITEM TO CHECK	IMPORTANCE	CHECKLIST
EXPERIMENTAL DESIGN
Definition of experimental and control groups	E	lines 148-149
Number within each group	E	line 148
Assay carried out by core lab or investigator's lab?	D
Acknowledgement of authors' contributions	D
SAMPLE
Description	E	lines 148-156
Volume/mass of sample processed	D
Microdissection or macrodissection	E	lines 155-156
Processing procedure	E	lines 155-157
If frozen - how and how quickly?	E	lines 156-158
If fixed - with what, how quickly?	E
Sample storage conditions and duration (especially for FFPE samples)	E	lines 156-158
NUCLEIC ACID EXTRACTION
Procedure and/or instrumentation	E	lines 164-165
Name of kit and details of any modifications	E	lines 164-165
Source of additional reagents used	D
Details of DNase or RNAse treatment	E	lines 164-165
Contamination assessment (DNA or RNA)	E	lines 166-167
Nucleic acid quantification	E	lines 166-167
Instrument and method	E	lines 166-167
Purity (A260/A280)	D
Yield	D
RNA integrity method/instrument	E	NA
RIN/RQI or Cq of 3' and 5' transcripts	E	NA
Electrophoresis traces	D
Inhibition testing (Cq dilutions, spike or other)	E	NA
REVERSE TRANSCRIPTION
Complete reaction conditions	E	lines 167-168
Amount of RNA and reaction volume	E	lines 167-168
Priming oligonucleotide (if using GSP) and concentration	E	lines 167-168
Reverse transcriptase and concentration	E	lines 167-168
Temperature and time	E	lines 167-168
Manufacturer of reagents and catalogue numbers	D
Cqs with and without RT	D*
Storage conditions of cDNA	D
qPCR TARGET INFORMATION
If multiplex, efficiency and LOD of each assay.	E	NA
Sequence accession number	E	Table S2
Location of amplicon	D
Amplicon length	E	Table S2
In silico specificity screen (BLAST, etc)	E	NA
Pseudogenes, retropseudogenes or other homologs?	D
Sequence alignment	D
Secondary structure analysis of amplicon	D
Location of each primer by exon or intron (if applicable)	E	NA
What splice variants are targeted?	E	NA
qPCR OLIGONUCLEOTIDES
Primer sequences	E	Table S2
RTPrimerDB Identification Number	D
Probe sequences	D**
Location and identity of any modifications	E	NA
Manufacturer of oligonucleotides	D
Purification method	D
qPCR PROTOCOL
Complete reaction conditions	E	lines 169-170
Reaction volume and amount of cDNA/DNA	E	lines 169-170
Primer, (probe), Mg++ and dNTP concentrations	E	lines 169-170
Polymerase identity and concentration	E	lines 169-170
Buffer/kit identity and manufacturer	E	lines 169-170
Exact chemical constitution of the buffer	D
Additives (SYBR Green I, DMSO, etc.)	E	lines 169-170
Manufacturer of plates/tubes and catalog number	D
Complete thermocycling parameters	E	lines 169-170
Reaction setup (manual/robotic)	D
Manufacturer of qPCR instrument	E	lines 169-170
qPCR VALIDATION
Evidence of optimisation (from gradients)	D
Specificity (gel, sequence, melt, or digest)	E	Table S9
For SYBR Green I, Cq of the NTC	E	Table S9
Standard curves with slope and y-intercept	E	NA
PCR efficiency calculated from slope	E	NA
Confidence interval for PCR efficiency or standard error	D
r2 of standard curve	E	NA
Linear dynamic range	E	NA
Cq variation at lower limit	E	NA
Confidence intervals throughout range	D
Evidence for limit of detection	E	NA
If multiplex, efficiency and LOD of each assay.	E	NA
DATA ANALYSIS
qPCR analysis program (source, version)	E	lines 171-173
Cq method determination	E	lines 171-173
Outlier identification and disposition	E	NA
Results of NTCs	E	lines 171-173
Justification of number and choice of reference genes	E	line 173
Description of normalisation method	E	lines 171-173
Number and concordance of biological replicates	D
Number and stage (RT or qPCR) of technical replicates	E	lines 171-173
Repeatability (intra-assay variation)	E	Table S9
Reproducibility (inter-assay variation, %CV)	D
Power analysis	D
Statistical methods for result significance	E	Table S9
Software (source, version)	E	lines 173-176
Cq or raw data submission using RDML	D
Table 1. MIQE checklist for authors, reviewers and editors. All essential information (E) must be submitted with the manuscript. Desirable
information (D) should be submitted if available. If using primers obtained from RTPrimerDB, information on qPCR target, oligonucleotides,
protocols and validation is available from that source.
*: Assessing the absence of DNA using a no RT assay is essential when first extracting RNA. Once the sample has been validated as
RDNA-free, inclusion of a no-RT control is desirable, but no longer essential.
**: Disclosure of the probe sequence is highly desirable and strongly encouraged. However, since not all commercial pre-designed assay
vendors provide this information, it cannot be an essential requirement. Use of such assays is advised against.
