# Supplementary material for: Identification of potential obese-specific biomarkers and pathways associated with abdominal subcutaneous fat deposition in pig using a comprehensive bioinformatics strategy
Source: PeerJ. 2024 May 31;12:e17486. doi: 10.7717/peerj.17486 (PMC11146330; doi:10.7717/peerj.17486)
Supplement: Supplemental Information 5 [file peerj-12-17486-s005.xlsx]

## Sheet: qPCR_data
The detail information of four potential biomarkers about qPCR.
HDAC1		ΔCt	2^(-ΔCt)	2^(-ΔΔCt)	Mean±SD	P
	lean-type pigs	5.71402	0.0190505	0.895835	1.00±0.08	0.0167
		5.4253	0.0232713	1.09431
		5.54118	0.0214752	1.00985
	obese-type pigs	5.12923	0.0285725	1.3436	1.29±0.06
		5.29241	0.0255168	1.1999
		5.15288	0.028108	1.32175
MDM2		ΔCt	2^(-ΔCt)	2^(-ΔΔCt)	Mean±SD	P
	lean-type pigs	8.358	0.00304784	1.02952	1.00±0.03	0.1515
		8.43327	0.0028929	0.977187
		8.40969	0.00294057	0.99329
	obese-type pigs	7.54943	0.00533821	1.80318	1.28±0.37
		8.35619	0.00305166	1.03082
		7.95931	0.00401798	1.35723
MRPS10		ΔCt	2^(-ΔCt)	2^(-ΔΔCt)	Mean±SD	P
	lean-type pigs	0.308912	0.807251	1.19723	1.12±0.08	0.0015
		0.521257	0.696765	1.03337
		0.946817	0.518776	0.769396
	obese-type pigs	5.23447	0.0265625	0.0393948	0.28±0.34
		5.4126	0.0234771	0.0348189
		7.12591	0.00715959	0.0106184
RPL7L1		ΔCt	2^(-ΔCt)	2^(-ΔΔCt)	Mean±SD	P
	lean-type pigs	4.16485	0.0557512	1.07713	1.00±0.08	0.0081
		4.39467	0.0475414	0.91851
		4.26576	0.0519851	1.00436
	obese-type pigs	5.42187	0.0233268	0.450679	0.61±0.28
		5.66082	0.0197662	0.381887
		4.82686	0.0352347	0.680743
